## 27 **Introduction**

28 Eukaryotic gene expression is regulated by chromatin regulators (CRs) and the histone and  
29 DNA modifications they read, write, and remove<sup>1,2</sup>. Chromatin-mediated gene regulation is crucial  
30 in development, aging, and disease<sup>3-5</sup>; it is also important in synthetic biology, where precise  
31 control of gene expression is necessary<sup>6,7</sup>. Site-specific recruitment of CRs is a common method  
32 of regulating gene expression in synthetic systems. CRs modulate gene expression with varying  
33 kinetics and can establish long-term epigenetic memory through positive feedback mechanisms<sup>8-</sup>  
34 <sup>11</sup>. However, positive feedback also enables spreading of epigenetic effects beyond the target locus,  
35 which can lead to undesirable changes in global gene expression. Neither the temporal dynamics  
36 nor the spatial extent of this process are well characterized. Here, we seek to understand the effects  
37 of intergenic distance and insulators on the dynamics of spreading of gene silencing and activation  
38 between two neighboring genes. This understanding will be useful for building more robust  
39 synthetic systems and epigenetic therapies.

40 To understand the effects of intergenic distance and insulators on spreading, we studied the  
41 dynamics of spreading of gene silencing after recruitment of different types of CRs to a dual-gene  
42 reporter (Figure 1A-B). This reporter consists of two fluorescent genes separated by increasing  
43 DNA distances or insulator elements derived from the chicken hypersensitivity site 4 (cHS4)<sup>12-14</sup>.  
44 At this reporter, we recruited two types of chromatin regulators: Kruppel associated box (KRAB)  
45 and Histone deacetylase 4 (HDAC4).

46 The Kruppel associated box (KRAB) from zinc finger 10 is a commonly used repressive  
47 domain that is associated with spreading of heterochromatin and epigenetic memory through  
48 positive feedback mechanisms<sup>8,15-22</sup>. KRAB-mediated gene silencing operates through recruitment  
49 of cofactors, including KAP1, HP1, and SETDB1, that read and write the repressive histone  
50 modification, histone 3 lysine 9 trimethylation (H3K9me3), creating a positive feedback loop that  
51 establishes stable gene silencing<sup>9</sup>. This type of feedback also enables spreading of epigenetic  
52 effects beyond the target locus<sup>19,20,23</sup>.

53 Histone deacetylase 4 (HDAC4) is a repressive CR that functions primarily through  
54 removal of histone acetylation<sup>24,25</sup>. Unlike KRAB, however, HDAC4 does not exhibit positive  
55 read-write feedback. In addition, our previous studies show that removal of HDAC4 after silencing  
56 leads to quick and complete reactivation of the gene<sup>8</sup>. Due to lack of positive feedback and  
57 memory, we hypothesized that spreading of silencing beyond the target locus would not occur  
58 upon HDAC4 recruitment.

59 We used single-cell time-lapse microscopy and flow cytometry to monitor gene expression  
60 during and after KRAB or HDAC4 recruitment to the upstream gene. We found that transcriptional  
61 silencing of the upstream gene by recruitment of either KRAB or HDAC4 affects the downstream  
62 gene even when separated by up to 5kb of distance or with different insulator arrangements. For  
63 KRAB, the time required for spreading to occur is short and largely distance-dependent. For  
64 HDAC4 however, the delay time between silencing of the two genes is longer, does not increase  
65 with intergenic distance, and can be influenced by insulators. We used these findings to form a  
66 kinetic model that leverages information from changes in histone modifications to understand the  
67 dynamics of gene expression during both silencing and reactivation. Our results show that targeted  
68 transcriptional silencing affects neighboring genes and provide insight for designing novel  
69 synthetic systems in mammalian cells.

70

## 71 **Results**

### 72 *Spreading of transcriptional silencing between genes*

73 To study the spreading of transcriptional silencing and chromatin modifications, we  
74 engineered a set of mammalian cell lines containing two neighboring fluorescent reporter genes  
75 and a CR, with each gene driven by constitutive promoters (Figure 1A-B, Figure 1–figure  
76 supplement 1). The addition or removal of doxycycline (dox) induces the recruitment or release,  
77 respectively, of the rTetR-fused CRs upstream of the first reporter gene, enabling precise control  
78 over the duration of recruitment (Figure 1A-B). To finely probe the effect of intergenic distance  
79 on spreading dynamics, we separated the two fluorescent genes by various spacer lengths.  
80 Specifically, we separated the genes with no spacer (NS) (Figure 1A) or 5kb lambda phage DNA  
81 (5kb) (Figure 1B), which was used as a neutral spacer<sup>26</sup>. To mitigate variability due to genomic  
82 position, we site-specifically integrated our reporters in two cell types: in CHO-K1 (Chinese  
83 Hamster Ovarian) at the phiC31 integration site on the multi-integrase human artificial  
84 chromosome (MI-HAC)<sup>27</sup> and in human K562 at the AAVS1 safe harbor locus on chromosome  
85 19 (Figure 1–figure supplement 1)<sup>28</sup>.

86 To investigate the spreading of transcriptional silencing, we first recruited KRAB upstream  
87 of the mCitrine gene for 5 days in CHO-K1 and K562 cell lines with the addition of dox (Figure  
88 1A-B). Using flow cytometry to measure fluorescence intensity, we observed silencing of both the  
89 upstream mCitrine gene and the downstream mCherry gene in the NS (Figure 1C-D) and 5kb

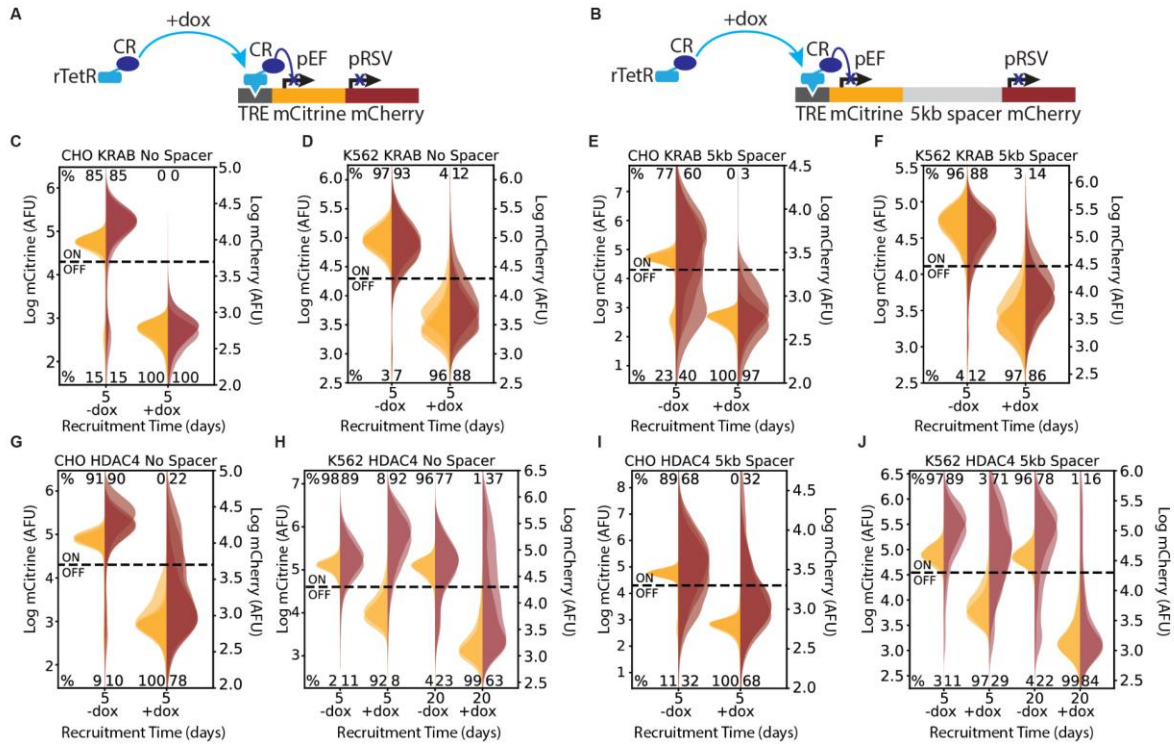

90  
91 **Figure 1. Recruitment of chromatin regulators to synthetic dual-fluorescent reporters results**  
92 **in transcriptional silencing of both genes.**

93 (A, B) Recruitment of a chromatin regulator (dark blue oval) via addition of dox allows for the  
94 binding of the rTetR-CR fusion to TRE (Tet Responsive Element, dark grey), upstream of a dual-  
95 gene reporter expressing mCitrine (yellow) and mCherry (red) separated by either (A) no spacer  
96 or (B) 5kb of lambda DNA (gray). (C-J) Fluorescence distributions of mCitrine and mCherry  
97 measured by flow cytometry either without CR recruitment (-dox) or after 5 or 20 days of  
98 recruitment (+dox) of either KRAB or HDAC4 at the NS or 5kb reporters in either CHO-K1 or  
99 K562 as indicated in each title. Percentages of cells ON (high-fluorescence, top) or OFF (low-  
100 fluorescence, bottom) are calculated based on a threshold (dotted line). Data from independent  
101 clonal cell lines for CHO-K1 or biological replicates of multiclonal populations for K562 are  
102 shown as overlaid semi-transparent distributions (n=3).

103  
104 **Figure 1 - figure supplement 1.** Reporter constructs used in different cell lines for analyzing  
105 spreading of transcriptional changes.

106 **Figure 1 - figure supplement 2.** Transcriptional run-on from pEF over pRSV.

107 (Figure 1E-F) reporter lines for both cell types. This observation is consistent with previous reports  
108 of spreading of silencing upon KRAB recruitment<sup>20,23</sup>. Surprisingly, HDAC4 recruitment also  
109 resulted in silencing of both genes (Figure 1G-J), albeit with reduced strength: only 68-78% of  
110 CHO-K1 cells silenced mCherry with HDAC4 (Figure 1G&I) compared to 97-100% with KRAB  
111 (Figure 1C&E). Moreover, in K562 cells, HDAC4-mediated silencing of mCherry was much  
112 slower, taking up to 20 days, compared to 5 days in CHO-K1 cells (Figure 1H&J). These results  
113 show for the first time that silencing mediated by a histone deacetylase can also extend to nearby  
114 genes.

115 Additionally, we noticed that in CHO-K1 cells in the absence of dox, mCherry expression  
116 is lower and has a wider distribution in the 5kb reporter compared to NS (Figure 1E&I vs. C&G).  
117 This observation suggests that the two promoters interfere, as observed before<sup>29</sup>, in a distance-  
118 dependent manner. Surprisingly, in K562 we saw an increase in pRSV-mCherry expression after  
119 5 days of dox-mediated HDAC4 recruitment and pEF-mCitrine silencing (Figure 1H). We found  
120 that this transcriptional interference between pEF and pRSV results from transcriptional run-on  
121 from the pEF promoter which is resolved upon mCitrine silencing (Figure 1H, Figure 1–figure  
122 supplement 2A-B, Supplemental Text). Despite this type of transcriptional interference, we can  
123 still measure the silencing dynamics of the downstream gene.

124

### 125 ***Changes in histone modifications upon transcriptional silencing of neighboring genes***

126 To see if the changes in gene expression were accompanied by changes in chromatin  
127 modifications, we used CUT&RUN<sup>30,31</sup> to map activating and repressive histone modifications.  
128 Recruitment of KRAB for 5 days in K562 cells at the 5kb reporter resulted in loss of the activating  
129 histone 3 lysine acetylation (H3Kac) and a strong increase in the repressive modification  
130 H3K9me3 across the recruitment site, both fluorescent protein genes, and the 5kb spacer (Figure  
131 2A). This increase in H3K9me3 and decrease in H3Kac was also observed in the NS reporter line  
132 (Figure 2–figure supplement 1A) and was accompanied by a concomitant depletion of histone 3  
133 lysine 4 trimethylation (H3K4me3), which is associated with active genes, in both reporter lines  
134 (Figure 2–figure supplement 1A-B). Moreover, we observed an increase in H3K9me3 beyond the  
135 AAVS1 integration site into neighboring genes (Figure 2B), corresponding to a region of  
136 enrichment of approximately 50-60 kb beyond the reporter (Figure 2–figure supplement 1C-D).  
137 This too was accompanied by a depletion of H3Kac and H3K4me3 in the immediate vicinity of



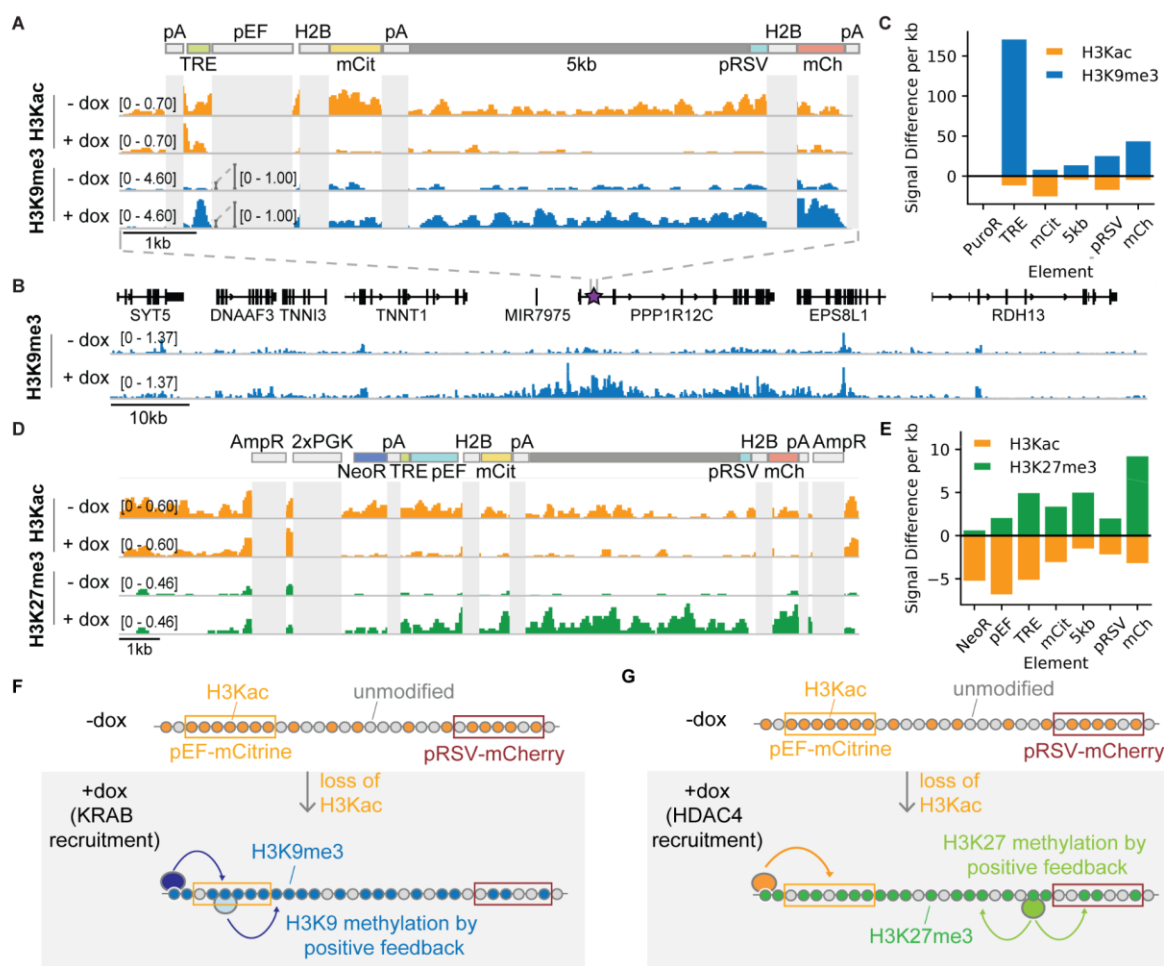

138  
 139 **Figure 2. CUT&RUN data shows changes in histone modifications at silenced genes.**  
 140 (A) Genome browser tracks showing counts per million (CPM)-normalized reads after  
 141 CUT&RUN for histone 3 acetyl-lysine (H3Kac) and histone 3 lysine 9 trimethylation (H3K9me3)  
 142 with (+dox) and without (-dox) recruitment of rTetR-KRAB to the 5kb-spacer reporter in K562  
 143 cells. Non-unique regions resulting in ambiguous alignment, including pEF, H2B, and polyA tails  
 144 (pA), are masked in light gray. (B) Genome browser tracks of H3K9me3 with (+dox) and without  
 145 (-dox) recruitment of rTetR-KRAB, looking at the surrounding locus where the 5kb reporter is  
 146 integrated in cells (purple star within first intron of PPP1R12C). This snapshot does not include  
 147 an in-situ representation of the reporter, which instead was appended to the end of the reference  
 148 genome to preserve gene annotations. (C) Quantification of signal difference for H3K9me3 and  
 149 (H3Kac) with (+dox) and without (-dox) recruitment of KRAB for 5 days to the 5kb reporter in  
 150 K562 cells. (D) Genome browser tracks showing CPM-normalized reads after CUT&RUN for  
 151 H3Kac and histone 3 lysine 27 trimethylation (H3K27me3) with (+dox) and without (-dox)  
 152 recruitment of rTetR-HDAC4 to the 5kb-spacer reporter in K562 cells. Non-unique regions  
 153 resulting in ambiguous alignment, including AmpR, PGK, H2B, and polyA tails (pA), are masked  
 154 in light gray. (E) Quantification of signal difference for H3Kac and H3K27me3 with (+dox) and  
 155 without (-dox) recruitment of HDAC4 for 5 days to the 5kb reporter in K562 cells. (F) Distance-  
 156 dependent delay of transcriptional silencing between two genes via recruitment of KRAB leads to

157 loss of H3Kac and gain of H3K9me3 across the dual-gene reporter through both DNA looping  
158 from rTetR-KRAB as well as positive feedback loops for spread of methylation. **(G)** Distance-  
159 independent delay of transcriptional silencing between two genes via recruitment of HDAC4 leads  
160 to a loss of H3Kac as well as a gain of H3K27me3 across the reporter through positive feedback  
161 loops for spread of methylation.  
162

163 **Figure 2 -figure supplement 1.** Changes in chromatin modifications at the two-gene reporter  
164 and surrounding AAVS1 locus after recruitment of KRAB for five days in K562 cells.

165 **Figure 2 - figure supplement 2.** Recruitment of KRAB or HDAC4 for five days in CHO-K1 cells  
166 induces changes in chromatin modifications at the two-gene reporters.

167 the AAVS1 integration site. The magnitude of histone modification changes in this vicinity was  
168 comparable between the NS and 5kb reporter lines (Figure 2–figure supplement 1E). We observed  
169 similar changes in chromatin modifications in CHO-K1 cells after 5 days of KRAB recruitment to  
170 the 5kb reporter (Figure 2–figure supplement 2A), showing that these changes in histone  
171 modifications coincide with the spreading of transcriptional silencing at the reporter in different  
172 cell lines.

173 Recruitment of HDAC4 for 5 days in CHO-K1 cells to the 5kb and NS reporters showed a  
174 decrease in acetylation levels, and no change in H3K9me3 (Figure 2D-E, Figure 2–figure  
175 supplement 2B-C), as expected. However, surprisingly histone 3 lysine 27 trimethylation  
176 (H3K27me3) was also detected throughout the 5kb (Figure 2D-E) and the NS reporters (Figure 2–  
177 figure supplement 2B). This repressive modification, which is associated with polycomb  
178 repressive complex 2 (PRC2), has not been reported in association with HDAC4, and was not  
179 observed after HDAC4 recruitment at a pEF-mCitrine reporter flanked by insulators in the same  
180 locus of CHO-K1 cells <sup>8</sup>. Like H3K9me3 (Figure 2E), H3K27me3 has reader-writer positive  
181 feedback <sup>10</sup> that can lead to spreading of these chromatin modifications (Figure 2F). This  
182 observation suggests that silencing of the RSV promoter is indirectly due to PRC2 action, but it  
183 can only take place once HDAC4 removes acetylation at the locus. This system allows us to study  
184 the temporal and distance dependence dynamics of this type of indirect spreading of silencing,  
185 where silencing of one gene opens the door for other repressive complexes to silence neighboring  
186 genes (Figure 2E). We can compare these dynamics with those associated with direct silencing by  
187 KRAB, where repressive modifications that are associated with the recruited chromatin regulator  
188 spread across the locus (Figure 2F).

189

### 190 *Dynamics of spreading of transcriptional silencing—delay between two genes*

191 We measured the spreading dynamics of transcriptional silencers at finer temporal  
192 resolution by first taking time-lapse movies of CHO-K1 cells with the NS and 5kb spreading  
193 reporters (Movies S1-S4). Cells were imaged every 20 mins for 4-5 days and cumulative  
194 fluorescence traces were used to determine transcriptional silencing times after dox addition  
195 (Figure 3A, Figure 3–figure supplement 1). Upon KRAB recruitment, we observed only a slight  
196 delay of  $2.3 \pm 3.1$  hours between mCitrine and mCherry silencing in the NS reporter and a longer  
197 delay of  $12.3 \pm 9.8$  hours in the 5kb reporter (Figure 3B&C, Figure 3–figure supplement 1A&B).  
198 In contrast, spreading of HDAC4-mediated transcriptional silencing was slower, and no



199 appreciable difference in silencing delays was observed between reporter lines (NS: 37+/- 21  
200 hours; 5kb: 32+/-19 hours) (Figure 3D&E, Figure 3–figure supplement 1C&D). Taken together,  
201 these data suggest that KRAB-mediated spreading of transcriptional silencing is distance-  
202 dependent in CHO-K1 cells while HDAC4 mediated spreading is distance-independent at these  
203 length scales.

204 Since time-lapse microscopy measurements are limited to hundreds of cells and hard to  
205 extend to non-adherent cell lines like K562, we developed an alternative approach to extracting  
206 the delay times between silencing of the two reporter genes from flow cytometry data. We  
207 developed a mathematical model that describes the evolution of mCitrine and mCherry  
208 fluorescence distributions after CR recruitment (Figure 3F, Materials and Methods). We used our  
209 daily flow cytometry measurements of fluorescence distributions to fit silencing times for each  
210 gene (Figure 3G-J), along with other parameters associated with gene expression including a spike  
211 in mCherry mRNA production due to transcriptional interference (as shown by qPCR in Figure 1–  
212 figure supplement 2C&D) and mRNA and protein degradation and dilution (Materials and  
213 Methods). This approach allowed us to estimate the delay between mCitrine and mCherry  
214 silencing,  $\Delta\tau_s$ , at the gene rather than protein level for all spreading reporters in CHO-K1 and  
215 K562 with different CRs recruited (Figure 3G-J, Figure 3–figure supplement 2, Table S2). Overall,  
216 the delay between mCitrine and mCherry silencing are similar between movie traces and fits of  
217 the cytometry data (Figure 3C&E vs. I&J), especially if we consider the additional time necessary  
218 for mRNA degradation of about ~4 hours<sup>8</sup> included in the flow fits (Materials and Methods).

219 These delays show similar trends with distance in CHO-K1 and K562 cells for a given CR.  
220 KRAB recruitment results in silencing delays that increase with intergenic distance (Figure 3I).  
221 HDAC4 recruitment results in delays that are not statistically different among different distances  
222 in either cell type, but show a trend where delay decreases with increased distance in K562 from  
223 around 10 days in the NS reporter to around 5 days in the 5kb reporter (Figure 3J). The observation  
224 that the delays of pRSV-mCherry silencing do not increase with distance (Figure 3E&J) suggests  
225 that its silencing initiates at the RSV promoter, most likely by the action of PRC2 (Figure 2D,  
226 E&G).

227 Silencing spreads slower in K562 versus CHO-K1 cells after both KRAB and HDAC4  
228 recruitment (Figure 3I vs J), consistent with the 5 days results (Figure 1). This is most likely  
229 because the pRSV promoter is stronger in K562 cells, as indicated by higher mCherry expression  
230 compared to CHO-K1 cells for both the NS and 5kb reporters (Figure 3–figure supplement 3).

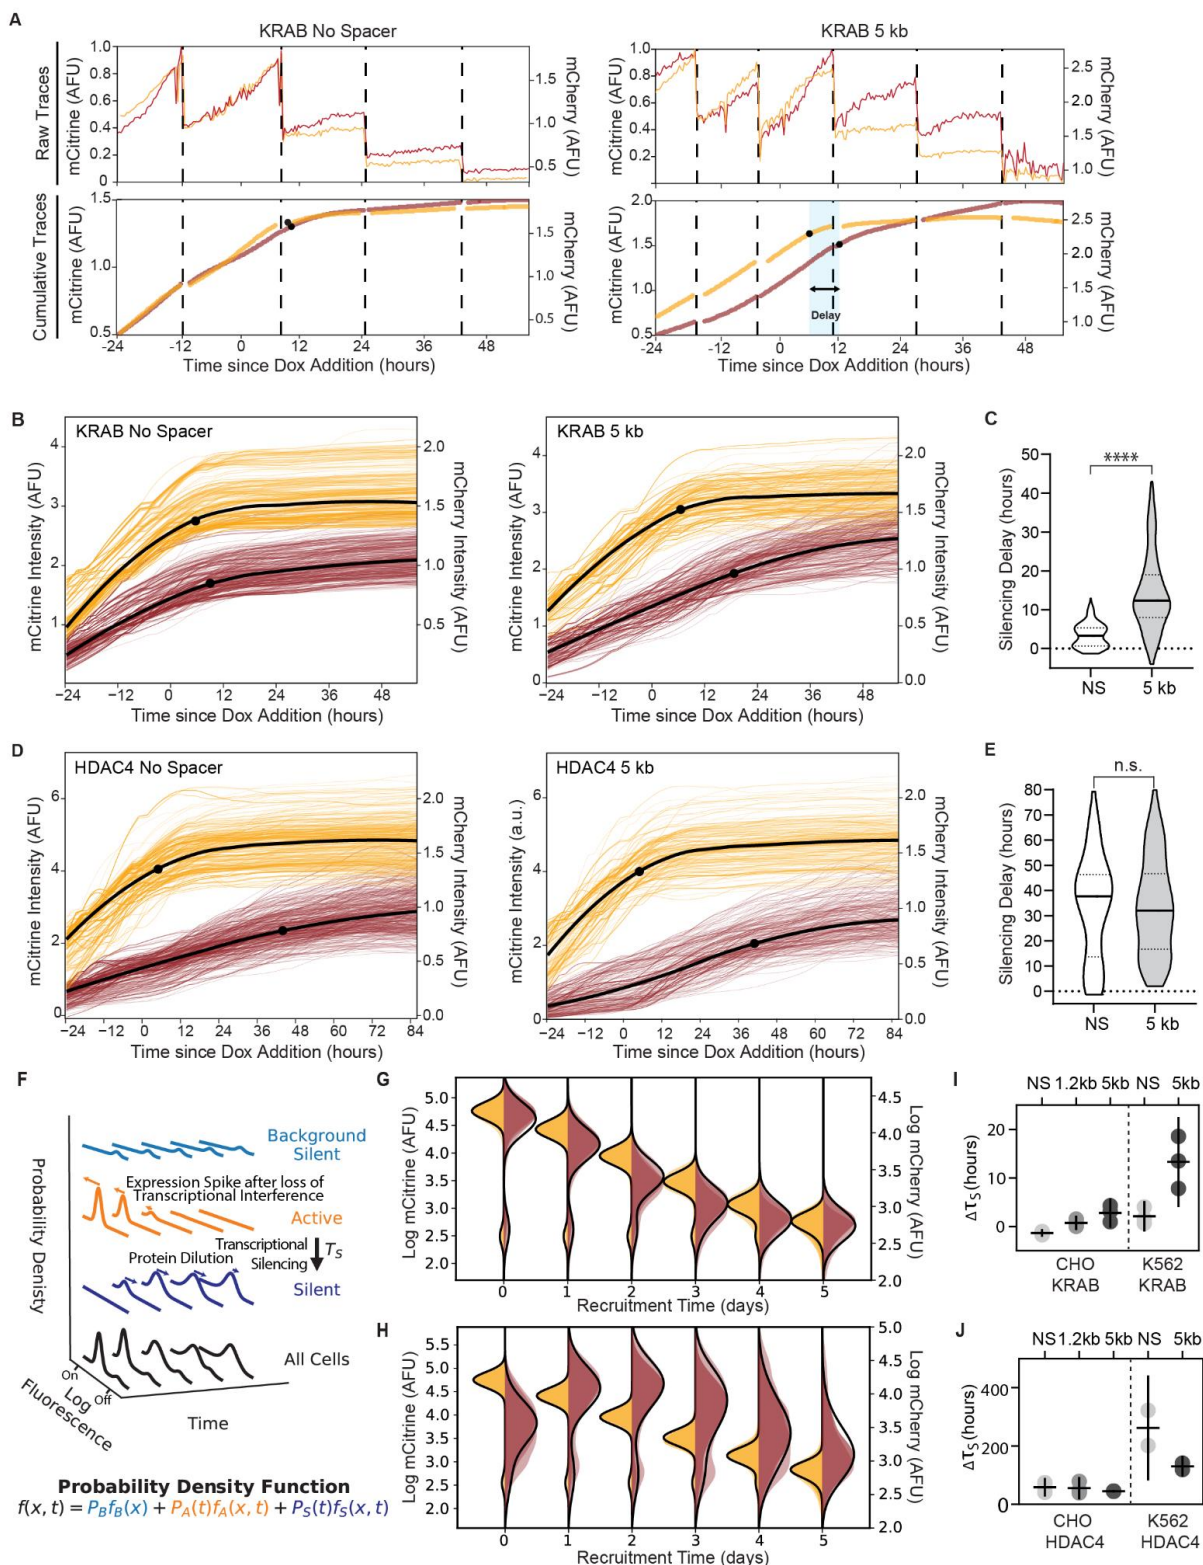

231  
 232 **Figure 3. Single-cell data measures delay in transcriptional silencing of the two genes. (A)**  
 233 (Top) Example raw traces measured by time-lapse microscopy showing total fluorescence of  
 234 mCitrine (yellow) and mCherry expression (red) as a function of time in an individual cell lineage  
 235 in CHO-K1 with the NS reporter (left) and 5kb reporter (right). Dotted lines denote cell divisions.

236 Recruitment of KRAB starts 24 hours by dox addition. (Bottom) Cumulative single-cell traces  
237 stitched across cell divisions showing estimated silencing time points (black dots, Materials and  
238 Methods) and silencing delay (blue shading). (B) Cumulative single-cell traces of mCitrine  
239 (yellow) and mCherry (red) in CHO-K1 cells with NS reporter (left, n=296) and 5kb reporter  
240 (right, n=218) with the mean trace (black curves) and median silencing times (dots) as a function  
241 of time since recruitment of KRAB by dox addition at time 0. (C) Distribution of delay times  
242 between silencing of mCitrine and mCherry in individual cells as shown in (A) after recruitment  
243 of KRAB in (NS reporter median silencing delay = 3.3 hours; 5kb reporter median silencing delay  
244 = 12.3 hours; statistically significant difference by Welch's unequal variances T-test). (D)  
245 Cumulative single-cell traces as a function of time relative to HDAC4 recruitment (NS, n= 211;  
246 5kb, n=291), as in (B). (E) Distribution of delay times after recruitment of HDAC4 (NS reporter  
247 median silencing delay = 38 hours; 5kb reporter median silencing delay = 32 hours; no statistically  
248 significant difference by Welch's unequal variances T-test). (F) A probabilistic model consisting  
249 of three states: background silent (light blue), active (orange), silent (dark blue). Each state has its  
250 own weight and distribution, and all states are summed to a final probability density function  
251 (black) that describes the probability  $f$  of finding a cell with fluorescence  $x$  at time  $t$ . This model  
252 is used to fit daily flow cytometry data to extract transcriptional silencing times ( $\tau_S$ ) upon CR  
253 recruitment, while taking into account: stochastic transitions of cells from the active to the silent  
254 state upon CR-mediated silencing, spike in expression after loss of transcriptional interference,  
255 and mRNA and protein degradation and dilution (Supplementary Text). (G, H) Overlaid daily  
256 distributions of mCitrine (transparent yellow) and mCherry (transparent red) fluorescence from  
257 flow cytometry during recruitment of (G) KRAB and (H) HDAC4 with average model fit (black  
258 line) (n=3). (I) Silencing delays between mCitrine and mCherry after KRAB recruitment extracted  
259 from daily flow cytometry time-courses using the model in (F) for different spreading reporters:  
260 NS, 1.2kb, 5kb. Each dot represents a clone for CHO-K1 (left) and a biological replicate for K562  
261 (right); horizontal bar is mean delay, vertical bar is 90% confidence interval from the fit estimated  
262 using the t-distribution (n=3). (J) Silencing delays between mCitrine and mCherry after HDAC4  
263 recruitment (CHO-K1, n=3 clones; K562 n=2 biological replicates); same notation as (H).

264  
265 **Figure 3 - figure supplement 1.** Example images and single-cell analysis of silencing dynamics  
266 from time-lapse microscopy of CHO-K1 cells.

267 **Figure 3 - figure supplement 2.** Dynamics of silencing measured by flow cytometry and fit by  
268 gene expression model.

269 **Figure 3 - figure supplement 3.** Steady-state expression in the absence of dox in CHO-K1  
270 versus K562 cells.

271 These small differences in temporal dynamics are likely due to differences in context of the  
272 reporters, both different genomic locus and cell type.

273

### 274 *The role of the cHS4 insulators in spreading of transcriptional silencing between genes*

275 Insulators are sequences shown to prevent transgene silencing and believed to stop  
276 spreading of repressive chromatin modifications<sup>32</sup>. The most commonly used insulator is cHS4;  
277 most of its insulator activity has been attributed to a 250bp core region<sup>13,33–36</sup> that is associated  
278 with increased histone acetylation<sup>37,38</sup>. To measure the role of the cHS4 insulator on blocking the  
279 spreading of targeted gene silencing, we built four different insulator configurations: a “single  
280 insulator” between the two genes using either the full length 1.2kb cHS4 (SH) or its 250bp core  
281 region (SC) (Figure 4A), or insulators flanking the mCitrine gene, referred to as “double insulator”  
282 (Figure 4B), with either full cHS4 (DH) or core region (DC). This double configuration is  
283 commonly used in mammalian cell engineering to prevent background silencing of transgenes due  
284 to position effect variegation<sup>12</sup>.

285 Surprisingly, no insulator configuration was capable of stopping KRAB-mediated  
286 spreading of silencing in either CHO-K1 or K562 cells (Figure 4C-D, Figure 4–figure supplement  
287 1A-B). Moreover, insulators do not delay KRAB-mediated silencing either: the estimated delay  
288 times in the insulator reporters are close to the delays in reporters with spacers (Fig 3F, Table S2).  
289 Therefore, these insulator configurations do not have a strong effect on silencing mediated by  
290 KRAB recruitment.

291 In CHO-K1 cells, no insulator configuration was able to inhibit spreading of silencing upon  
292 HDAC4 recruitment (Figure 4E, Figure 4–figure supplement 1C), and the small fraction of cells  
293 where mCherry is not silenced by day 5 of recruitment is similar to the spacer reporters (Figure 3–  
294 figure supplement 2B). Also similar to the spacer reporters, the fitted delay times ranged from 42–  
295 85 hours (Figure 4F right, Figure 4–figure supplement 1C). These delay times fall within the 90%  
296 confidence interval of the 1.2 kb lambda spacer (Table S2). Therefore, insulators do not appear to  
297 have a strong effect on HDAC4-mediated silencing at our reporters in CHO-K1 cells.

298 However, insulators do appear to attenuate HDAC4-mediated mCherry silencing in K562  
299 cells, even with 20 days of recruitment (Figure 3G&H, Figure 4–figure supplement 2). Rather than  
300 seeing complete silencing of the mCherry reporter, we see a broadening of the mCherry  
301 fluorescence distribution with the majority of cells expressing lower levels of mCherry than the  
302 population without dox, both at 5 and 20 days of HDAC4 recruitment to insulator constructs in



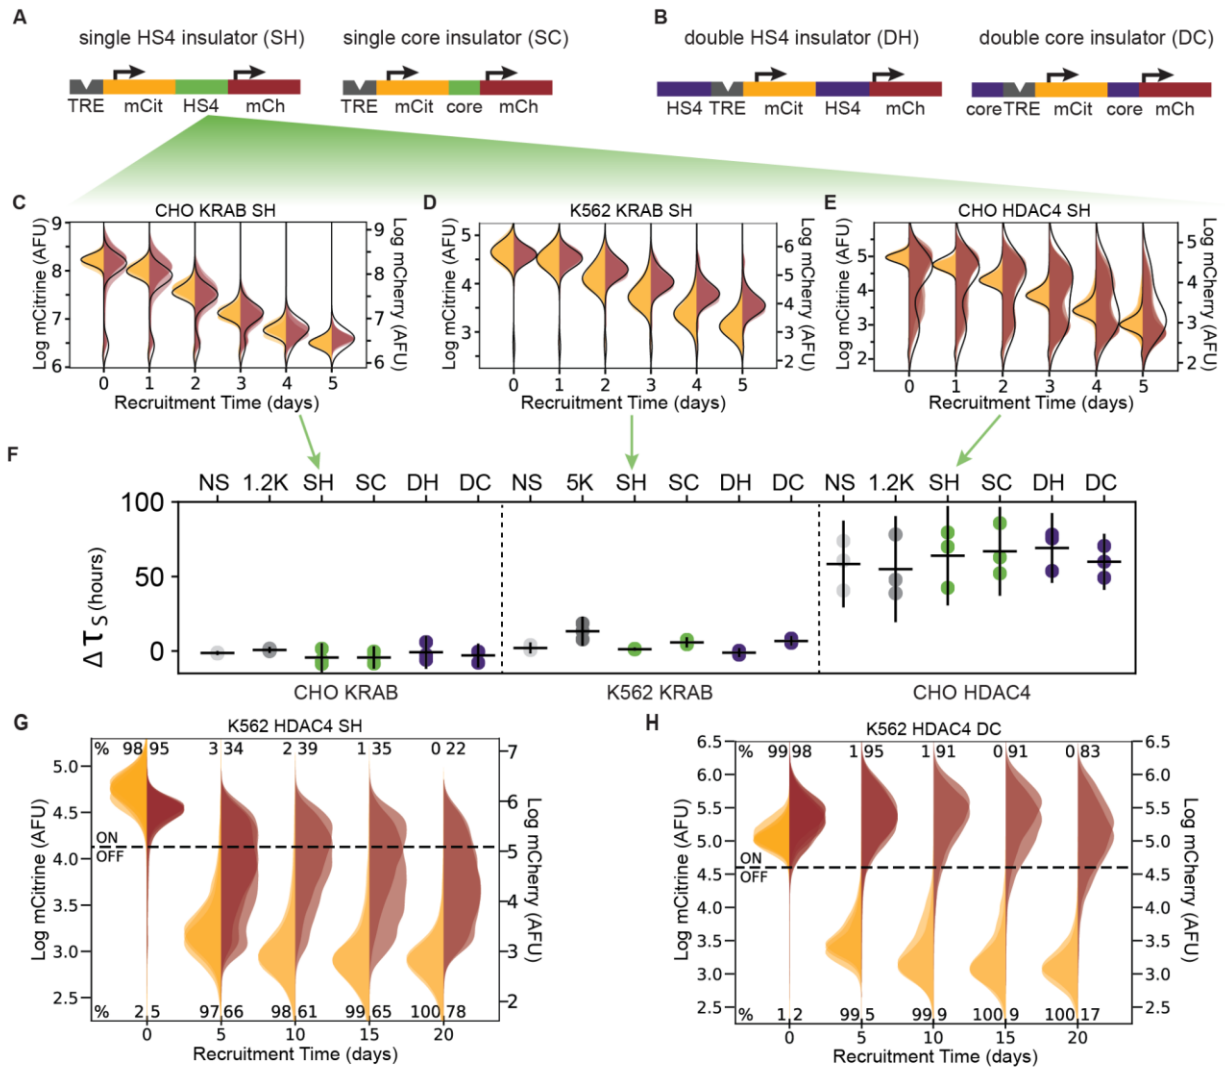

303

304 **Figure 4. The role of the cHS4 insulators in spreading of transcriptional silencing across**  
 305 **genes. (A)** Single insulator geometries between mCitrine (mCit) and mCherry (mCh) fluorescent  
 306 genes, with full 1.2kb HS4 insulator (SH, left) and 250 bp core insulator (SC, right). **(B)**  
 307 double insulator geometries with full length 1.2kb HS4 insulator (DH, left) and 250 bp core insulator (DC,  
 308 right) flanking the TRE-pEF-mCitrine region. **(C-E)** Overlaid replicates of daily distributions of  
 309 mCitrine (yellow) and mCherry (red) fluorescence from flow cytometry during recruitment of **(C)**  
 310 KRAB in CHO-K1, **(D)** KRAB in K562, or **(E)** HDAC4 in CHO-K1, to SH reporters with average  
 311 model fit (black line) (n=3). **(F)** Silencing delay times between mCitrine and mCherry in different  
 312 insulator reporters after chromatin regulator recruitment for 5 days (each dot is a replicate,  
 313 horizontal bar is mean delay, vertical bar is 90% confidence interval estimated using the t-  
 314 distribution). **(G-H)** Overlaid replicates of daily distributions of mCitrine (yellow) and mCherry  
 315 (red) fluorescence from flow cytometry during extended recruitment of HDAC4 to **(G)** SH reporter  
 316 or **(H)** DC reporter in K562 (n=3).

317

318 **Figure 4 - figure supplement 1.** The effect of all insulator configurations on spreading dynamics  
 319 of transcriptional silencing in CHO-K1 and K562.

- 320 **Figure 4 - figure supplement 2.** Insulators attenuate spreading of silencing via HDAC4 in  
321 K562.
- 322 **Figure 4 - figure supplement 3.** Dynamics of spreading upon weaker gene targeting insulator  
323 reporters with HDAC4 at lower dox concentrations in CHO-K1.
- 324 **Figure 4 - figure supplement 4.** Insulators do not block spreading of silencing with weaker gene  
325 targeting at lower dox concentrations.
- 326 **Figure 4 - figure supplement 5.** Insulators can prevent background silencing of reporter genes.



327 K562 (Figure 4G, Figure 4–figure supplement 2). An exception to this observation is the DC  
328 configuration, where the mCherry distribution remains in the ON range even after 20 days of  
329 HDAC4 recruitment (Figure 4H). The lack of complete mCherry silencing and broader mCherry  
330 distribution is in contrast to the silencing seen at the NS and 5kb reporters after 20 days of HDAC4  
331 recruitment in K562 (Figure 1H&J). These results suggest that the insulators can help the  
332 downstream gene remain active in conditions where its silencing is already slow, such as after  
333 indirect silencing by HDAC4 recruitment in K562.

334 To test if insulators can block weaker gene targeting by HDAC4 in CHO-K1 cells, we  
335 performed silencing experiments at non-saturating dox concentrations. At lower levels of dox,  
336 silencing of the two genes is slower; fits of daily flow cytometry data show silencing delay times  
337 that decrease upon increasing dox concentrations for all insulator configurations (Figure 4–figure  
338 supplement 3). At lower dox concentrations, fewer cells silence mCitrine by the end of 5 days, but  
339 those that do are likely to also silence mCherry for both HDAC4 and KRAB (Figure 4–figure  
340 supplement 4), showing that the insulators do not block spreading of silencing in CHO-K1 even  
341 with weaker CR targeting.

342 Although the cHS4 insulators do not generally prevent spreading of silencing during  
343 recruitment of CRs, the insulators are able to prevent spontaneous background silencing of the  
344 reporters in the absence of dox in CHO-K1 cells (Figure 4–figure supplement 5) consistent with  
345 previous transgene silencing reports<sup>34,39</sup>. Overall, levels of mCherry expression are higher in the  
346 insulator constructs (Figure 3–figure supplement 3), and there is no transcriptional run-on mRNA  
347 across the SH insulator (Supplementary Text, Figure 1–figure supplement 2E-F), suggesting it  
348 helps terminate transcription and prevent transcriptional interference as shown before<sup>40</sup>.

### 349 ***Reactivation of genes***

351 To understand the dynamics of neighboring gene coupling during transcriptional  
352 activation, we investigated the order of gene reactivation and the degree of epigenetic memory in  
353 our various two-gene constructs. We first silenced our various reporters with different spacers or  
354 insulators for five days, then removed dox to release the CR and monitored gene expression every  
355 few days by flow cytometry (Figure 5A). In CHO-K1 cells, while both genes reactivated  
356 simultaneously in the NS reporter (Fig 5B, Figure 5–figure supplement 1A&B), mCitrine  
357 reactivated first in the 5kb reporter (Figure 5C, Figure 5–figure supplement 1C&D), both after

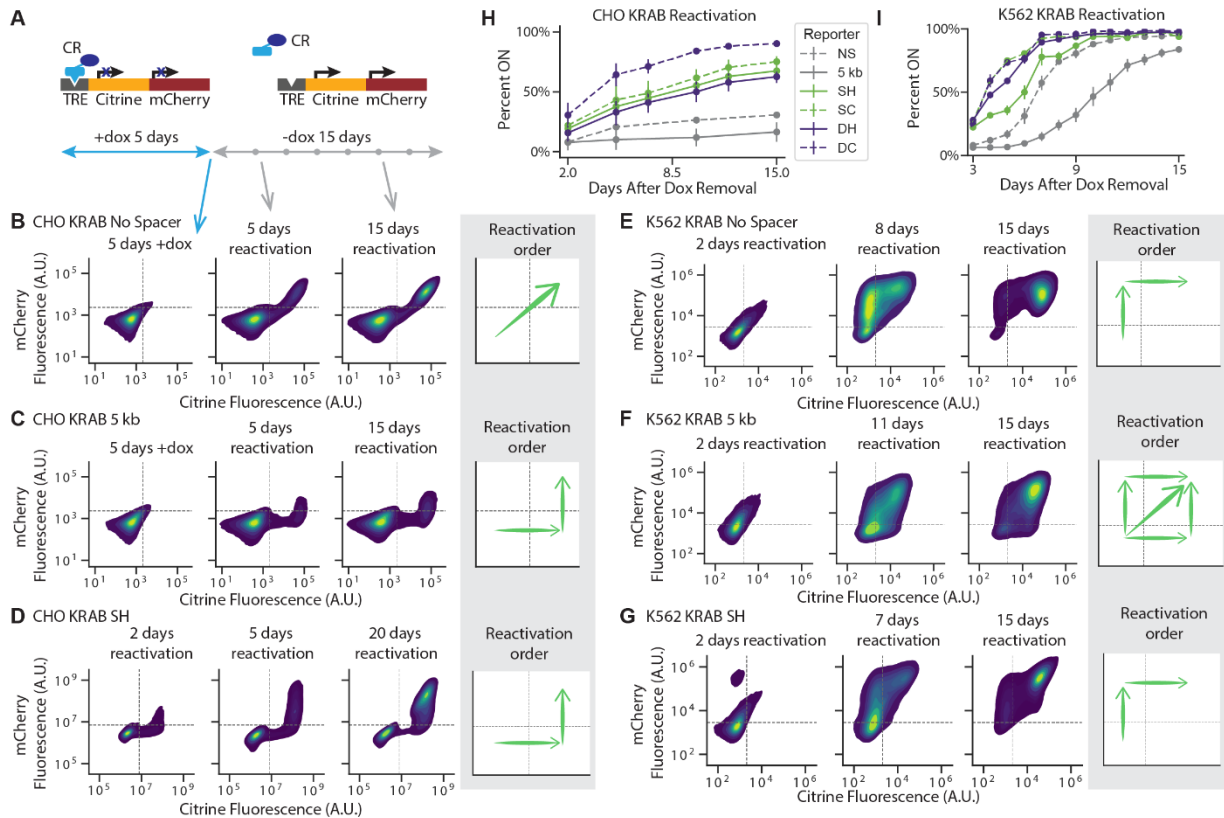

358

359 **Figure 5. Reactivation of gene expression spreads between the two genes. (A)** Schematic of  
 360 experimental setup: each CR is recruited upstream of the mCitrine gene for 5 days. Recruitment is  
 361 then stopped by removing dox and reactivation is monitored every few days by flow cytometry.  
 362 **(B-G)** 2D density plots of mCitrine and mCherry fluorescence from flow cytometry show pattern  
 363 of gene reactivation in: **(B)** CHO-K1 KRAB NS (n=3 clones), **(C)** CHO-K1 KRAB 5kb (n= 4  
 364 clones), **(D)** CHO-K1 KRAB SH (n=3), **(E)** K562 KRAB NS (n=3), **(F)** K562 KRAB 5kb (n=3),  
 365 and **(G)** K562 KRAB SH(n=3). **(H-I)** Percent of cells in which at least one reporter gene  
 366 reactivated over time after dox removal after KRAB release in **(H)** CHO-K1 and **(I)** K562.  
 367 Replicates are from either independent clonal cell lines, where indicated, or from biological  
 368 replicates of multiclonal populations.

369

370 **Figure 5 - figure supplement 1.** Reactivation of gene expression in CHO-K1 NS and 5kb  
 371 reporter lines.

372 **Figure 5 - figure supplement 2.** Reactivation of gene expression in CHO-K1 insulator reporter  
 373 lines.

374 **Figure 5 - figure supplement 3.** Reactivation of gene expression in K562 cell reporter lines.

375 release of KRAB or HDAC4. This pattern of a distance-dependent delay in reactivation between  
376 mCitrine and mCherry also holds for the insulator configurations for both KRAB and HDAC4: the  
377 full 1.2 kb long cHS4 configurations featured delayed mCherry reactivation (Figure 5D, Figure 5–  
378 figure supplement 2), compared to the more synchronous reactivation patterns observed in the 250  
379 bp long core insulator configurations (Figure 5–figure supplement 2). The order of reactivation  
380 suggests that in CHO-K1 cells reactivation initiates at the stronger pEF promoter that drives  
381 mCitrine, and spreads in a distance-dependent manner to the weaker pRSV-mCherry gene.

382 However, when looking at order of reactivation in K562 cells after release of KRAB, we  
383 found that for the NS reporter, mCherry reactivates first (Figure 5E), while with the 5kb reporter  
384 we observe three different scenarios in individual cells: either mCherry reactivates first, mCitrine  
385 reactivates first, or they reactivate together (Figure 5F). In the insulator constructs, mCherry  
386 reactivates before mCitrine in K562 cells (Figure 5G, Figure 5–figure supplement 3C). This  
387 change in reactivation pattern in K562 cells compared to CHO-K1 is likely due to the pRSV  
388 promoter being stronger in K562 (Figure 3–figure supplement 3).

389 Despite not preventing the spreading of silencing by KRAB, the insulators do play a role  
390 in the reactivation rate and level of memory. After release of rTetR-KRAB, reporters with  
391 insulators reactivated more rapidly compared to the NS and 5kb reporters, with the double core  
392 insulator exhibiting the highest degree of gene reactivation in both CHO-K1 and K562 cells (Figure  
393 5H). This is in line with the double core insulating elements also having the strongest insulating  
394 effect against mCherry silencing after HDAC4 recruitment in K562. Similarly, after removal of  
395 HDAC4 in CHO-K1 cells, insulators led both genes to reactivate to a higher extent (Fig 5I). These  
396 results show that the extent of epigenetic memory depends strongly not only on the chromatin  
397 regulator recruited, but also on the configurations of promoters and insulators at the target locus,  
398 with stronger promoters closely surrounded by core insulators diminishing memory.

399

#### 400 ***Model connecting chromatin states to gene expression dynamics***

401 We used our gene dynamics and chromatin modifications data to develop a generalizable  
402 kinetic model that captures distance-dependent silencing associated with a tethered chromatin  
403 regulator and distills the roles of promoters and insulators as elements associated with high  
404 reactivation rates. In this model, each gene can be either active or silent, leading to four possible  
405 states in our two-gene reporters (Figure 6A). Each gene can transition between active and silent  
406 states with rates that depend on the distance between itself and other DNA elements that recruit

407 chromatin regulators: the CR recruitment sites, promoters, and insulators. Under different  
408 experimental conditions, different rates in this kinetic pathway dominate, governing the transitions  
409 from one state to another. When KRAB is recruited upstream of pEF-mCitrine, silencing of the  
410 downstream pRSV-mCherry gene happens quickly (over hours) at a rate that decreases as the  
411 distance between pRSV-mCherry and pEF-mCitrine increases (Figure 6B,  $k_{s\_KRAB}(d)$ ), suggesting  
412 the distance-dependent silencing rates induced by KRAB dominate over the activation rates  
413 associated with the promoters and insulators (Figure 6B,  $k_a$  and  $k_{ins}$  respectively).

414 However, when HDAC4 is recruited upstream of pEF-mCitrine, we observe delayed  
415 silencing of pRSV-mCherry (over many days, compared to hours in KRAB) at a rate that does not  
416 change as a function of the distance between the two genes. We hypothesize that pRSV-mCherry  
417 silencing is not due to the direct action of the HDACs recruited upstream of the pEF, but rather  
418 due to background silencing (Fig 6C,  $k_{bs2}$ ) of pRSV by endogenous polycomb complexes as  
419 indicated by the appearance of H3K27me3 (Figure 2D&E, Figure 2–figure supplement 2B&C).

420 Because we see much less pRSV-mCherry background silencing when the upstream pEF-  
421 citrine is active (in the absence of dox), we conclude that when pEF is active, it can increase  
422 activity of the downstream pRSV and prevent it from background silencing (Figure 6D,  $k_{a1}(d)$ ).  
423 Once the pEF-mCitrine gene is silenced by HDAC4, it can no longer bolster the overall rate of  
424 reactivation at the pRSV-mCherry gene ( $k_{a1}(d)$  is missing in Figure 6C compared to 6D) and  
425 protect it against background silencing. This reasoning is also consistent with the observation that  
426 we see less background silencing of the pRSV promoter when it is closer to the pEF in the no  
427 spacer construct compared to the 5kb one in the absence of CR recruitment (Figure 1).

428 In summary, both silencing and reactivation rates are affected by the distance between two  
429 genes. Upon recruitment of KRAB, a CR associated with reader-writer feedback and spreading of  
430 silencing histone modifications, the silencing rate is maximal near its recruitment sites and  
431 decreases slowly with distance (Fig 6E). However, HDAC4 recruitment leads to histone  
432 deacetylation, which is not associated with reader-writer positive feedback, and therefore is  
433 expected to decrease quickly over distance (Fig 6E). We hypothesize that CRs that are associated  
434 with positive reader-writer feedback loops can directly affect nearby genes, while CRs without  
435 feedback can only indirectly affect neighboring genes by changing the state of promoters very  
436 close to the recruitment site, which can in turn influence farther genes.

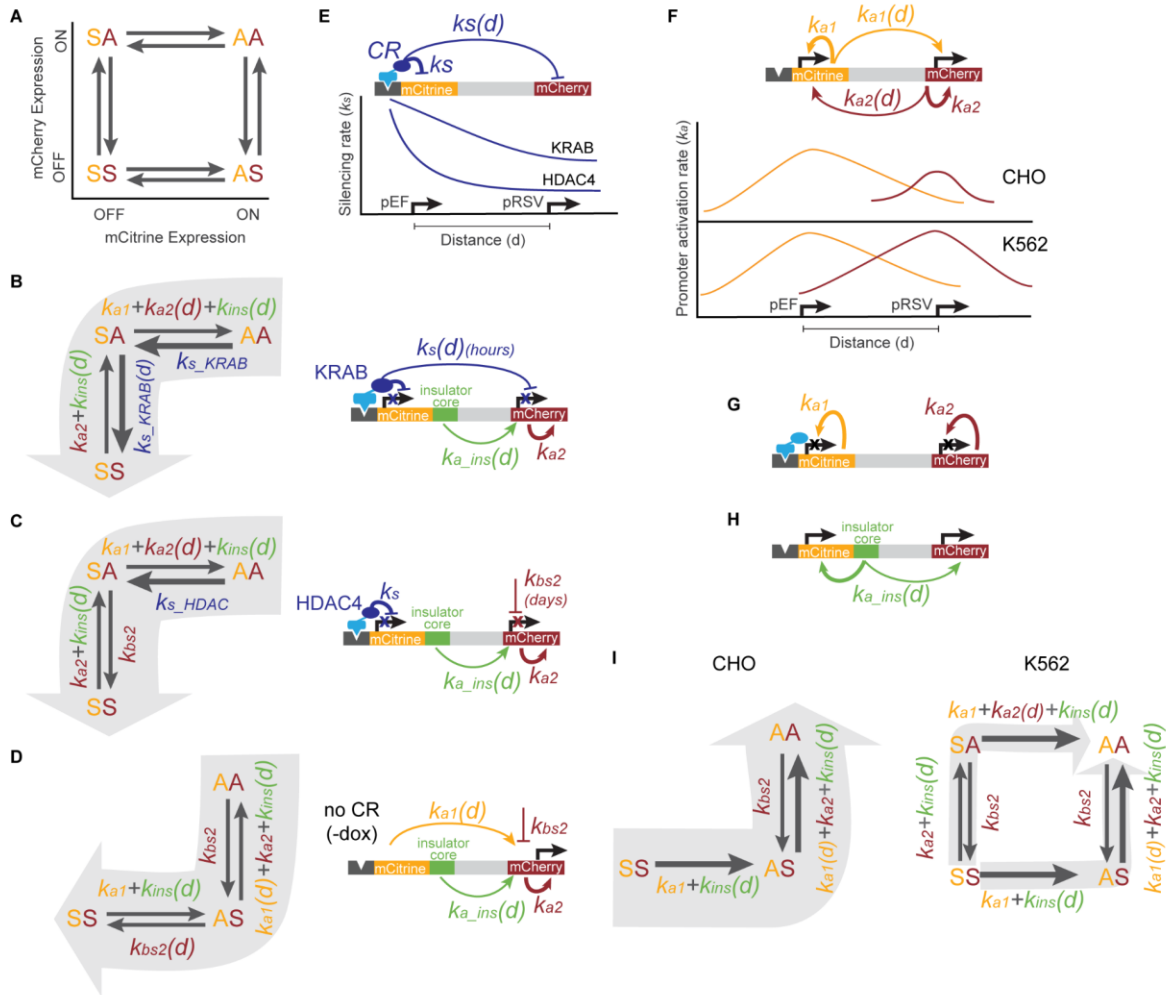

437

438 **Figure 6. Model of multi-gene control coordinated by the action of CRs, promoters, and**  
 439 **insulators.**

440 (A) Four states for a two-gene reporter, where the first letter (yellow) represents the mCitrine  
 441 state and the second letter (red) represents mCherry state, as either active (A) or silent (S).  
 442 Arrows represent the rates at which each gene is turned on or off. (B) During KRAB recruitment,  
 443 cells transition from both genes active (AA) to both gene silent (SS), with citrine silencing first  
 444 (SA intermediate state). The silencing rates of KRAB at the nearby pEF-mCitrine ( $k_{s\_KRAB}$ ) and  
 445 pRSV-mCherry ( $k_{s\_KRAB}(d)$ , where  $d$  is the distance between the pEF and pRSV promoters)  
 446 dominate over the activation rates of promoters ( $k_{a1}$ ,  $k_{a2}$ ) and insulators ( $k_{ins}(d)$ , where here  $d$  is  
 447 the distance between the core insulator and a nearby promoter). (C) During HDAC4 recruitment,  
 448 silencing of mCitrine (AA to SA) is driven by the silencing rate of HDAC4 ( $k_{s\_HDAC}$ ), while  
 449 silencing of mCherry (SA to SS) is driven by background silencing rate ( $k_{bs2}$ ). Both the pRSV  
 450 promoter ( $k_{a2}$ ) and insulator reactivation rates ( $k_{ins}$ ) can compete with pRSV-mCherry silencing.  
 451 (D) Before CR recruitment (no dox), pEF as well as insulators can act from a distance on pRSV  
 452 ( $k_{a1}(d)$ ,  $k_{a\_ins}(d)$ ) preventing background silencing of mCherry ( $k_{bs2}$ ). (E) KRAB can act on genes  
 453 over a long distance ( $k_s(d)$ ), silencing both mCitrine and mCherry, while the range of HDAC4  
 454 silencing is much smaller ( $k_s$ ), only directly affecting mCitrine. (F) In the absence of CR  
 455 recruitment, promoters can activate themselves ( $k_{a1}$ ,  $k_{a2}$ ), and maintain activity of genes at a  
 456 distance ( $k_{a1}(d)$ ,  $k_{a2}(d)$ ). In CHO-K1, pRSV is weaker than in K562. (G) When genes are

457 silenced, their promoters cannot act on neighboring genes, instead only reactivate themselves  
458 ( $k_{a1}, k_{a2}$ ). **(H)** Insulators can maintain activity of the nearby genes and drive reactivation after  
459 CR-mediated silencing ( $k_{ins}(d)$ ). **(I)** Reactivation after silencing is driven by gene activation rates  
460 ( $k_{a1}, k_{a2}$ ) along with insulators ( $k_{ins}(d)$ ) if present. In CHO-K1 cells where pEF is stronger than  
461 pRSV, mCitrine reactivates first followed by mCherry (left). However, in K562 where both  
462 promoters are equally strong, either gene can reactivate first (right).



463 Promoters can be thought of as regions that are associated with high rates of gene activation  
464 and can drive reactivation after silencing. In the absence of chromatin regulator recruitment, each  
465 gene drives its own activation and in addition drives the reactivation of the neighboring gene in a  
466 distance-dependent manner (Figure 6F, top). In CHO-K1 cells, the pEF is a stronger promoter than  
467 the pRSV, while in K562 their strengths are closer (Figure 6F bottom, Figure 3–figure supplement  
468 3). However, when a gene is silent, we are led to assume that the promoter can only reactivate  
469 itself and has no effect on reactivation of the adjacent gene until it is active again (Figure 6G). This  
470 assumption is necessary to explain why the silencing of pRSV after HDAC4 recruitment does not  
471 depend on its distance to the upstream silenced pEF promoter, even though an active pEF can  
472 increase pRSV reactivation in a distance dependent manner.

473 Similar to promoters, the core insulators can be modeled as DNA regions that increase the  
474 rate of reactivation of nearby genes in a distance-dependent manner (Figure 6H). This action,  
475 combined with the promoter reactivation rates, can prevent background gene silencing (Figure 6D)  
476 and drive reactivation after targeted CR-mediated silencing (Figure 6B&C). For example, because  
477 insulators increase reactivation rates, they can fight background silencing of the pRSV-mCherry  
478 both upon HDAC4 recruitment (Figure 6C), and under conditions without dox (Figure 6D). In  
479 K562, where the rate associated with pRSV activation is higher than in CHO-K1, the core  
480 insulators can bring the overall activation rate above background silencing when they are closer to  
481 pRSV. However, because the activation rates associated with insulators are small compared to  
482 KRAB-mediated silencing rates, they cannot insulate well against KRAB.

483 Thinking of promoters and core insulators as elements associated with higher reactivation  
484 rates also explains the distance-dependent gene reactivation after release of the chromatin  
485 regulators. When dox is removed after both genes are silenced, the reactivation dynamics are  
486 determined by the strength of the promoters and presence of insulators. In CHO-K1 cells, the  
487 stronger pEF gene and presence of any insulators leads to the reactivation of the mCitrine gene,  
488 which then can act at a distance to help reactivate the weaker pRSV-mCherry gene (Figure 6H,  
489 left). This leads to insulated reporters having the fastest reactivation and also explains the order of  
490 gene reactivation in the NS and 5kb reporters. In K562, where the strength of the pEF and pRSV  
491 promoters are more balanced, either gene can reactivate first and along with insulators drive  
492 reactivation of both genes (Figure 6H, right).

## 493 **Discussion**

494 Characterizing how transcriptional silencing mediated by CRs affects neighboring genes is  
495 important for understanding interactions between adjacent genes in the genome and in synthetic  
496 circuits, as well as for developing safe gene therapy and epigenetic editing applications. To tease  
497 out the rules associated with these interactions, we engineered a series of synthetic reporters with  
498 different configurations, changing the distance between genes and testing different insulator  
499 arrangements in two mammalian cell lines. These reporters allowed us to monitor the extent and  
500 dynamics of spreading of silencing during recruitment of a chromatin regulator, as well as  
501 reactivation patterns and dynamics after its release. Using time-lapse microscopy and flow  
502 cytometry, we found that transcriptional silencing of a gene following recruitment of either KRAB  
503 or HDAC4 can affect a downstream gene even when separated by 5kb of distance or different  
504 insulator arrangements. KRAB silencing, associated with both histone deacetylation and H3K9  
505 methylation, spreads with a delay that is very short (hours), increases with the distance between  
506 the genes, and is not affected by insulators. HDAC4 spreading, associated with histone  
507 deacetylation and H3K27me3, is slower (days) and does not depend on the distance between the  
508 genes. HDAC4-mediated silencing can also spread past insulators, though insulators seem to have  
509 a stronger effect on it, even blocking it in the DC configuration.

510 KRAB was previously shown to lead to spreading of both gene silencing and histone  
511 methylation when recruited near a gene as a fusion to either TetR<sup>19,20</sup> or to programmable DNA  
512 binding domains, such as dCas9<sup>41</sup> or TALENs<sup>17</sup>. However, the extent of reported spreading varied  
513 in different contexts between 5kb to 200kb. Our results suggest that spreading of KRAB-mediated  
514 silencing is a dynamic process that depends on the time of recruitment as well as the level of  
515 activation at the target locus, tying together these apparently disparate results. For example, when  
516 KRAB is recruited for a short period at a highly active region such as the hemoglobin locus in  
517 K562, the extent of spreading of methylation is very small (<1 kb)<sup>41</sup>. In contrast, when KRAB is  
518 recruited for a long period (41 days) at a site with moderate acetylation, silencing can spread over  
519 200kb<sup>20</sup>. Similarly, recruitment of HP1-alpha, a CR in the same silencing pathway as KRAB, has  
520 been shown to lead to silencing and spreading of H3K9me3 across ~10kb over time<sup>42</sup>.

521 The fact that KRAB-mediated silencing can spread to neighboring genes quickly raises two  
522 concerns for synthetic gene control and epigenetic editing. First, in mammalian genetic circuits  
523 where multiple genes need to be integrated in the same cell, genes controlled by KRAB need to be  
524 placed far away from other genes to avoid unwanted interference and feedback. Second, when

525 targeting endogenous genes with KRAB (as in CRISPRi), the possibility of silencing spreading  
526 beyond the target gene should be considered.

527 In contrast to KRAB, silencing by HDAC4 (and in general by HDACs) is not traditionally  
528 associated with spreading of heterochromatin in mammalian cells, so we were initially surprised  
529 to observe that silencing mediated by HDAC4 can affect neighboring genes. In general, spreading  
530 of heterochromatin-mediated silencing is commonly associated with reader-writer feedback,  
531 which has been shown to contribute to heterochromatin spreading in theoretical models<sup>43-46</sup> and  
532 synthetic experimental systems<sup>47</sup>. HDAC4 is not directly associated with CRs that can bind  
533 deacetylated histone tails; therefore, we did not expect to see new histone modifications after  
534 silencing. However, the appearance of H3K27me3, a PRC2 modification known to have reader-  
535 writer feedback, after HDAC4 recruitment led us to believe that the silencing of pEF-mCitrine  
536 allowed background silencing of pRSV-mCherry. This indirect silencing scenario could also arise  
537 upon silencing of endogenous promoters (for example in development, aging, or synthetic gene  
538 control), where their silencing would allow natural silencer elements in the gene neighborhood to  
539 suddenly start working.

540 We were surprised to discover that insulators were inefficient at blocking the spreading of  
541 chromatin-mediated targeted silencing, since insulators are traditionally thought to prevent  
542 spreading of heterochromatin and are commonly used in synthetic biology constructs to protect  
543 them from heterochromatin encroachment. None of the insulator variants derived from the cHS4  
544 region of the beta-globin locus prevented spreading of silencing after KRAB recruitment (Figure  
545 4). However, insulators did reduce background silencing of our reporters in CHO-K1 (Figure S11),  
546 consistent with results from classical transgene insulator assays<sup>34,39</sup>. We also showed that even a  
547 single insulator can stop transcriptional run-on (Figure S2), consistent with previous reports<sup>40</sup>. We  
548 can explain the function of insulators on spreading and background silencing by thinking of them  
549 as areas in an active chromatin state, that can for example recruit additional writers of acetylation<sup>38</sup>.  
550 We propose that active regions associated with high acetylation, such as insulators and promoters,  
551 cooperate with each other to inhibit deacetylation. According to this model, insulators fail when  
552 the gene reactivation driven by insulators is slower than the KRAB-induced repression and  
553 spreading of silencing. However, insulators can work against a much slower silencing process such  
554 as background silencing. In other words, at these length scales, the process of “insulation” is better  
555 thought of as a dynamic fight between activation and repression. Screening different insulators<sup>48</sup>  
556 in a similar recruitment assay in the future could help go beyond the binary classification of

557 sequences as insulators or non-insulators and actually quantify how well they perform against  
558 different mechanisms of silencing. This process would also help identify more reliable insulators  
559 for synthetic biology.

560 By monitoring gene reactivation dynamics after release of the CRs, we conclude that  
561 activation can also spread to nearby genes in a distance-dependent manner. However, which gene  
562 reactivates first depends not only on the distance between the genes, but also on their promoter  
563 size and strength and overall reactivation propensity of the locus. These results led us to modeling  
564 promoters and insulators as regions with increased rates of reactivation. In this model, acetylation  
565 from strong promoters, such as pEF, can spread via looping and positive feedback to the  
566 downstream weaker RSV promoter, as seen in CHO-K1 cells. This model can be used in other  
567 contexts in which spreading of active modifications is relevant, such as enhancer-promoter  
568 interactions, and activation of nearby endogenous genes after epigenetic editing.

569 Together, our experimental results and the model based on them have broad implications  
570 for understanding chromatin mediated gene regulation and building mammalian synthetic biology  
571 applications. They suggest that genes in close proximity (<5-10kb) can respond to signals in a  
572 coordinated manner, during both silencing and activation. In our model, promoters, enhancers, and  
573 insulators can be represented simply as regions with increased rates of reactivation. It would be  
574 interesting to extend the system to scenarios when these regulatory regions are farther apart in  
575 linear space but nevertheless close in 3D-space, as is the case of many promoters and their  
576 corresponding enhancers or silencers. In terms of synthetic biology applications, this gene  
577 coupling can be detrimental when we want to deliver compact circuits of genes that need to be  
578 controlled independently. However, the length-dependent time delay in gene response can also be  
579 used to build more sophisticated temporal population responses. Finally, this experimental and  
580 theoretical framework can serve as a starting point for measuring and modeling the effects of  
581 targeting various epigenetic editors at endogenous loci in order to guide the time necessary for  
582 efficient on-target effects without unwanted off-target spreading.

## 583 References

- 584 1. Bannister, A. J. & Kouzarides, T. Regulation of chromatin by histone modifications. *Cell*  
585 *Res.* **21**, 381–395 (2011).
- 586 2. Zhang, P., Torres, K., Liu, X., Liu, C.-G. & Pollock, R. E. An Overview of Chromatin-  
587 Regulating Proteins in Cells. *Curr. Protein Pept. Sci.* **17**, 401–410 (2016).
- 588 3. Jambhekar, A., Dhall, A. & Shi, Y. Roles and regulation of histone methylation in animal  
589 development. *Nat. Rev. Mol. Cell Biol.* **20**, 625–641 (2019).
- 590 4. Völker-Albert, M., Bronkhorst, A., Holdenrieder, S. & Imhof, A. Histone Modifications in  
591 Stem Cell Development and Their Clinical Implications. *Stem Cell Reports* **15**, 1196–1205  
592 (2020).
- 593 5. Zhao, Z. & Shilatifard, A. Epigenetic modifications of histones in cancer. *Genome Biol.* **20**,  
594 245 (2019).
- 595 6. Keung, A. J., Joung, J. K., Khalil, A. S. & Collins, J. J. Chromatin regulation at the frontier  
596 of synthetic biology. *Nat. Rev. Genet.* **16**, 159–171 (2015).
- 597 7. Thakore, P. I., Black, J. B., Hilton, I. B. & Gersbach, C. A. Editing the epigenome:  
598 technologies for programmable transcription and epigenetic modulation. *Nat. Methods* **13**,  
599 127–137 (2016).
- 600 8. Bintu, L. *et al.* Dynamics of epigenetic regulation at the single-cell level. *Science* **351**, 720–  
601 724 (2016).
- 602 9. Ayyanathan, K. *et al.* Regulated recruitment of HP1 to a euchromatic gene induces  
603 mitotically heritable, epigenetic gene silencing: a mammalian cell culture model of gene  
604 variegation. *Genes Dev.* **17**, 1855–1869 (2003).
- 605 10. Uckelmann, M. & Davidovich, C. Not just a writer: PRC2 as a chromatin reader. *Biochem.*  
606 *Soc. Trans.* **49**, 1159–1170 (2021).
- 607 11. Zhang, T., Cooper, S. & Brockdorff, N. The interplay of histone modifications – writers that  
608 read. *EMBO Rep.* **16**, 1467–1481 (2015).
- 609 12. Chung, J. H., Whiteley, M. & Felsenfeld, G. A 5' element of the chicken beta-globin  
610 domain serves as an insulator in human erythroid cells and protects against position effect in  
611 *Drosophila*. *Cell* **74**, 505–514 (1993).
- 612 13. Chung, J. H., Bell, A. C. & Felsenfeld, G. Characterization of the chicken beta-globin  
613 insulator. *Proc. Natl. Acad. Sci. U. S. A.* **94**, 575–580 (1997).
- 614 14. Guye, P., Li, Y., Wroblewska, L., Duportet, X. & Weiss, R. Rapid, modular and reliable  
615 construction of complex mammalian gene circuits. *Nucleic Acids Res.* **41**, e156 (2013).
- 616 15. Margolin, J. F. *et al.* Krüppel-associated boxes are potent transcriptional repression  
617 domains. *Proc. Natl. Acad. Sci. U. S. A.* **91**, 4509–4513 (1994).
- 618 16. Deuschle, U., Meyer, W. K. & Thiesen, H. J. Tetracycline-reversible silencing of eukaryotic  
619 promoters. *Mol. Cell. Biol.* **15**, 1907–1914 (1995).
- 620 17. Cong, L., Zhou, R., Kuo, Y.-C., Cunniff, M. & Zhang, F. Comprehensive interrogation of  
621 natural TALE DNA-binding modules and transcriptional repressor domains. *Nat. Commun.*  
622 **3**, 968 (2012).
- 623 18. Gilbert, L. A. *et al.* CRISPR-mediated modular RNA-guided regulation of transcription in  
624 eukaryotes. *Cell* **154**, 442–451 (2013).
- 625 19. Groner, A. C. *et al.* KRAB-zinc finger proteins and KAP1 can mediate long-range  
626 transcriptional repression through heterochromatin spreading. *PLoS Genet.* **6**, e1000869  
627 (2010).
- 628 20. Amabile, A. *et al.* Inheritable Silencing of Endogenous Genes by Hit-and-Run Targeted



- 629 Epigenetic Editing. *Cell* **167**, 219–232.e14 (2016).
- 630 21. O’Geen, H. *et al.* Ezh2-dCas9 and KRAB-dCas9 enable engineering of epigenetic memory  
631 in a context-dependent manner. *Epigenetics Chromatin* **12**, 26 (2019).
- 632 22. Gjaltema, R. A. F. *et al.* KRAB-Induced Heterochromatin Effectively Silences PLOD2  
633 Gene Expression in Somatic Cells and is Resilient to TGF $\beta$ 1 Activation. *Int. J. Mol. Sci.* **21**,  
634 (2020).
- 635 23. Groner, A. C. *et al.* The Krüppel-associated box repressor domain can induce reversible  
636 heterochromatinization of a mouse locus in vivo. *J. Biol. Chem.* **287**, 25361–25369 (2012).
- 637 24. Miska, E. A. *et al.* HDAC4 deacetylase associates with and represses the MEF2  
638 transcription factor. *EMBO J.* **18**, 5099–5107 (1999).
- 639 25. Wang, A. H. *et al.* HDAC4, a human histone deacetylase related to yeast HDA1, is a  
640 transcriptional corepressor. *Mol. Cell. Biol.* **19**, 7816–7827 (1999).
- 641 26. Belozero, V. E., Majumder, P., Shen, P. & Cai, H. N. A novel boundary element may  
642 facilitate independent gene regulation in the Antennapedia complex of *Drosophila*. *EMBO*  
643 *J.* **22**, 3113–3121 (2003).
- 644 27. Yamaguchi, S. *et al.* A method for producing transgenic cells using a multi-integrase system  
645 on a human artificial chromosome vector. *PLoS One* **6**, e17267 (2011).
- 646 28. Hockemeyer, D. *et al.* Genetic engineering of human pluripotent cells using TALE  
647 nucleases. *Nat. Biotechnol.* **29**, 731–734 (2011).
- 648 29. Shearwin, K. E., Callen, B. P. & Egan, J. B. Transcriptional interference--a crash course.  
649 *Trends Genet.* **21**, 339–345 (2005).
- 650 30. Skene, P. J., Henikoff, J. G. & Henikoff, S. Targeted in situ genome-wide profiling with  
651 high efficiency for low cell numbers. *Nat. Protoc.* **13**, 1006–1019 (2018).
- 652 31. Meers, M. P., Bryson, T. D., Henikoff, J. G. & Henikoff, S. Improved CUT&RUN  
653 chromatin profiling tools. *Elife* **8**, (2019).
- 654 32. Barkess, G. & West, A. G. Chromatin insulator elements: establishing barriers to set  
655 heterochromatin boundaries. *Epigenomics* **4**, 67–80 (2012).
- 656 33. West, A. G., Huang, S., Gaszner, M., Litt, M. D. & Felsenfeld, G. Recruitment of histone  
657 modifications by USF proteins at a vertebrate barrier element. *Mol. Cell* **16**, 453–463  
658 (2004).
- 659 34. Recillas-Targa, F. *et al.* Position-effect protection and enhancer blocking by the chicken  
660 beta-globin insulator are separable activities. *Proc. Natl. Acad. Sci. U. S. A.* **99**, 6883–6888  
661 (2002).
- 662 35. Gowher, H., Brick, K., Camerini-Otero, R. D. & Felsenfeld, G. Vezf1 protein binding sites  
663 genome-wide are associated with pausing of elongating RNA polymerase II. *Proc. Natl.*  
664 *Acad. Sci. U. S. A.* **109**, 2370–2375 (2012).
- 665 36. Yusufzai, T. M. & Felsenfeld, G. The 5’-HS4 chicken beta-globin insulator is a CTCF-  
666 dependent nuclear matrix-associated element. *Proc. Natl. Acad. Sci. U. S. A.* **101**, 8620–  
667 8624 (2004).
- 668 37. Mutskov, V. J., Farrell, C. M., Wade, P. A., Wolffe, A. P. & Felsenfeld, G. The barrier  
669 function of an insulator couples high histone acetylation levels with specific protection of  
670 promoter DNA from methylation. *Genes Dev.* **16**, 1540–1554 (2002).
- 671 38. Zhao, H. & Dean, A. An insulator blocks spreading of histone acetylation and interferes  
672 with RNA polymerase II transfer between an enhancer and gene. *Nucleic Acids Res.* **32**,  
673 4903–4919 (2004).
- 674 39. Pikaart, M. J., Recillas-Targa, F. & Felsenfeld, G. Loss of transcriptional activity of a  
675 transgene is accompanied by DNA methylation and histone deacetylation and is prevented  
676 by insulators. *Genes Dev.* **12**, 2852–2862 (1998).



- 677 40. Tian, J. & Andreadis, S. T. Independent and high-level dual-gene expression in adult stem-  
678 progenitor cells from a single lentiviral vector. *Gene Ther.* **16**, 874–884 (2009).
- 679 41. Thakore, P. I. *et al.* Highly specific epigenome editing by {CRISPR-Cas9} repressors for  
680 silencing of distal regulatory elements. *Nat. Methods* **12**, 1143–1149 (2015).
- 681 42. Hathaway, N. A. *et al.* Dynamics and memory of heterochromatin in living cells. *Cell* **149**,  
682 1447–1460 (2012).
- 683 43. Dodd, I. B., Micheelsen, M. A., Sneppen, K. & Thon, G. Theoretical Analysis of Epigenetic  
684 Cell Memory by Nucleosome Modification. *Cell* **129**, 813–822 (2007).
- 685 44. Hodges, C. & Crabtree, G. R. Dynamics of inherently bounded histone modification  
686 domains. *Proceedings of the National Academy of Sciences* **109**, 13296–13301 (2012).
- 687 45. Erdel, F. & Greene, E. C. Generalized nucleation and looping model for epigenetic memory  
688 of histone modifications. *Proc. Natl. Acad. Sci. U. S. A.* **113**, E4180–9 (2016).
- 689 46. Erdel, F. How Communication Between Nucleosomes Enables Spreading and Epigenetic  
690 Memory of Histone Modifications. *Bioessays* **39**, 1–12 (2017).
- 691 47. Park, M., Patel, N., Keung, A. J. & Khalil, A. S. Engineering Epigenetic Regulation Using  
692 Synthetic Read-Write Modules. *Cell* vol. 176 227–238.e20 (2019).
- 693 48. Rudina, S. S. & Smolke, C. D. A Novel Chromatin-Opening Element for Stable Long-term  
694 Transgene Expression. *bioRxiv* 626713 (2019) doi:10.1101/626713.
- 695 49. Sprinzak, D. *et al.* Cis-interactions between Notch and Delta generate mutually exclusive  
696 signalling states. *Nature* **465**, 86–90 (2010).
- 697 50. Sanjana, N. E. *et al.* A transcription activator-like effector toolbox for genome engineering.  
698 *Nat. Protoc.* **7**, 171–192 (2012).
- 699 51. Oceguera-Yanez, F. *et al.* Engineering the AAVS1 locus for consistent and scalable  
700 transgene expression in human iPSCs and their differentiated derivatives. *Methods* **101**, 43–  
701 55 (2016).
- 702 52. Janssens, D. & Henikoff, S. CUT&RUN: Targeted in situ genome-wide profiling with high  
703 efficiency for low cell numbers v3 (protocols.io.zcpf2vn). *protocols.io* (2019)  
704 doi:10.17504/protocols.io.zcpf2vn.
- 705 53. Hawkins, R. D. *et al.* Distinct epigenomic landscapes of pluripotent and lineage-committed  
706 human cells. *Cell Stem Cell* **6**, 479–491 (2010).
- 707 54. Adhya, S. & Gottesman, M. Promoter occlusion: transcription through a promoter may  
708 inhibit its activity. *Cell* **29**, 939–944 (1982).
- 709 55. Eszterhas, S. K., Bouhassira, E. E., Martin, D. I. K. & Fiering, S. Transcriptional  
710 interference by independently regulated genes occurs in any relative arrangement of the  
711 genes and is influenced by chromosomal integration position. *Mol. Cell. Biol.* **22**, 469–479  
712 (2002).
- 713 56. Yamaguchi, S. *et al.* A method for producing transgenic cells using a multi-integrase system  
714 on a human artificial chromosome vector. *PLoS One* **6**, e17267 (2011).

## 715 **Acknowledgements**

716 We would like to thank the members of the Bintu lab for discussions and helpful feedback, as well  
717 as Mike V. Van for cloning some CR plasmids. We especially thank Stanley Qi's Lab for use of  
718 the Cytoflex cytometer, Mitsuo Oshimura's Lab for the MI-HAC and phiC31 integrase, and  
719 Brooks Taylor (Mary Teruel's Lab) for use of his cell-tracking software. This work was supported  
720 by a BWF-CASI Award (L.B.), NIH-NIGMS R35M128947 (L.B.), NIH-NIGMS Training Grant  
721 in Biotechnology 5T32GM008412 (S.L.), Japan Society for the Promotion of Science Overseas  
722 Research Fellowship (T.F.), NIH-NIGMS T32 Molecular Pharmacology Training Grant  
723 5T32GM113854 (J.S.), NSF GRFP, VPGE Stanford Graduate Fellowship and VPGE EDGE  
724 Fellowship (M.M.H.), and NIH T32 Training Grant 5T32GM007365-45 (A.M).

725

## 726 **Author Contributions**

727 S.L. and L.B. designed the study. S.L., M.H.H. and L.B. generated the DNA constructs and cell  
728 lines. S.L. and M.H.H. performed the flow cytometry experiments and associated data analysis  
729 with contributions from M.M.H., C.H.L., A.M. and L.B.. C.H.L. performed the CUT&RUN and  
730 associated analysis with contributions from S.L.. RNA extractions and subsequent analysis was  
731 performed by S.L. and M.M.H.. S.L. collected time-lapse microscopy data for which analysis was  
732 performed by J.S.. Model for time evolution of fluorescence distribution was derived by M.H.H.,  
733 with input from L.B, and fit to flow cytometry data by M.H.H. Kinetic model of gene states was  
734 developed by L.B., S.L. and T.F.. S.L. and L.B. wrote the manuscript with contributions from all  
735 authors.

736 **Competing interests:** Authors declare that they have no competing interests.

737 **Data and materials availability:** All data, code, and materials used in the analysis will be publicly  
738 available upon publication.

## 739 **Supplementary Materials**

740 Materials and Methods

741 Supplementary Text

742 Supplementary Figures

743 Tables S1 to S2

744 Movies S1 to S4

745

## 746 **Materials and Methods**

747

### 748 **Plasmid construction**

749 The CHO-K1 PhiC31 reporters (Figure S1A) were assembled as follows: First, a PhiC31-Neo-  
750 5xTetO-pEF-H2B-mCitrine reporter construct was assembled using a backbone containing the  
751 PhiC31 attB site, a neomycin resistance gene, and a multiple cloning site<sup>27</sup>. The elements of the  
752 reporter constructs were PCR amplified from the following sources: five Tet binding sites from  
753 the TRE-tight plasmid (Clontech), pEF from pEF/FRT/V5-Dest (Life Technologies), and H2B-  
754 citrine from pEV2-12xCSL-H2B-mCitrine<sup>49</sup>. These components were first sequentially cloned  
755 into the pExchange1 backbone using standard molecular biology techniques. The entire TRE-pEF-  
756 H2B-mCitrine was then PCR-amplified and combined by Gibson assembly with the phiC31-  
757 Neomycin-MCS backbone cut by AvrII. This construct was designed such that after integration,  
758 the neomycin gene would be expressed from a PGK promoter situated upstream of the phiC31 site  
759 in the MI-HAC<sup>27</sup>. The second fluorescent reporter was added by digesting the mCitrine only  
760 plasmid with NdeI and adding: the pRSV-H2B from R4-blast-pRSV-H2B- mTurquoise (gift from  
761 Teruel Lab), mCherry from pEx1-pEF-H2B-mCherry-T2A-rTetR-EED (Addgene #78101), and  
762 polyA from PhiC31-Neo-ins-5xTetO-pEF-H2B-Citrine-ins (Addgene #78099) using Gibson  
763 Assembly to generate the NS construct. The lambda spacers were amplified from lambda phage  
764 DNA (NEB, N3011) and inserted via Gibson Assembly after digesting the NS reporter plasmid  
765 with BsmB1. Similarly, the full length cHS4 was amplified from PhiC31-Neo-ins-5xTetO-pEF-  
766 H2B-Citrine-ins (Addgene #78099) or the core insulator was amplified from PB CMV-MCS-  
767 EF1 $\alpha$ -Puro PiggyBac vector backbone (System Biosciences #PB510B-1), and inserted into the NS  
768 reporter with Gibson assembly after digestion with BsmBI for insulators between mCitrine and  
769 mCherry, and BsiWI (restriction digestion site added by site directed mutagenesis) for the  
770 insulators upstream of TRE. The PhiC31 integrase was a gift from the Oshimura Lab<sup>27</sup>.

771

772 The K562 AAVS1 reporter constructs (Figure S1B) were assembled as follows: First, a 9xTetO-  
773 pEF-H2B-Citrine reporter was cloned into a AAVS1 donor vector backbone (Addgene #22212)  
774 containing a promoter-less splice-acceptor upstream of a puromycin resistance gene and homology  
775 arms against the AAVS1 locus. The elements of the reporter were amplified from the following  
776 sources: the 9XTetO sites were ordered from IDT, and the pEF-H2B-citrine was PCR amplified  
777 from the PhiC31 construct. These components were cloned into the AAVS1 donor vector

778 backbone using Gibson Assembly. The mCherry components, spacers and insulators were added  
779 to the mCitrine only base plasmid in the same manner as the phiC31 reporters (see above), except  
780 for insulators where plasmids were digested with BstBI and MluI-HF.

781  
782 The Piggybac plasmids containing the rTetR-CR were assembled into the PB CMV-MCS- EF1 $\alpha$ -  
783 Puro PiggyBac vector backbone (System Biosciences #PB510B-1), which was modified via  
784 Gibson Assembly to add H2B-rTetR-Zeo from pEx1-pEF-H2B-mCherry-T2A-rTetR-KRAB- Zeo  
785 (Addgene #78352), mIFP from pSLQ2837-1, and for K562 plasmids the pGK promoter from  
786 pSLQ2818 (the latter two gifted from Tony Gao & Stanley Qi, Stanford). The CRs used were: rat  
787 KRAB from pEx1-pEF-H2B-mCherry-T2A-rTetR-KRAB (Addgene #78348) for CHO-K1,  
788 human KRAB ZNF10 from pSLQ2815 CAG-Puro-WPRE\_PGK-KRAB-tagBFP-dCas9 (gifted  
789 from Tony Gao & Stanley Qi, Stanford) for K562, and human HDAC4 from pEx1-pEF-H2B-  
790 mCherry- T2A-rTetR-HDAC4 (Addgene #78349) for both CHO-K1 and K562.

791

792 All plasmids used in this study will be deposited to Addgene.

793

#### 794 **Cell Line Construction**

795 Reporter lines in CHO-K1 cells were created by integrating the reporter plasmids at the phiC31  
796 integration site on the MI-HAC (human artificial chromosome, gifted by Oshimura Lab) by co-  
797 transfecting 750 ng of reporter plasmid with 250 ng of the phiC31 integrase using Lipofectamine  
798 2000 (Invitrogen, 11668027). Cells were plated 24 hours before transfection and media change  
799 was performed 12 hours after transfection. Selection was started 48 to 72 hours after transfection  
800 with 600 ng/mL geneticin (Gibco, 10131027) for one to two weeks. CRs were integrated randomly  
801 with the Piggybac system (System Biosystems, PB210PA-1) by co-transfecting 750 ng of CR  
802 plasmid and 250 ng PiggyBac transposase with Lipofectamine 2000. Cells were selected with 400  
803 ng/mL Zeocin starting 24 hours or later after transfection for one to two weeks. Single clones were  
804 isolated for each lambda reporter, and correct integration into the MI-HAC was verified by PCR  
805 of genomic DNA. Note that rat KRAB was used for CHO-K1 cells and human KRAB ZFN10 was  
806 used for K562; both are driven by CMV promoter and have mIFP as a fluorescent marker followed  
807 by T2A before the rTetR-CR fusion.

808

809 Reporters were integrated in K562 cells at the AAVS1 safe harbor site using TALENs: AAVS1-  
810 TALEN-L (Addgene #35431) targeting 5'-TGTCCCCTCCACCCACACA-3' and AAVS1-TALEN-  
811 R (Addgene #35432) targeting 5'-TTTCTGTCACCAATCCTG-3'<sup>50</sup>. Roughly 1.2M K562 cells  
812 mixed with 5000 ng of reporter plasmid and 1000 ng of each left and right TALENS in a  
813 nucleofection cuvette (Mirus Bio, 50121), were transfected by nucleofection (Lonza 2B  
814 Nucleofector) with program T-16. Selection was started 48 to 72 hours after transfection with 3  
815 ug/mL Puromycin (Invivo Gen, ant-pr) for one to two weeks. We performed genomic PCR on  
816 K562 multiclonal populations to confirm the presence of proper integration at the AAVS1 site,  
817 using primers from<sup>51</sup>. CRs were integrated randomly with the Piggybac system by nucleofecting  
818 1000 ng of CR plasmid and 300 ng PiggyBac. Cells were selected with 400 ng/mL Zeocin starting  
819 24 hours or later after transfection for one to two weeks.

820 Both CHO-K1 and K562 reporter cell lines with CRs were sorted (Sony SH800) for triple positive  
821 fluorescence: mCitrine and mCherry of the dual gene reporter and mIFP transcribed along with  
822 the CR.

### 823 **Cell Culture Conditions**

824 Cells were cultured at 37°C in a humidified incubator (Panasonic MCO-230AICUVL) with 5%  
825 CO<sub>2</sub>. CHO-K1 cells were grown in Alpha MEM Earle's Salts media with 10% Tet Approved FBS  
826 (Takara Bio 631367, Lots # A16039 & #17033) and 1X Penicillin/Streptomycin/L-glutamine  
827 (Gibco 10378016). CHO-K1 cells were passaged by rinsing with Dulbecco's Phosphate-Buffered  
828 Saline (DPBS, Gibco 14190250), and incubating at room temperature with 0.25% Trypsin (Gibco,  
829 25200056). K562 cells were grown in RPMI 1640 medium (Gibco, 11875119) with 10% Tet  
830 Approved FBS (Takara Bio 631367, Lot #17033) and 1X Penicillin/Streptomycin/L-glutamine  
831 (Gibco 10378016). For long-term storage, cells were frozen in growth media with 10% DMSO  
832 (Sigma Aldrich, D2650) and placed at -80°C (for up to a month), and then transferred to liquid  
833 nitrogen for long term storage.

### 834 **Flow Cytometry of Recruitment and Release Assays**

835 During recruitment assays, doxycycline (Tocris Bioscience, 4090) was added to the media to a  
836 final concentration of 1000 ng/mL unless otherwise stated. Fresh dox diluted from frozen aliquots  
837 was added to the media before each cell passage during recruitment, every 2-3 days. Flow  
838 cytometry data was collected on two different flow cytometers due to machine access: CytoFLEX

839 S (Beckman Coulter) and ZE5 Cell Analyzer (BioRad). Cells were filtered through 40 um strainers  
840 to remove clumps before flow, and 10,000-30,000 cells were collected for each time point. For  
841 CHO-K1 NS and 5kb clonal lines were used for replicates; for the remaining multiclonal  
842 constructs, data for each time course was collected from experiments started on different days for  
843 use as biological replicates. Data was analyzed using a Matlab program called EasyFlow  
844 (<https://antebilab.github.io/easyflow/>) and a Python-based package, Cytoflow  
845 (<https://cytoflow.github.io/>). All cells were gated for mIFP positive cells based on fitting the  
846 background fluorescence of wildtype cells to a sum of Gaussians, and setting the threshold 2  
847 standard deviations away from the mean of the main peak. The percentages of cells with mCitrine  
848 and mCherry active (Figure 1) were determined using a manual threshold based on the no dox  
849 sample. To quantify the percent of cells with mCitrine or mCherry ON during reactivation (Figure  
850 5&S13&S14), we fit the background fluorescence of wildtype cells in each fluorescent channel to  
851 a sum of Gaussians and set the ON threshold 3 standard deviations away from the mean of the  
852 main peak.

### 853 **CUT&RUN Experiments**

854 CUT&RUN for the K562 KRAB and CHO-K1 KRAB cell lines was performed according to the  
855 third version of the published protocol on protocols.io<sup>52</sup>. For each antibody condition, 250,000  
856 K562 or CHO-K1 cells were harvested and incubated with 10uL of activated Concanavalin A  
857 beads. Cells were permeabilized with 0.05% digitonin and incubated at room temperature for two  
858 hours with a 1:100 dilution of one of the following antibodies: guinea pig anti-rabbit IgG H&L  
859 chain (Antibodies-Online; Cat. No.: ABIN101961); rabbit anti-H3ac (Active Motif; Cat. No.:  
860 39139); rabbit anti-H3K4me3 (Active Motif; Cat. No.: 39159); rabbit anti-H3K9me3 (Abcam;  
861 Cat. No.: ab8898). Unbound antibody was washed out, and cells were incubated with 140ng/mL  
862 of a protein A and micrococcal nuclease fusion (pA-MNase; generously provided by the Henikoff  
863 lab). Unbound pA-MNase was washed out, and cells were resuspended in a low-salt buffer. Tubes  
864 were placed in a thermal block chilled to 0°C, and 10mM CaCl<sub>2</sub> was added to trigger DNA  
865 cleavage by pA-MNase. After 5 minutes, the reaction was stopped by chelating calcium ions with  
866 the addition of 20mM EGTA, and tubes were incubated at 37°C for 30 minutes under physiological  
867 salt conditions to promote diffusion of fragmented chromatin into the supernatant. Fragmented  
868 chromatin in the supernatant was collected and purified using the DNA Clean & Concentrator-5  
869 kit (Zymo; Cat. No.: D4004). CUT&RUN for the CHO-K1 HDAC4 cell lines was performed using



870 the EpiCypher CUTANA ChIC/CUT&RUN Kit (Cat. No.: 14-1048) according to the User Manual  
871 Version 2.0 with the following conditions: an input of 500,000 CHO-K1 cells per antibody  
872 condition; a final digitonin concentration of 0.01%; an overnight antibody incubation at 4°C with  
873 1:100 dilutions of the anti-H3Kac and anti-H3K9me3 antibodies described above along with a  
874 1:50 dilution of rabbit anti-H3K27me3 (Cell Signaling Technologies, Cat. No: 9733S); and DNA  
875 purification with the provided spin columns. Dual-indexed sequencing libraries were prepared  
876 using the NEBNext Ultra II DNA Library Prep Kit for Illumina (New England Biolabs; Cat. No.:  
877 E7645L) with 12-14 cycles of PCR, and size selection was performed with either Agencourt  
878 AMPure XP (Beckman Coulter; Cat. No.: A63880) or SPRIselect (Beckman Coulter; Cat. No.:  
879 B23318) magnetic beads. Library concentrations were quantified with the Qubit 1X dsDNA HS  
880 Assay Kit (Invitrogen; Cat. No.: Q33231), and library fragment sizes were assessed with the High  
881 Sensitivity D1000 ScreenTape (Agilent; Cat. No.: 5067-5584) and High Sensitivity D1000  
882 Reagent (Agilent; Cat. No.: 5067-5585) on an Agilent 4200 TapeStation System. Libraries were  
883 pooled for genome-wide sequencing.

884

### 885 **CUT&RUN Sequencing, Data Processing, and Data Analysis**

886 Genome-wide libraries were paired-end sequenced by the Stanford Center for Genomics and  
887 Personalized Medicine on a HiSeq 4000 with 2 x 101 cycles. A custom genome with our reporter  
888 sequence appended to the end of the hg19 human genome assembly was constructed with bowtie2-  
889 build. Paired-end alignment was performed with the following bowtie2 command: bowtie2 --local  
890 --very-sensitive-local --no-unal --no-mixed --no-discordant --phred33 -I 10 -X 700 -x {reference  
891 genome} -p 8 -1 {first mate of pair} -2 {second mate of pair} -S {output SAM file name}.  
892 Fragments that mapped completely within non-unique reporter elements (i.e. pEF, H2B, PGK,  
893 AmpR, or SV40 polyA) were ambiguous and thus removed to avoid confounding. Samtools was  
894 used to convert SAM files to BAM files and to subsequently sort and index BAM files. Picard was  
895 used to mark and remove duplicates with the following command: java -jar {picard tool}  
896 MarkDuplicates -I {input sorted BAM file} -O {output deduplicated BAM file} -M {output  
897 metrics file} --REMOVE\_DUPLICATES true. Reads were normalized to counts per million  
898 (CPM) and bedgraph files were generated with the following bamCoverage command:  
899 bamCoverage --bam {input deduplicated BAM file} -o {output bedgraph file} --outFileFormat  
900 bedgraph --extendReads --centerReads --binSize 10 --normalizeUsing CPM. \CUT&RUN data

901 were visualized via the Broad Institute and UC San Diego Integrative Genomics Viewer.  
902 Additional data analyses and visualization were performed with custom scripts in Python.

903  
904 ChromaBlocks analysis<sup>53</sup> was performed in R using the Repitools package. Normalized bedgraph  
905 files were read in as dataframes and converted to GRangesList objects with the annoDF2GR() and  
906 GRangesList() methods. GRangesList objects for H3K9me3, H3Kac, or H3K4me3 samples were  
907 specified for the rs.ip argument within the ChromaBlocks() method, and the respective dox-treated  
908 or untreated IgG sample was specified as the rs.input argument. ChromaBlocks() was called with  
909 the ‘large’ preset for H3K9me3 and H3Kac and with the ‘small’ preset for H3K4me3 to identify  
910 regions of enrichment. Start coordinates and widths of enriched regions were used to construct bed  
911 files for visualization in IGV and for signal integration to compute the log<sub>2</sub> fold-change in Figure  
912 S1E.

913

#### 914 **qPCR and PCR on cDNA**

915 Each cell line was treated with dox (1ug/mL) for the indicated number of days before harvesting.  
916 RNA was harvested using RNeasy Mini Kit (Qiagen, 74106) using the on-column RNase-Free  
917 DNase (Qiagen, 79254). cDNA was synthesized using the iScript Reverse Transcription Supermix  
918 (Biorad, 1708840) for qPCR experiments and qScript cDNA SuperMix (VWR, 101414-106) for  
919 PCR experiments. qPCR on cDNA was performed using SsoFast EvaGreen Supermix on a CFX  
920 Connect Real-Time PCR System (both from Bio-Rad Laboratories). For qPCR primer sequences,  
921 see Table S1. The values are reported as delta Ct to Beta-actin. PCR on cDNA was performed  
922 using Q5 Hot Start High-Fidelity 2X Master Mix (NEB, M0494L) on a C1000 Touch Thermal  
923 Cycler from Bio-Rad. PCR products were run on a 1-1.5% TAE agarose gel at room temperature  
924 and imaged using Biorad Gel Doc EZ Imager. For PCR primer sequences, see Table S1.

925

#### 926 **Time-lapse Microscopy**

927 Fluorescent time-lapse imaging was conducted using a DMI8 inverted epifluorescence microscope  
928 (Leica, Germany) with a 20X Plan Apo 0.8 NA objective and a Leica DFC9000 GT CMOS Camera  
929 using 2x2 binning. The microscope was enclosed in a cage incubator (Okolab Bold Line, custom  
930 for DMI8) held at 37°C, and samples were placed in a stage top chamber (Okolab H301-K-  
931 FRAME) also held at 37°C, 5% CO<sub>2</sub> (Praxair Cat. BI NICD506B-K), and with humidity control.  
932 CHO-K1 cells were seeded 24 hours prior to the start of movie acquisition on optically clear 96-

933 well  $\mu$ -Plates (Ibidi Cat. 89626). Border wells were filled with PBS (Thermo Fisher Scientific Cat.  
934 10010023) and plates were sealed with Breath-Easy gas-permeable membranes (Diversified  
935 Biotech Cat. BEM-1) to reduce evaporation and maintain humidity during image acquisition. Cells  
936 were imaged in alpha MEM media with no phenol red (Thermo Fisher, Cat. 41061029) with 10%  
937 Tet-Free FBS (Takara Cat. 631106; Lot #A17033 ), and 1% Penicillin/Streptomycin/Glutamine  
938 (Fisher Scientific Cat. 10378-016) to reduce background fluorescence. Images were acquired every  
939 20 minutes in three different fluorescent channels: YFP, RFP and CY5, corresponding to the  
940 mCitrine, mCherry and mIFP fluorophores, respectively. The light source was a Sola Light Engine,  
941 and a Lumencor control pod was used to attenuate the light to <1mW range. The FIM was set to  
942 10% and Lumencore was set to 5%. Exposure times were 150 ms, 200 ms and 100 ms for the CY5,  
943 RFP and YFP channels, respectively (an additional trigger cable between the light source and  
944 microscope was necessary to achieve precise exposure times). One to two time-lapse movies were  
945 analyzed for each cell line, where each movie consisted of cells in dozens of different wells, and  
946 in each well 3-5 non-overlapping sites were imaged. Cell culture media was changed every 24  
947 hours to replenish doxycycline and remove toxic reactive oxygen species which may have formed  
948 due to prolonged imaging. LasX software was used to control the microscope in the Mark and Find  
949 module to image up to 200 positions in total and AFC on demand mode adjusted focus for every  
950 cycle and position of imaging.

951

### 952 **Analysis of Time-lapse Movies**

953 Analysis of all time lapse movies was conducted in MATLAB R2016a (MathWorks) unless  
954 otherwise stated. Fluorescent imaging data were obtained by automated image segmentation and  
955 single-cell tracking using the MACKtrack package  
956 (<https://github.com/brookstaylorjr/MACKtrack>). Nuclei were segmented and tracked using H2B-  
957 mIFP signal or H2B-mCherry signal (on a case by case basis based on expression level) and single-  
958 cell intensities for integrated nuclear intensity of mCitrine, mCherry and mIFP channels were  
959 measured at each frame. Tracked single-cell output traces were then filtered in a semi-automated  
960 fashion to remove incomplete or mistracked cells which were defined as traces exhibiting  
961 numerous aberrant drops in fluorescence intensity inconsistent with cell divisions. Additionally,  
962 traces consisting of background silenced cells with low mCitrine expression prior to the 24 hour  
963 time point were omitted from analysis. In order to call transcriptional silencing events, the gradient  
964 of the cumulative intensity traces for mCherry and mCitrine were used. To generate cumulative

965 traces, mitotic events were first computationally identified based on periodic dilution of the stable  
966 H2B-fluorophore signal by approximately 50% upon cell division. Using these points as reference,  
967 raw cumulative traces for mCherry and mCitrine were generated by computationally re-adding the  
968 lost fluorescence due to cell division events and adding these values to all subsequent time points  
969 after a division event to “stitch together” intensity values across divisions (see Figure S2A). The  
970 raw stitched traces were smoothed to obtain smoothed stitched traces by applying: first a moving  
971 average filter (“smoothrows” function, Matlab) with a window size of 2 frames, then a  
972 “smoothingspline” (“fit” function, Matlab) with the smoothing parameter set to 1.0e-04, and finally  
973 a median filter (“medfilt1” function, Matlab) with a window-size of 3 frames. The gradient of these  
974 smoothed stitched traces were used to call silencing when it fell below a threshold. mCitrine or  
975 mCherry silencing was called in individual cells at the first frame where the gradient of the smooth  
976 cumulative trace fell below a threshold (25% for KRAB and 30% for HDAC4) of its initial value  
977 (taken to be the maximum gradient of the same trace between frames 50-70 prior to dox addition).  
978 Furthermore, cells must have stably remained below that threshold through at least one more cell  
979 division to be considered silenced. To account for the spike in mCherry signal following mCitrine  
980 silencing in certain cells (Figure S4B), the gradient threshold was called in these instances relative  
981 to a 10% drop from its absolute maxima which represented the spike directly prior to  
982 transcriptional silencing. Single-cell silencing delays were calculated by subtracting the frame  
983 number at which silencing was called in mCitrine from the corresponding silencing frame number  
984 of mCherry in the same cell and converting to hours.

985

### 986 **Statistical Analysis of Movie Delay Times**

987 Welch's unequal variances T-test was performed on GraphPad Prism 8.4 on the calculated time  
988 delays from movies to determine significance (p-values) between chromatin-regulator spreading  
989 rates between NS and 5kb reporters.

990

### 991 **Model for the Time Evolution of Fluorescence Distributions**

992 We have developed a model that describes the time dependent evolution of the fluorescence  
993 distributions of our two fluorescent reporters after the recruitment of CRs. This model has two  
994 components: a deterministic component describing the decay of fluorescence due to mRNA and  
995 protein degradation and dilution, and a probabilistic component taking into account that cells can  
996 stochastically transition between the active and silent states at different times. In the deterministic

997 component, we will derive equations that describe the fluorescence of cells in either the active or  
998 silent state, beginning with the simpler upstream *mCitrine* gene, followed by the downstream  
999 *mCherry* gene. The deterministic equations are then used in the probabilistic component to derive  
1000 a probability density function that describes flow cytometry data. By deriving this model and  
1001 fitting it to our data, we estimate the silencing parameters of our system such as the time delay  
1002 between reporter silencing and the magnitude of transcriptional interference.

### 1003 Deterministic Component with mRNA and Protein Degradation and Dilution

1004 In this component of the model, we derive deterministic equations for the fluorescence of cells in  
1005 the active and silent state. First, we will derive these equations for the simpler upstream *mCitrine*  
1006 gene. We begin at the level of transcription where  $m$  represents the concentration of reporter  
1007 mRNA. The recruitment of the CR begins at  $t = 0$  with the addition of doxycycline, but  
1008 transcriptional silencing of *mCitrine* does not occur until some time later,  $t_{S,C}$ . By assuming a  
1009 constant mRNA production rate,  $\alpha_m$ , and a constant coefficient of mRNA degradation and dilution,  
1010  $\beta_m$ , we can write a piecewise differential equation for mRNA concentration:

$$\frac{dm}{dt} = \begin{cases} \alpha_m - \beta_m m & , t \leq t_{S,C} \\ -\beta_m m & , t > t_{S,C} \end{cases} \quad (1)$$

1013  
1014 This differential equation describes transcription of the upstream *mCitrine* gene. We assume a  
1015 steady-state initial condition and continuity among the pieces to arrive at the following solution  
1016 for *mCitrine* mRNA as a function of time:

$$m(t) = \begin{cases} \frac{\alpha_m}{\beta_m} & , t \leq t_{S,C} \\ \frac{\alpha_m}{\beta_m} e^{-\beta_m(t-t_{S,C})} & , t > t_{S,C} \end{cases} \quad (2)$$

1019  
1020 Next, we move on to the level of translation, where mRNA is translated into protein. The protein  
1021 concentration is represented by  $p$ . Here we assume a constant coefficient of protein production,  $\alpha_p$   
1022 , and a constant coefficient of protein degradation and dilution,  $\beta_p$ . These assumptions allow us to  
1023 write the following general differential equation to represent translation:

1024

$$\frac{dp}{dt} = \alpha_p m - \beta_p p \quad (3)$$

Substituting our solution for  $m(t)$  into the equation above and combining  $\alpha_p$  and  $\alpha_m$  into a single integrated production parameter such that  $\alpha = \alpha_p \alpha_m$ , we arrive at the following piecewise differential equation for the concentration of the mCitrine protein over time:

$$\frac{dp}{dt} = \begin{cases} \frac{\alpha}{\beta_m} - \beta_p p & , t \leq t_{S,C} \\ \frac{\alpha}{\beta_m} e^{-\beta_m(t-t_{S,C})} - \beta_p p & , t > t_{S,C} \end{cases} \quad (4)$$

Again, we assume a steady-state initial condition and continuity among the pieces to arrive at the following solution for mCitrine concentration:

$$p(t) = \begin{cases} A & , t \leq t_{S,C} \\ B e^{-\beta_p(t-t_{S,C})} - C e^{-\beta_m(t-t_{S,C})} & , t > t_{S,C} \end{cases} \quad (5)$$

Where

$$A = \frac{\alpha}{\beta_p \beta_m} \quad B = \frac{\alpha}{\beta_p \beta_m - \beta_p^2} \quad C = \frac{\alpha}{\beta_m^2 - \beta_p \beta_m} \quad (6)$$

Now that we have derived equations for the concentration of protein over time, we need to convert from concentration to fluorescence, represented by  $x$  in our model. We assume that fluorescence increases proportionally to concentration after the addition of some background fluorescence  $x_B$ . The proportionality constant is absorbed into the production parameter,  $\alpha$ . Therefore, fluorescence can simply be expressed as protein concentration with the addition of the background fluorescence in Arbitrary Fluorescence Units (AFU):

$$x(t) = x_B + p(t) \quad (7)$$

Using this relationship and the solution to  $p(t)$ , we define two separate equations for mCitrine fluorescence, one for the active state where  $t \leq t_{S,C}$  and one for the silent state where  $t > t_{S,C}$ :



1053

$$1054 \quad x_A(t) = x_B + A \quad (8)$$

1055

$$1056 \quad x_S(t, t_{S,C}) = x_B + B e^{-\beta_p(t-t_{S,C})} - C e^{-\beta_m(t-t_{S,C})} \quad (9)$$

1057

1058 These two equations describe the fluorescence for the upstream *mCitrine* gene, but they are too  
 1059 simple to describe silencing at the downstream *mCherry* gene, as we often observe an increase in  
 1060 mCherry after the recruitment of the CR. We hypothesize that this upwards spike in mCherry  
 1061 production is due to the loss of transcriptional interference upon silencing of the upstream *mCitrine*  
 1062 gene. Therefore, we modified the differential equation for mRNA with the addition of a new term,  
 1063  $\gamma$ , which represents the factor by which mRNA production is reduced by transcriptional  
 1064 interference. This factor is removed after the average silencing time of the *mCitrine* gene,  $t_{S,C}$ ,  
 1065 causing a delayed spike in the mRNA concentration of *mCherry* before it silences and begins to  
 1066 degrade at its own  $t_{S,M}$ :

1067

$$\frac{dm}{dt} = \begin{cases} \frac{\alpha_m}{\gamma} - \beta_m m & , t \leq t_{S,C} \\ \alpha_m - \beta_m m & , t_{S,C} < t \leq t_{S,M} \\ -\beta_m m & , t > t_{S,M} \end{cases} \quad (10)$$

1068

1069

1070 To solve this differential equation, we again assume a steady-state initial condition and continuity  
 1071 among the pieces. The solution for *mCherry* mRNA over time is:

1072

$$m(t) = \begin{cases} \frac{\alpha_m}{\beta_m \gamma} & , t \leq t_{S,C} \\ \frac{\alpha_m}{\beta_m} [1 - \Gamma e^{-\beta_m(t-t_{S,C})}] & , t_{S,C} < t \leq t_{S,M} \\ \frac{\alpha_m}{\beta_m} [1 - \Gamma e^{-\beta_m(t_{S,M}-t_{S,C})}] e^{-\beta_m(t-t_{S,M})} & , t > t_{S,M} \end{cases} \quad (11)$$

1073

1074

1075 Where

1076

$$1077 \quad \Gamma = 1 - \frac{1}{\gamma} \quad (12)$$

1078

1079 Substituting this solution for  $m(t)$  into the general translation equation and again combining  $\alpha$ 's  
 1080 into an integrated production parameter  $\alpha$ , we arrive at a piecewise differential equation for the  
 1081 concentration of mCherry over time:

1082

$$\frac{dp}{dt} = \begin{cases} \frac{\alpha}{\beta_m \gamma} - \beta_p p & , t \leq t_{S,C} \\ \frac{\alpha}{\beta_m} [1 - \Gamma e^{-\beta_m(t-t_{S,C})}] - \beta_p p & , t_{S,C} < t \leq t_{S,M} \\ \frac{\alpha}{\beta_m} [1 - \Gamma e^{-\beta_m(t_{S,M}-t_{S,C})}] e^{-\beta_m(t-t_{S,M})} - \beta_p p & , t > t_{S,M} \end{cases} \quad (13)$$

1083

1084

1085 Again, we assume a steady-state initial condition and continuity among the pieces to arrive at the  
 1086 following solution for mCherry concentration over time:

1087

$$p(t) = \begin{cases} \frac{A}{\gamma} & , t \leq t_{S,C} \\ A - B\Gamma e^{-\beta_p(t-t_{S,C})} + C\Gamma e^{-\beta_m(t-t_{S,C})} & , t_{S,C} < t \leq t_{S,M} \\ [D + CE] e^{-\beta_p(t-t_{S,M})} - CE e^{-\beta_m(t-t_{S,M})} & , t > t_{S,M} \end{cases} \quad (14)$$

1088

1089

1090 Where

1091

$$D = A - B\Gamma e^{-\beta_p(t_{S,M}-t_{S,C})} + C\Gamma e^{-\beta_m(t_{S,M}-t_{S,C})} \quad (15)$$

1092

1093

$$E = 1 - \Gamma e^{-\beta_m(t_{S,M}-t_{S,C})} \quad (16)$$

1094

1095

1096 While the previous equation for  $p(t)$  assumes the more likely scenario that the upstream *mCitrine*  
 1097 gene silences before the downstream *mCherry* gene ( $t_{S,M} > t_{S,C}$ ), we must also consider that  
 1098 *mCherry* may silence before *mCitrine* ( $t_{S,M} \leq t_{S,C}$ ). In this scenario, there is no spike of mCherry  
 1099 expression because the *mCherry* promoter silences without the loss of transcriptional interference  
 1100 concomitant with *mCitrine* silencing. Therefore, the following solution for mCherry concentration  
 1101 over time when mCherry silences first is the same as mCitrine, only divided by  $\gamma$ :

1102

$$p(t) = \begin{cases} \frac{A}{\gamma} & , t \leq t_{S,M} \\ \frac{B}{\gamma} e^{-\beta_p(t-t_{S,M})} - \frac{C}{\gamma} e^{-\beta_m(t-t_{S,M})} & , t > t_{S,M} \end{cases} \quad (17)$$

1103

1104

1105 Now that we have defined two equations of mCherry concentration, we again combine these  
 1106 equations with the fluorescence equation and split them such that there is one equation for the  
 1107 active state where  $t \leq t_{S,M}$  and one equation for the silent state where  $t > t_{S,M}$ . The active state  
 1108 fluorescence combines the first two parts of equation 14 with the first part of equation 17 while  
 1109 the silent state fluorescence combines the third part of equation 14 with the second part of equation  
 1110 17. These combinations reflect that in either the active or silent state, either reporter can silence  
 1111 first. The fluorescence equations for mCherry are:

$$x_A(t) = \begin{cases} x_B + \frac{A}{\gamma} & , t \leq t_{S,C} \\ x_b + A - B\Gamma e^{-\beta_p(t-t_{S,C})} + C\Gamma e^{-\beta_m(t-t_{S,C})} & , t > t_{S,C} \end{cases} \quad (18)$$

$$x_S(t, t_{S,M}) = \begin{cases} x_B + \frac{B}{\gamma} e^{-\beta_p(t-t_{S,M})} - \frac{C}{\gamma} e^{-\beta_m(t-t_{S,M})} & , t_{S,M} \leq t_{S,C} \\ x_b + [D + CE] e^{-\beta_p(t-t_{S,M})} - CE e^{-\beta_m(t-t_{S,M})} & , t_{S,M} > t_{S,C} \end{cases} \quad (19)$$

1112  
 1113  
 1114  
 1115  
 1116  
 1117 These two equations describe the downstream mCherry fluorescence at any given point in time  
 1118 and with any given  $t_{S,C}$  and  $t_{S,M}$ . They will be useful in the next section of the model. The constant  
 1119 parameters of the model thus far are as follows:

- 1120
- 1121 ●  $\alpha$  - the integrated fluorescence production parameter in AFU/day<sup>2</sup>
- 1122 ●  $\beta_p$  - the protein degradation and dilution coefficient in days<sup>-1</sup>
- 1123 ●  $\beta_m$  - the mRNA degradation and dilution coefficient in days<sup>-1</sup>
- 1124 ●  $x_B$  - the background fluorescence in AFU
- 1125 ●  $\gamma$  - the interference factor (only applicable for mCherry)

## 1126 Probabilistic Component with Stochastic Transcriptional Silencing

1127 In the probabilistic component of the model, we include a stochastic transition between active and  
 1128 silent states in the derivation of a probability density function of fluorescence  $x$  at time  $t$ ,  $f(x, t)$ .  
 1129 The distribution evolves over time and describes the flow cytometry data that we collect over the  
 1130 course of our silencing experiments. This probability density function of fluorescence is a  
 1131 weighted sum of three independent probability density functions, one for each of three possible  
 1132 cell states: background silent cells,  $f_B(x)$ ; active cells,  $f_A(x, t)$ ; and silent cells,  $f_S(x, t)$ . The time

1133 dependence in active and silent cells reflects the time dependence in the deterministic equations  
1134 describing fluorescence in the active and silent states. Furthermore, because we have observed that  
1135 the transition from the active to the silent state is a stochastic process with variability between  
1136 cells,<sup>8</sup> we incorporate a time dependence into the weights of active and silent cells,  $P_A(t)$  and  
1137  $P_S(t)$  respectively. The probability density function can hence be written:

$$1138 \quad f(x, t) = P_B f_B(x) + P_A(t) f_A(x, t) + P_S(t) f_S(x, t) \quad (20)$$

1139  
1140  
1141 To consider all cells and for  $f(x, t)$  to meet the definition of a probability density function, the  
1142 weights of each state, represented by  $P$ 's, must sum to 1. For simplicity, we assume that the fraction  
1143 of background silent cells,  $P_B$ , does not significantly change over the silencing time course.  
1144 Therefore,  $P_B$  does not have a time dependence in the following relationship:

$$1145 \quad P_B + P_A(t) + P_S(t) = 1 \quad (21)$$

1146  
1147  
1148 To determine the fraction of active cells and silent cells at any point in time, we consider that a  
1149 cell transitions from an active state to a silent state after a time of  $t_S$ . We add stochasticity to this  
1150 transition by allowing cells to transition at different times and defining random variable  $T_S$ . We  
1151 choose a gamma distribution for  $T_S$  as this distribution is defined to be strictly greater than zero  
1152 and can assume various shapes between an exponential distribution with  $k = 1$  and a normal  
1153 distribution as  $k$  approaches infinity. In the shape-rate parameterization of the gamma distribution,  
1154 the rate, typically represented as  $\theta$ , can be expressed by dividing the mean,  $\tau_S$ , by the shape  $k$ .  
1155 Therefore, we attain the following definition and probability density function for  $T_S$ :

$$1156 \quad T_S \sim \Gamma(k, \frac{\tau_S}{k}) \quad (22)$$

$$1157 \quad g(t_S) = \frac{k^k t_S^{k-1}}{\tau_S^k \Gamma(k)} e^{-\frac{kt_S}{\tau_S}} \quad (23)$$

1158  
1159  
1160  
1161 Using this definition, we will attain solutions for  $P_A(t)$  and  $P_S(t)$  by first integrating over  $T_S$ 's  
1162 probability density function from 0 to  $t$  to yield the following cumulative density function:

1163

$$G(t) = \int_0^t g(t_S) dt_S \quad (24)$$

1164

1165

1166 This cumulative density function represents the fraction of active cells that have transitioned into  
1167 the silent state until  $t$  and must be multiplied by  $(1 - P_B)$  to yield the overall weight of silent cells:

1168

$$P_S(t) = (1 - P_B)G(t) \quad (25)$$

1170

1171 To get the weight of active cells, we simply subtract the cumulative density function from 1 to find  
1172 the fraction of active cells that have not silenced until  $t$  before multiplication by  $(1 - P_B)$ :

1173

$$P_A(t) = (1 - P_B)(1 - G(t)) \quad (26)$$

1174

1175  
1176 With analytical expressions for each weight, we now consider each independent probability  
1177 density function of fluorescence for each of the three cell states. First, the probability density  
1178 function for the fluorescence of background silent cells does not have a time dependence and is  
1179 log-normal with a median of the background fluorescence,  $x_B$ , and a shape parameter, or log-space  
1180 standard deviation,  $\sigma$ :

1181

$$f_B(x) = \frac{1}{x\sigma\sqrt{2\pi}} e^{-\frac{\ln(\frac{x}{x_B})^2}{2\sigma^2}} \quad (27)$$

1182

1183

1184 Next, the probability density function for the fluorescence of active cells is also log-normal, but  
1185 the median of this distribution is given by  $x_A(t)$  derived in the previous section. For simplicity, we  
1186 assume that the shape parameter of this distribution,  $\sigma$ , is the same as the background distribution:

1187

$$f_A(x, t) = \frac{1}{x\sigma\sqrt{2\pi}} e^{-\frac{\ln(\frac{x}{x_A(t)})^2}{2\sigma^2}} \quad (28)$$

1188

1189

1190 Finally, the probability density function for the fluorescence of silent cells is a convolution of  $T_S$   
1191 's gamma distribution for silencing and a log-normal distribution with a median of  $x_S(t, t_S)$ . The

1192 convolution occurs over  $t_S$  from time 0 to  $t$ . This step can be thought of as a weighted sum of log-  
1193 normal distributions with different medians based on when silencing occurred. Because the weights  
1194 only sum to the probability of silencing up to  $t$ , the integral must be normalized by division by  $G(t)$   
1195 . This normalization ensures that  $f_S(x, t)$  integrates to one:

$$1196 \quad f_S(x, t) = \frac{1}{G(t)} \frac{1}{x\sigma\sqrt{2\pi}} \int_0^t g(t_S) e^{-\frac{\ln(\frac{x}{x_S(t, t_S)})^2}{2\sigma^2}} dt_S \quad (29)$$

1198  
1199 Again, we used the same shape parameter,  $\sigma$ , so that when the fluorescence decays to background  
1200 levels, the distribution for fluorescence of background silent cells matches the distribution for  
1201 silent cells:

$$1202 \quad \lim_{t \rightarrow \infty} f_S(x, t) = f_B(x) \quad (30)$$

1204  
1205 We have now defined the weights and probability density functions for each of the three possible  
1206 states in terms of some new parameters and the equations derived in the deterministic component,  
1207 which concludes the probabilistic component of the derivation. The additional constant parameters  
1208 of the model are:

- 1209
- 1210 ●  $P_B$  - the fraction of background silent cells
  - 1211 ●  $k$  - the shape parameter of  $T_S$ 's gamma distribution
  - 1212 ●  $\tau_S$  - the mean silencing time from of  $T_S$ 's gamma distribution in days
  - 1213 ●  $\sigma$  - the shape parameter for all log-normal fluorescence distributions

1214

### 1215 Fitting Method

1216 Fitting our probabilistic model to the flow cytometry data allows us to estimate the relevant  
1217 silencing parameters. Of particular interest are the interference parameter,  $\gamma$ , and the mean  
1218 silencing times for *mCitrine* and *mCherry*,  $\mu_{S,C}$  and  $\mu_{S,M}$ , as well as the difference between the  
1219 two, or  $\Delta\mu_S$ . Our model fitting was conducted in Python 3 Jupyter notebooks.

1220



1221 First, we defined functions  $F_o(t, \text{params}^*)$  and  $F_s(t, t_l, \text{params}^*)$  to calculate  $x_A(t)$  and  $x_S(t, t_S)$   
1222 from the deterministic portion of the derivation respectively. Within these functions, we set the  
1223 mRNA half-life ( $\beta_m$ ) to four hours as was previously determined experimentally <sup>8</sup>. Then we  
1224 defined  $f(x, t)$  to calculate the probability distribution derived in the probabilistic portion of the  
1225 derivation. Although the derivation describes the distribution on a linear scale,  $f(x, t)$  calculates the  
1226 distribution on a  $\log_{10}$  scale as this scale is more commonly used to visualize and work with flow  
1227 cytometry data.

1228  
1229 With functions defined to calculate the model solution given a set of parameters, we next defined  
1230 an error function to calculate error between the data and the model. To calculate this error, the  
1231 fluorescence values are binned into 100 equally spaced bins for each timepoint in the data. The  
1232 probability densities of each bin are calculated. Then, we evaluate the model with the given  
1233 parameters at the midpoint of each bin. The error is calculated by subtracting the bin densities from  
1234 the solution to the model's probability density function. The error arrays from each timepoint are  
1235 appended to generate a single array of errors for the whole time course.

1236  
1237 The mCitrine and mCherry reporters were each fit separately and had differences in the parameters  
1238 used. Therefore, we used the general error function described above to define two separate error  
1239 functions for mCitrine and mCherry. Since we never saw a spike in mCitrine expression, the  
1240 interference parameter,  $\gamma$ , was intentionally set to one and the spike delay,  $t_{S,C}$  in the deterministic  
1241 derivation for mCherry, was set to zero. Fixing these parameters eliminates the reporter spike and  
1242 allows us to use the same set of equations to describe both mCitrine and mCherry. Additionally,  
1243 we set the shape parameter of  $T_S$ 's gamma distribution for mCitrine to one. This constrains the  
1244 gamma distribution to an exponential distribution, which is more suitable for mCitrine because  
1245 this reporter silences quickly and reliably upon induction (Figure 2, time-lapse movie results).

1246  
1247 The mCherry fit was conducted after the mCitrine fit as some of the parameters are carried from  
1248 mCitrine to mCherry. One of these parameters is the protein dilution  $\beta_p$ , which can be more reliably  
1249 calculated in the mCitrine fit due to higher dynamic range and more uniform silencing. Since both  
1250 the mCitrine and mCherry reporters are fused to H2B, they are stable and do not degrade  
1251 significantly over the course of the experiment. Therefore,  $\beta_p$  is governed by dilution due to cell

1252 division and is the same for both mCitrine and mCherry. In addition,  $\tau_{S,C}$  was calculated in the  
1253 mCitrine fit and then used as  $t_{S,C}$  in the mCherry deterministic equations.

1254

1255 There is one additional consideration for the mCherry fits. Due to fast mCherry silencing by  
1256 KRAB, it was difficult estimate both the interference factor,  $\gamma$ , and the mean silencing delay,  $\mu_{S,M}$   
1257 . Therefore, we used the  $\gamma$ 's estimated from the slower HDAC4 silencing time courses for each  
1258 reporter when estimating the parameters in the KRAB silencing data. We believe this is acceptable  
1259 because transcriptional interference is a property of the reporter and not the CR. The exception is  
1260 that for the K562 insulator lines we did not fit the model to the HDAC4 data because we do not  
1261 see complete silencing of mCherry. For these HDAC4 lines we estimated  $\gamma$  by taking the ratio of  
1262 the maximum mode of the fluorescence in the time course to the mode on day zero and used this  
1263 estimated  $\gamma$  for the KRAB fits.

1264

1265 One final adjustment to the model was made to fit non-saturating dox concentrations (100ng/mL  
1266 and 200ng/mL). When dox concentration was low, we did not observe silencing of mCitrine in all  
1267 cells as was the case for 1000ng/ml, and accordingly did not observe subsequent spreading of  
1268 silencing to mCherry in those cells. To account for only a fraction of cells being silenced, an  
1269 additional parameter was added to the model to represent cells that are always active,  $P_{aa}$ . These  
1270 cells do not silence, and their fluorescence distribution is fixed at active-state levels. Consequently,  
1271 only  $1 - P_{aa}$  are involved in silencing and are subject to the components described by equation  
1272 (21).

1273

1274 To estimate the unconstrained parameters for each reporter, we fit the model to the data using a  
1275 least-squares approach, `scipy.optimize.least_squares()`. This function solves for the parameters  
1276 that minimize the sum of the squares of the error array that we defined. Initial guesses for each  
1277 parameter were reasonably estimated by manual inspection of the data where possible. Bounds for  
1278 each parameter were set generously as to avoid bounding of the solution where possible. The fits  
1279 were performed independently for each replicate or single clone and took several hours for each  
1280 cell line. However, the resulting fits were satisfactory by visual inspection, and the parameters  
1281 were in accordance with those found in time course movie analysis.

1282

1283 The 90% confidence interval (CI) for the parameters extracted from fitting daily flow cytometry  
1284 data to the model, was estimated using a t-distribution with t-score 2.92 and sample standard  
1285 deviation from all replicates.

1286

## 1287 **Supplementary Text**

1288

### 1289 Transcriptional Interference

1290 We noticed an increase in mCherry expression after 5 days of HDAC4 recruitment in K562 with  
1291 the NS reporter (Figure 1E). We wondered if this spike in mCherry fluorescence was due to ceasing  
1292 of transcriptional interference on the pRSV-mCherry from the upstream pEF promoter.  
1293 Transcriptional interference can occur through promoter occlusion as has been previously  
1294 measured<sup>29,54,55</sup>. We hypothesized that if transcription termination failed at the mCitrine polyA,  
1295 Pol II would run on into the RSV promoter and hinder transcription initiation of the mCherry gene  
1296 (Figure S2A). Upon transcriptional silencing of the upstream pEF promoter, regular transcription  
1297 initiation at pRSV can resume, leading to the observed temporary increase in mCherry expression  
1298 prior to chromatin mediated silencing of pRSV-mCherry (Fig S2B). To test if any transcripts span  
1299 from the mCitrine gene body across pRSV into the mCherry gene body, we performed PCR on  
1300 cDNA from K562 cells after different durations of HDAC4 recruitment. This revealed that indeed,  
1301 in cells where pEF has not yet been silenced by HDAC4, there is transcriptional run-on from pEF  
1302 over pRSV, and that run-on does not occur in cells where mCherry is increased (Fig S2B). This  
1303 suggests that the observed increase in mCherry production is due to pEF silencing and  
1304 transcriptional interference no longer occurring. We do not see this effect with KRAB because  
1305 silencing spreads more quickly than for HDAC4, and does not leave sufficient time for  
1306 transcription to initiate at pRSV before both genes are silenced.

1307

1308 To experimentally measure the dynamics of transcriptional interference, we performed RT-qPCR  
1309 against different elements of the reporter after 0, 1 and 5 days of HDAC4 recruitment in CHO-K1  
1310 cells with the 5kb reporter (Figure S2C-D). Our data confirmed transcription of the 5kb lambda  
1311 region, and revealed that mCitrine and lambda mRNA levels both decreased after one day of  
1312 HDAC4 recruitment. This further suggests that transcription runs on from mCitrine through the  
1313 5kb lambda into mCherry, preventing transcription initiation at pRSV. Interestingly, mCherry

1314 mRNA abundance did not change between 0 and 1 day of HDAC4 recruitment, even though the  
1315 mCherry protein level significantly increased after 1 day of HDAC4 recruitment. Since it is not  
1316 possible to distinguish the initiation point of transcripts by RT-qPCR, the measured mCherry  
1317 mRNA abundance comes from a combination of transcripts initiated at pRSV and transcripts  
1318 initiated at pEF that run through mCherry. It should only be possible to translate mCherry from  
1319 transcripts initiated at pRSV since the mCherry in the run-on transcript would not be in the correct  
1320 reading frame. Therefore, the observed increase in mCherry protein abundance may result from an  
1321 increase in the fraction of translatable mCherry mRNA as pEF is silenced. Further experiments  
1322 would be needed to confirm this.

1323

1324 We noticed that in the absence of dox pRSV-mCherry expression for the SH reporter is much  
1325 higher than for the 5kb lambda reporter in CHO-K1 (Figure S12). We also do not observe an  
1326 increase in mCherry expression upon HDAC4 recruitment in CHO-K1 cells with insulators (Figure  
1327 S2E), unlike in the 5kb lambda reporter (Figure S2D). We performed PCR on cDNA to test if any  
1328 transcripts span from the mCitrine gene body across the cHS4 insulator and pRSV into the  
1329 mCherry gene body at different durations of HDAC4 recruitment in CHO-K1. The run-on  
1330 transcript was not present at day 0 or after 1 or 5 days of HDAC4 recruitment in the SH insulator  
1331 by PCR (Figure S2F). This suggests that the single cHS4 insulator, and possibly the cHS4 core  
1332 sequence, can terminate transcription. This effect is in agreement with previous studies which have  
1333 shown that insulator sequences can enhance gene expression and reduce promoter interference<sup>40</sup>.

1334

### 1335 Background Silencing

1336 The extent to which background silencing is mitigated is influenced by the insulator configuration,  
1337 cell type, and the CR that is over-expressed. By monitoring mCitrine and mCherry expression over  
1338 time without CR recruitment, we are able to quantify the fraction of cells that spontaneously silence  
1339 either mCitrine or mCherry (Figure S11). We calculated the rate of background silencing over time  
1340 for each reporter by performing a least squares regression to the fraction of background silenced  
1341 cells for each clone or replicate (Figure S11). For both KRAB and HDAC4 in CHO-K1 cells, all  
1342 the insulator configurations reduced background silencing of the mCitrine and mCherry genes in  
1343 comparison to the NS and 5kb reporters. By contrast, the insulators increase the rate of background  
1344 silencing in some configurations in K562 cells, and this effect is dependent on the CR present.  
1345 With KRAB, all the insulator configurations lead to slightly higher background silencing than the

1346 NS and 5kb reporters, and the level of silencing is similar for mCitrine and mCherry. With  
1347 HDAC4, the levels of background silencing differ between mCitrine and mCherry, and the SH and  
1348 DH insulators have strikingly high levels of mCherry background silencing. In only switching  
1349 either the CR or cell type in a controlled system, we show that insulators have vastly different  
1350 effects on neighboring genes.

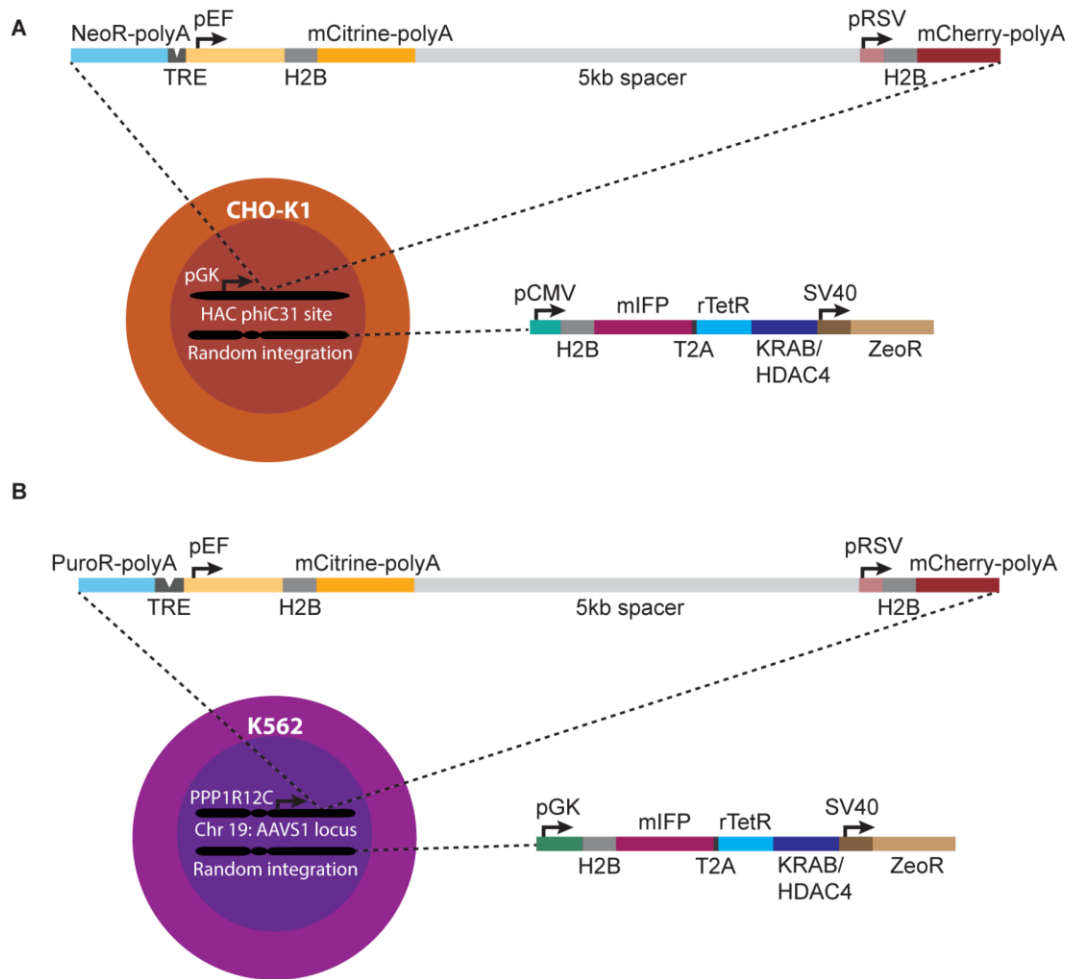

1351

1352 **Figure 1 - figure supplement 1. Reporter constructs used in different cell lines for analyzing**  
1353 **spreading of transcriptional changes.**

1354 (A) Dual mCitrine-mCherry reporter (top) is integrated in CHO-K1 cells in the MI-HAC<sup>56</sup> at the  
1355 phiC31 integrase site. Upon integration, the neomycin resistance gene (NeoR) starts being  
1356 expressed from the pGK promoter in the MI-HAC.

1357 (B) Dual mCitrine-mCherry reporter is integrated in K562 cells by TALENS at the AAVS1  
1358 locus. Upon integration, the puromycin resistance gene (PuroR) is driven by the promoter for the  
1359 PPP1R12C gene<sup>28</sup>.

1360 Both mCitrine and mCherry genes have SV40 polyA tails which should aid in transcriptional  
1361 termination of each gene. NeoR in CHO-K1 and PuroR in K562 both have a BGH polyA. The  
1362 TRE in CHO-K1 has 5 TetO binding sites, while the TRE in K562 has 9 TetO binding sites. In  
1363 both cell types, each fluorescent protein is fused to H2B which stabilizes the fluorophore and  
1364 localizes it to the nucleus, allowing better tracking of single cells in time-lapse microscopy.  
1365 Chromatin regulators fusions of rTetR to either KRAB or HDAC4 are expressed via random  
1366 integration by piggyBac transposase, the approximate expression of which can also be monitored  
1367 by fluorescence of the H2B-mIFP fusion. The size of each element is drawn approximately to  
1368 scale.



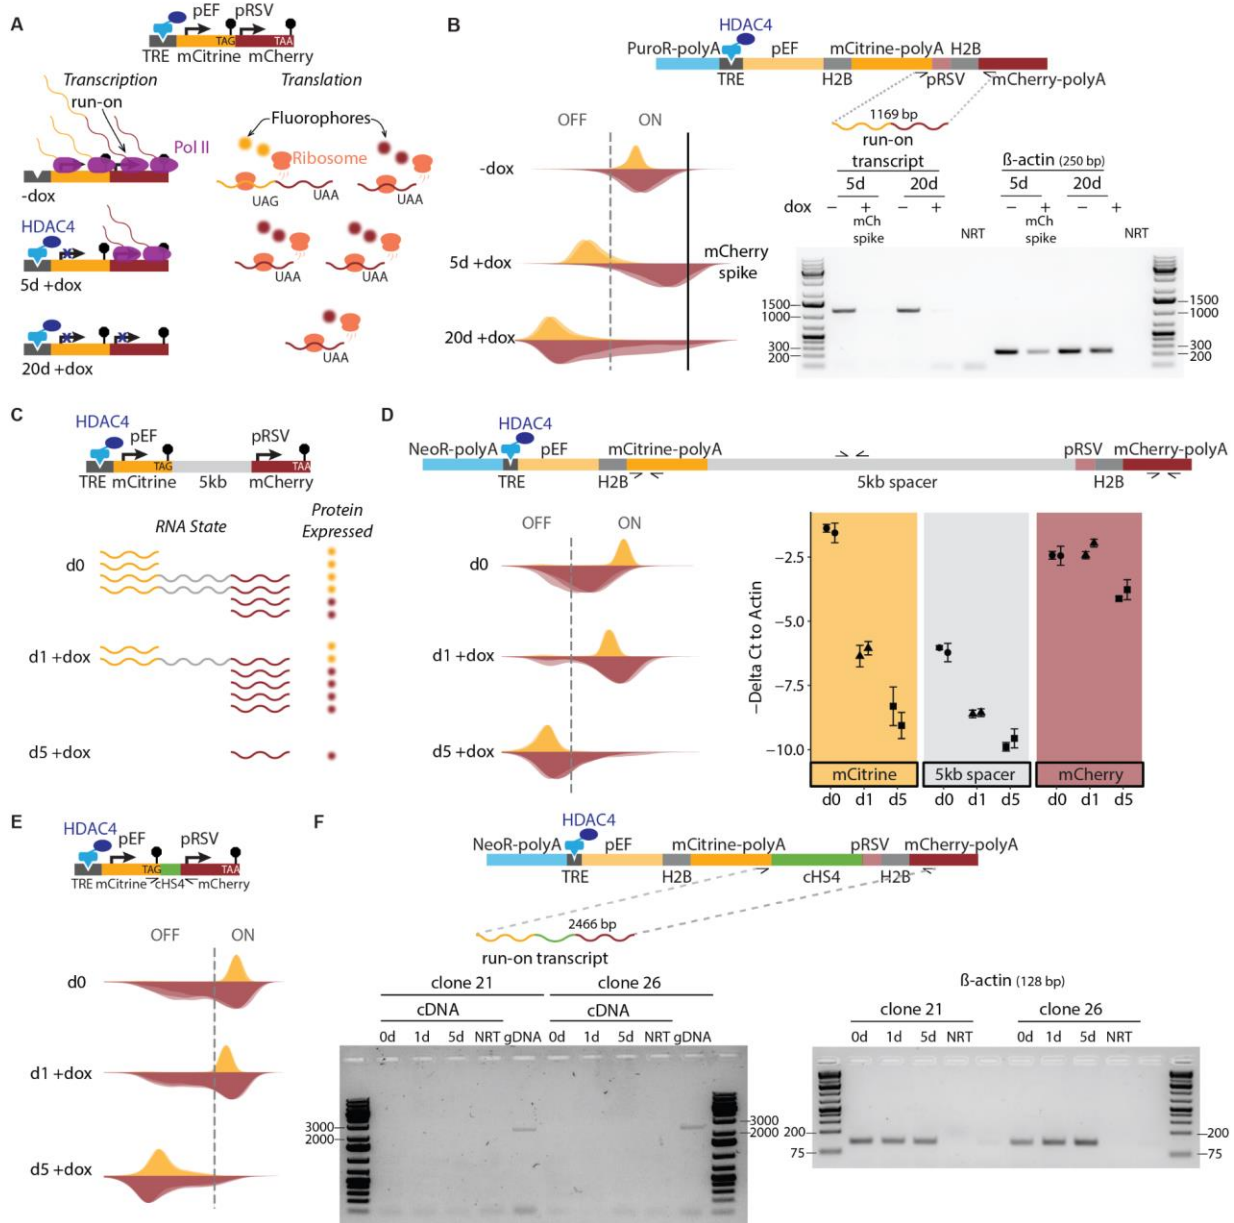

1369

1370 **Figure 1-figure supplement 2. Transcriptional run-on from pEF over pRSV.**

1371 (A) Schematic representation of transcription (left) and translation (right) of NS reporter (top) in

1372 K562 during HDAC4 recruitment. Transcriptional run-on from pEF into pRSV occurs despite

1373 the presence of polyA (-dox row, left). Note that mCitrine and mCherry genes both have stop

1374 codons at their 3' end (black stop signs) and neither gene has an IRES at the 5' end, such that

1375 mCherry can only be translated from transcripts initiated at pRSV (-dox row, right). When pEF

1376 is silenced by HDAC4 for 5 days (5d +dox row, left), run-on no longer occurs and transcription

1377 initiation at the pRSV increases, resulting in more mCherry protein (5d +dox row, right). After

1378 20 days of HDAC4 recruitment (20d +dox row), both genes are silenced.

1379 (B) (top) Schematic of the NS spreading reporter (as described in Figure S1), showing primers

1380 for amplifying run-on transcript. (Left) Fluorescence distribution of mCitrine and mCherry

1381 across timepoints of HDAC4 recruitment at the NS reporter in K562, matching schematics in (A)

1382 for each row. Flow cytometry data from 3 replicates of recruitment are shown as overlaid semi-  
1383 transparent distributions. Vertical dashed line shows the threshold for ON/OFF populations.  
1384 After 5 days of recruitment (5d +dox) cells were sorted for mCherry expression above those in  
1385 the -dox sample (mCherry spike, to the right of black line). (Right) Agarose gel showing PCR  
1386 products that use as template cDNA reverse transcribed from mRNA extracted from either: cells  
1387 with no recruitment (-dox), cells sorted on high mCherry (mCherry spike on the left), or cells  
1388 with 20 days of recruitment (20d +dox). PCR primers amplify either a region spanning across the  
1389 mCitrine and mCherry genes (labelled 1169 bp run-on transcript at the top) or beta-actin as a  
1390 control for cDNA input.

1391 (C) Schematic representation of mRNA and fluorescent proteins levels of 5kb reporter in CHO-  
1392 K1 during HDAC4 recruitment. Transcription termination fails in mCitrine polyA causing Pol II  
1393 to run-on into 5kb lambda spacer and mCherry gene without dox (d0), reducing initiation of  
1394 transcription of mCherry until pEF is silenced at day 1 of dox (d1), allowing pRSV to increase  
1395 expression of mCherry before being silenced by the chromatin regulator at day 5 of dox (d5).

1396 (D) (Top) Schematic of the 5kb spreading reporter (as described in Figure S1), showing the  
1397 positions of the primers used for qPCR. (Left) Fluorescence distributions of reporter genes across  
1398 timepoints of HDAC4 recruitment to 5kb reporter in CHO-K1. Flow cytometry data from  
1399 independent clonal cell lines are shown as overlaid semi-transparent distributions. Vertical  
1400 dashed lines show the threshold for ON/OFF populations. (Right) qPCR was performed on  
1401 cDNA reverse transcribed from mRNA on regions of mCitrine, 5kb lambda spacer, and mCherry  
1402 after 0, 1, and 5 days of HDAC4 recruitment. Delta Cts with respect to Beta-actin are shown for  
1403 two clones used as biological replicates. Error bars are one standard deviation of three technical  
1404 replicates within each clone. Beta-actin was used as a control for normalization.

1405 (E) (Top) Schematic of HDAC4 recruitment at a construct where the reporter genes are separated  
1406 by a full cHS4 insulator (SH). (Bottom) Fluorescence distributions of reporter genes across  
1407 timepoints of HDAC4 recruitment to the SH construct in CHO-K1. Flow cytometry data from 3  
1408 replicates of recruitment are shown as overlaid semi-transparent distributions. Vertical dashed  
1409 line shows the threshold for ON/OFF populations.

1410 (F) (Top) Schematic of the SH spreading reporter, showing PCR primers that detect the mRNA  
1411 produced if run-on occurs. (Bottom, left) Agarose gel showing PCR products for a region  
1412 spanning across the mCitrine and mCherry genes including the cHS4 insulator was performed on  
1413 cDNA from CHO-K1 HDAC4 SH cells in two clones at 0, 1 and 5 days of HDAC4 recruitment.  
1414 Genomic DNA (gDNA) was used as a control for primer validation. (Bottom, right) Beta-actin  
1415 was amplified as a control for cDNA input.

1416

1417 **Figure 1 - figure supplement 2 – source data.** Original gel images from RT-PCR.

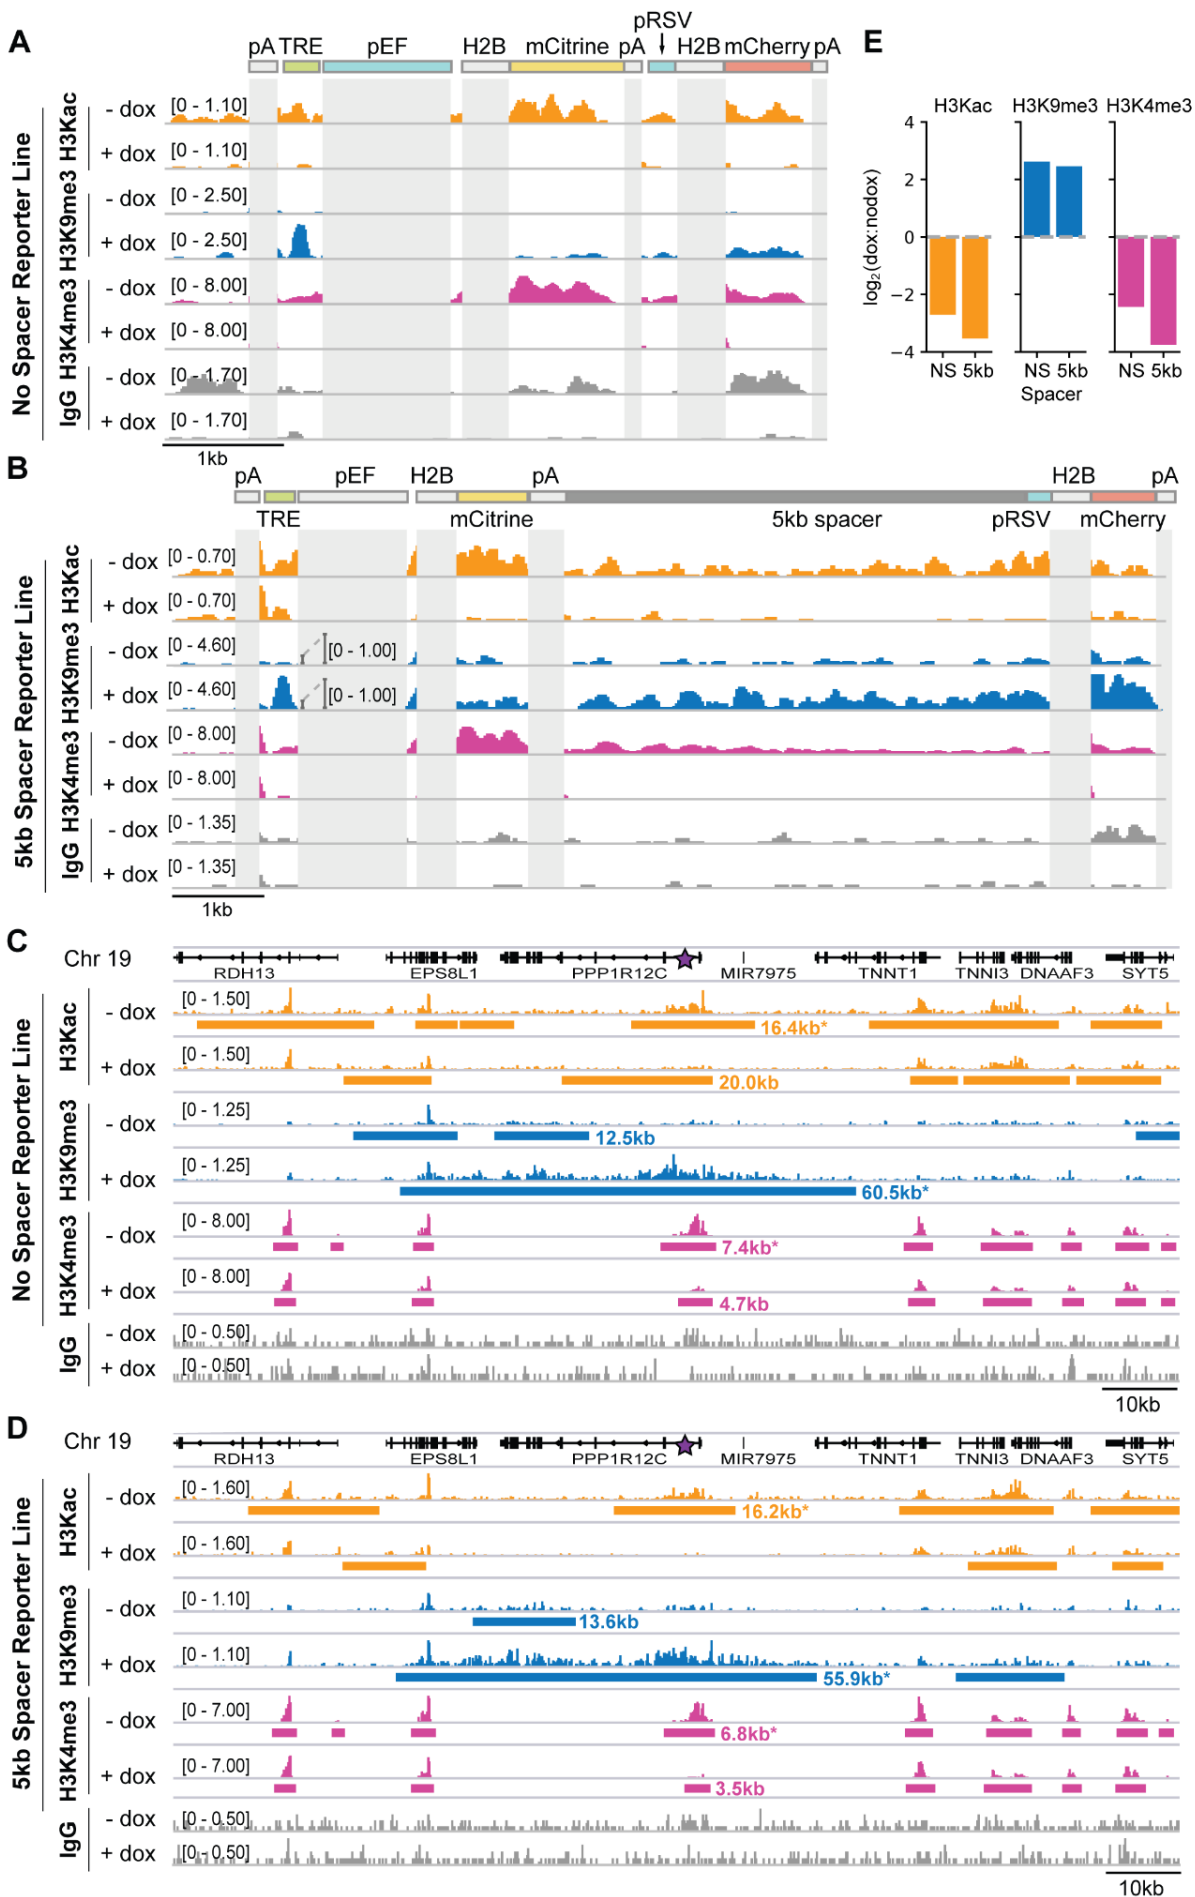

1419 **Figure 2 - figure supplement 1. Changes in chromatin modifications at the two-gene**  
1420 **reporter and surrounding AAVS1 locus after recruitment of KRAB for five days in K562**  
1421 **cells.**  
1422 **(A-B)** Genome browser tracks of histone 3 acetyl-lysine (H3Kac), histone 3 lysine 9  
1423 trimethylation (H3K9me3), histone 3 lysine 4 trimethylation (H3K4me3), and IgG, as measured  
1424 by CUT&RUN in K562 cells with and without dox-mediated recruitment of rTetR-KRAB to the  
1425 **(A)** no-spacer reporter and **(B)** 5kb reporter. Numbers in square brackets indicate y-axis (CPM)  
1426 scaling. Reporter elements that also appear in the human genome or that are duplicated within  
1427 the reporter (i.e. pEF, H2B, and polyA [pA]) are masked in light gray.  
1428 **(C-D)** Genome browser tracks of H3Kac, H3K9me3, H3K4me3, and IgG ChromaBlocks-  
1429 identified domains with and without recruitment of rTetR-KRAB, looking at the surrounding  
1430 locus where the **(C)** NS reporter or **(D)** 5kb reporter is integrated in cells (purple star within first  
1431 intron of PPP1R12C, which is oriented in the reverse direction). Note that this snapshot does not  
1432 include an in situ representation of the reporter, which instead has been appended to the  
1433 reference genome as a separate chromosome in order to preserve gene annotations. Domains for  
1434 H3K9me3, H3Kac, and H3K4me3 are depicted as horizontal bars and were called with  
1435 ChromaBlocks to estimate spreading distance with KRAB recruitment. Domains including or  
1436 proximal to the integration site are annotated with their domain lengths (excludes the reporter  
1437 length).  
1438 **(E)** Quantification of modification level changes with KRAB recruitment. Coordinates of the  
1439 ChromaBlocks-identified domains with asterisks in (C) and (D) were used to define a region for  
1440 signal integration for the corresponding dox-treated (+dox) or untreated (-dox) sample. Log<sub>2</sub>  
1441 ratios of the total dox signal to total nodox signal within these regions are shown for each histone  
1442 modification for each reporter cell line.

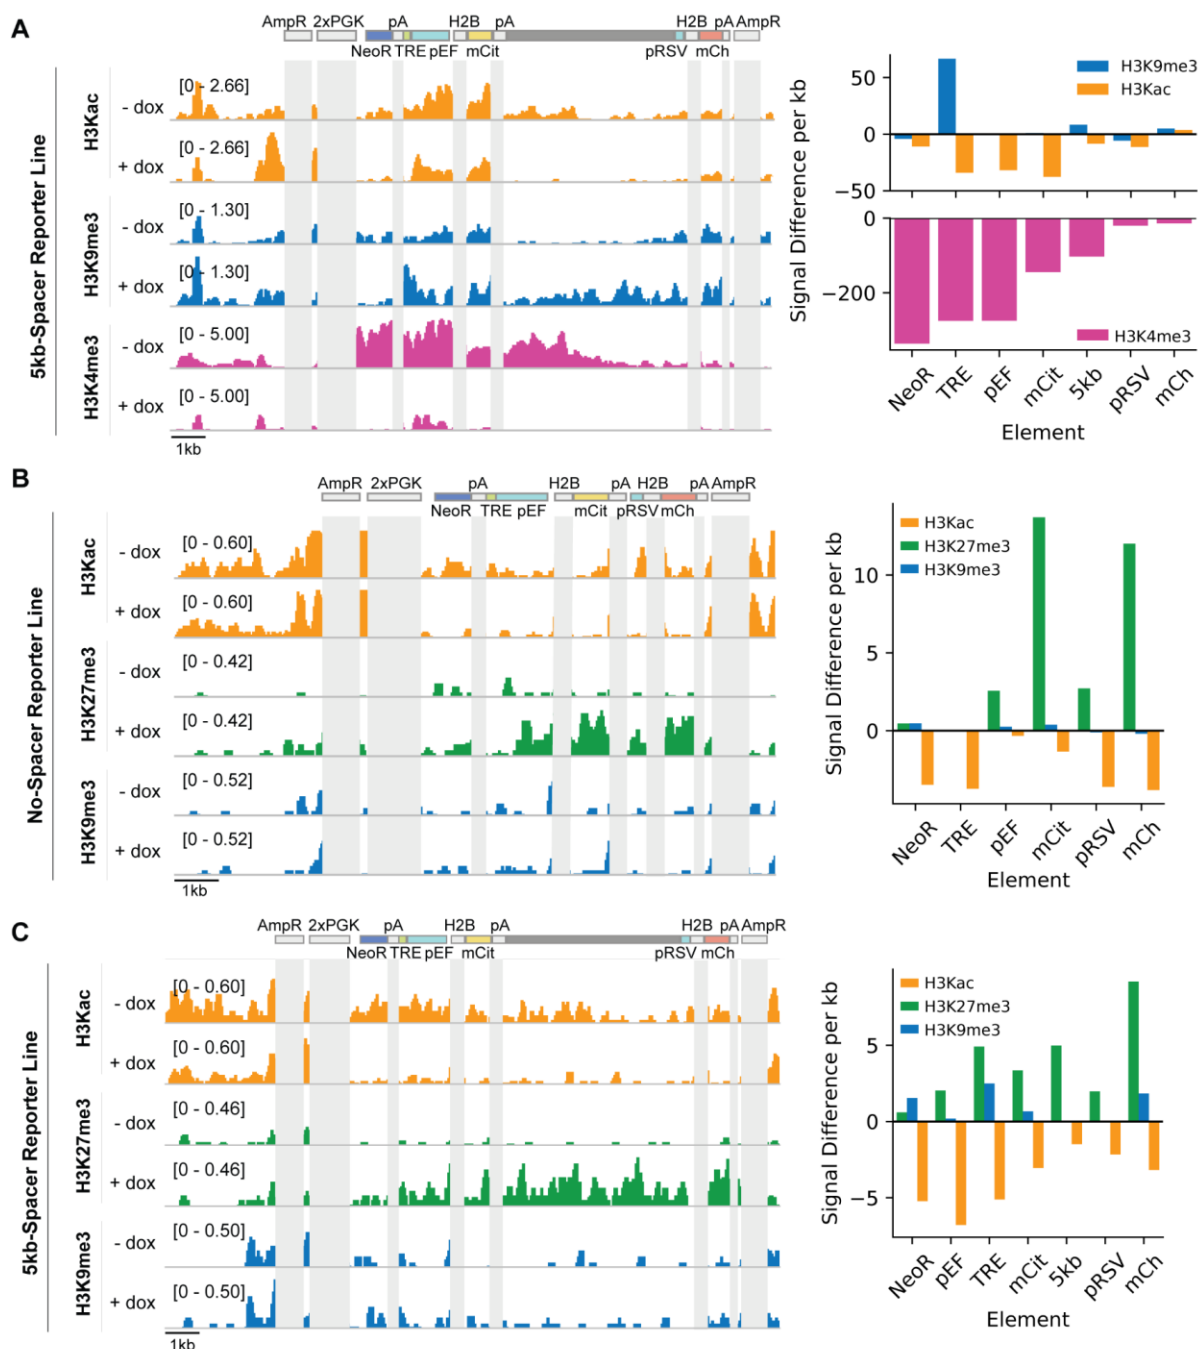

1443  
1444  
1445  
1446  
1447  
1448  
1449  
1450  
1451  
1452

**Figure 2 - figure supplement 2. Recruitment of KRAB or HDAC4 for five days in CHO-K1 cells induces changes in chromatin modifications at the two-gene reporters.**

Genome browser tracks of histone 3 acetyl-lysine (H3Kac), histone 3 lysine 9 trimethylation (H3K9me3), histone 3 lysine 27 trimethylation (H3K27me3), and histone 3 lysine 4 trimethylation (H3K4me3) with (+dox) and without (-dox) recruitment of (A) rTetR-KRAB to the 5kb-spacer reporter, (B) rTetR-HDAC4 to the NS reporter and (C) rTetR-HDAC4 to the 5kb reporter. Reporter and MI-HAC elements that appear multiple times or share significant sequence identity (i.e. H2B, polyA [pA], PGK promoters, ampicillin resistance [AmpR]) are masked in light gray.



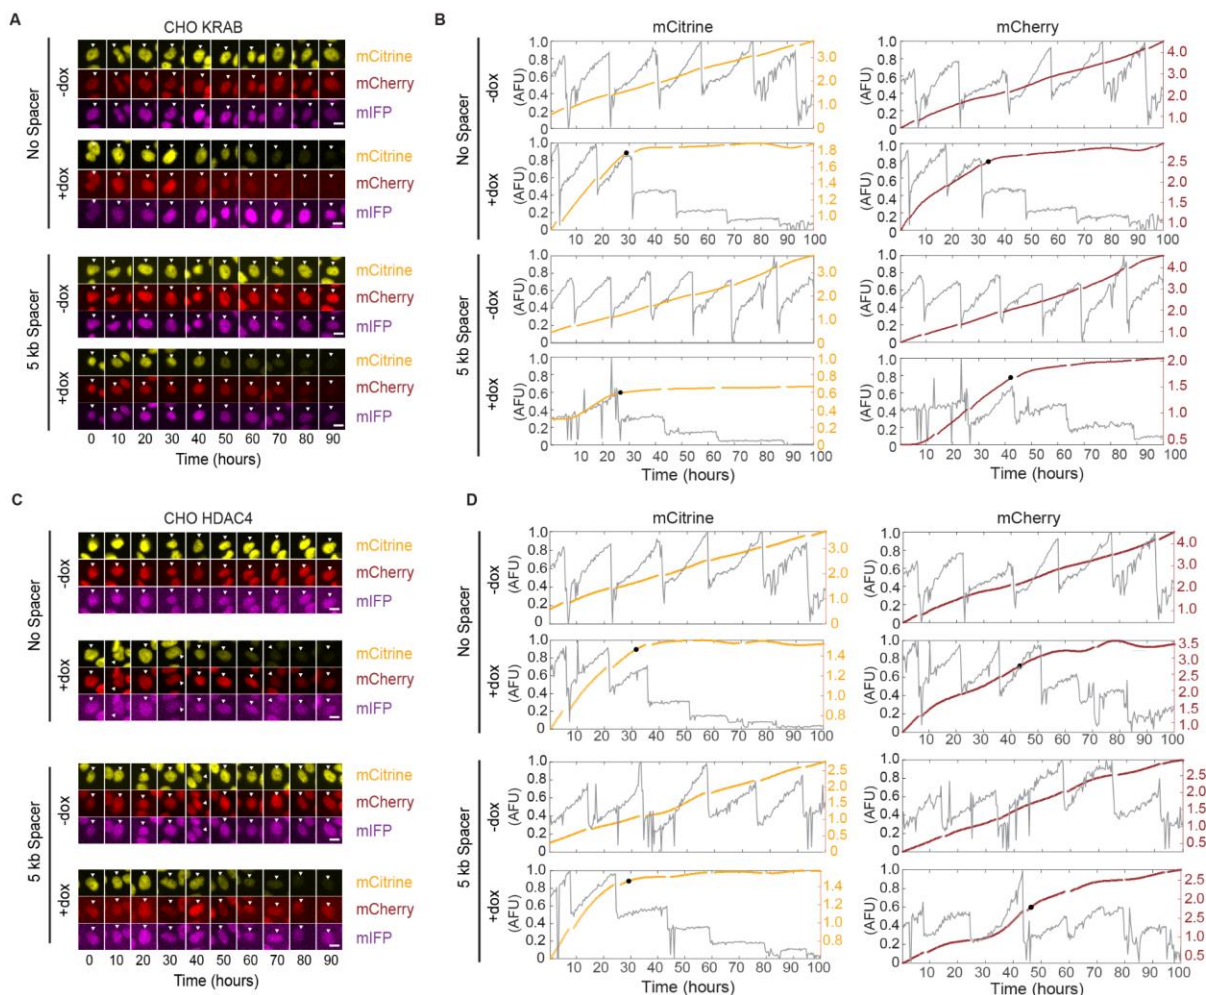

1453  
 1454 **Figure 3 - figure supplement 1. Example images and single-cell analysis of silencing**  
 1455 **dynamics from time-lapse microscopy of CHO-K1 cells.**  
 1456 (A, C) Filmstrips at 10 hour intervals of representative tracked single-cells upon dox induced (A)  
 1457 KRAB and (C) HDAC4 silencing from time-lapse movies in all channels. Scale bar represents  
 1458 10 microns.  
 1459 (B, D) Plot of nuclear intensity of the single-cell tracked in the filmstrip (A,C) in the mCitrine  
 1460 and mCherry channels. Grey traces represent the integrated nuclear intensity prior to stitching.  
 1461 The computationally stitched trace is shown in yellow (mCitrine), or red (mCherry) respectively.  
 1462 The black dot represents the time at which the cell was considered silenced.



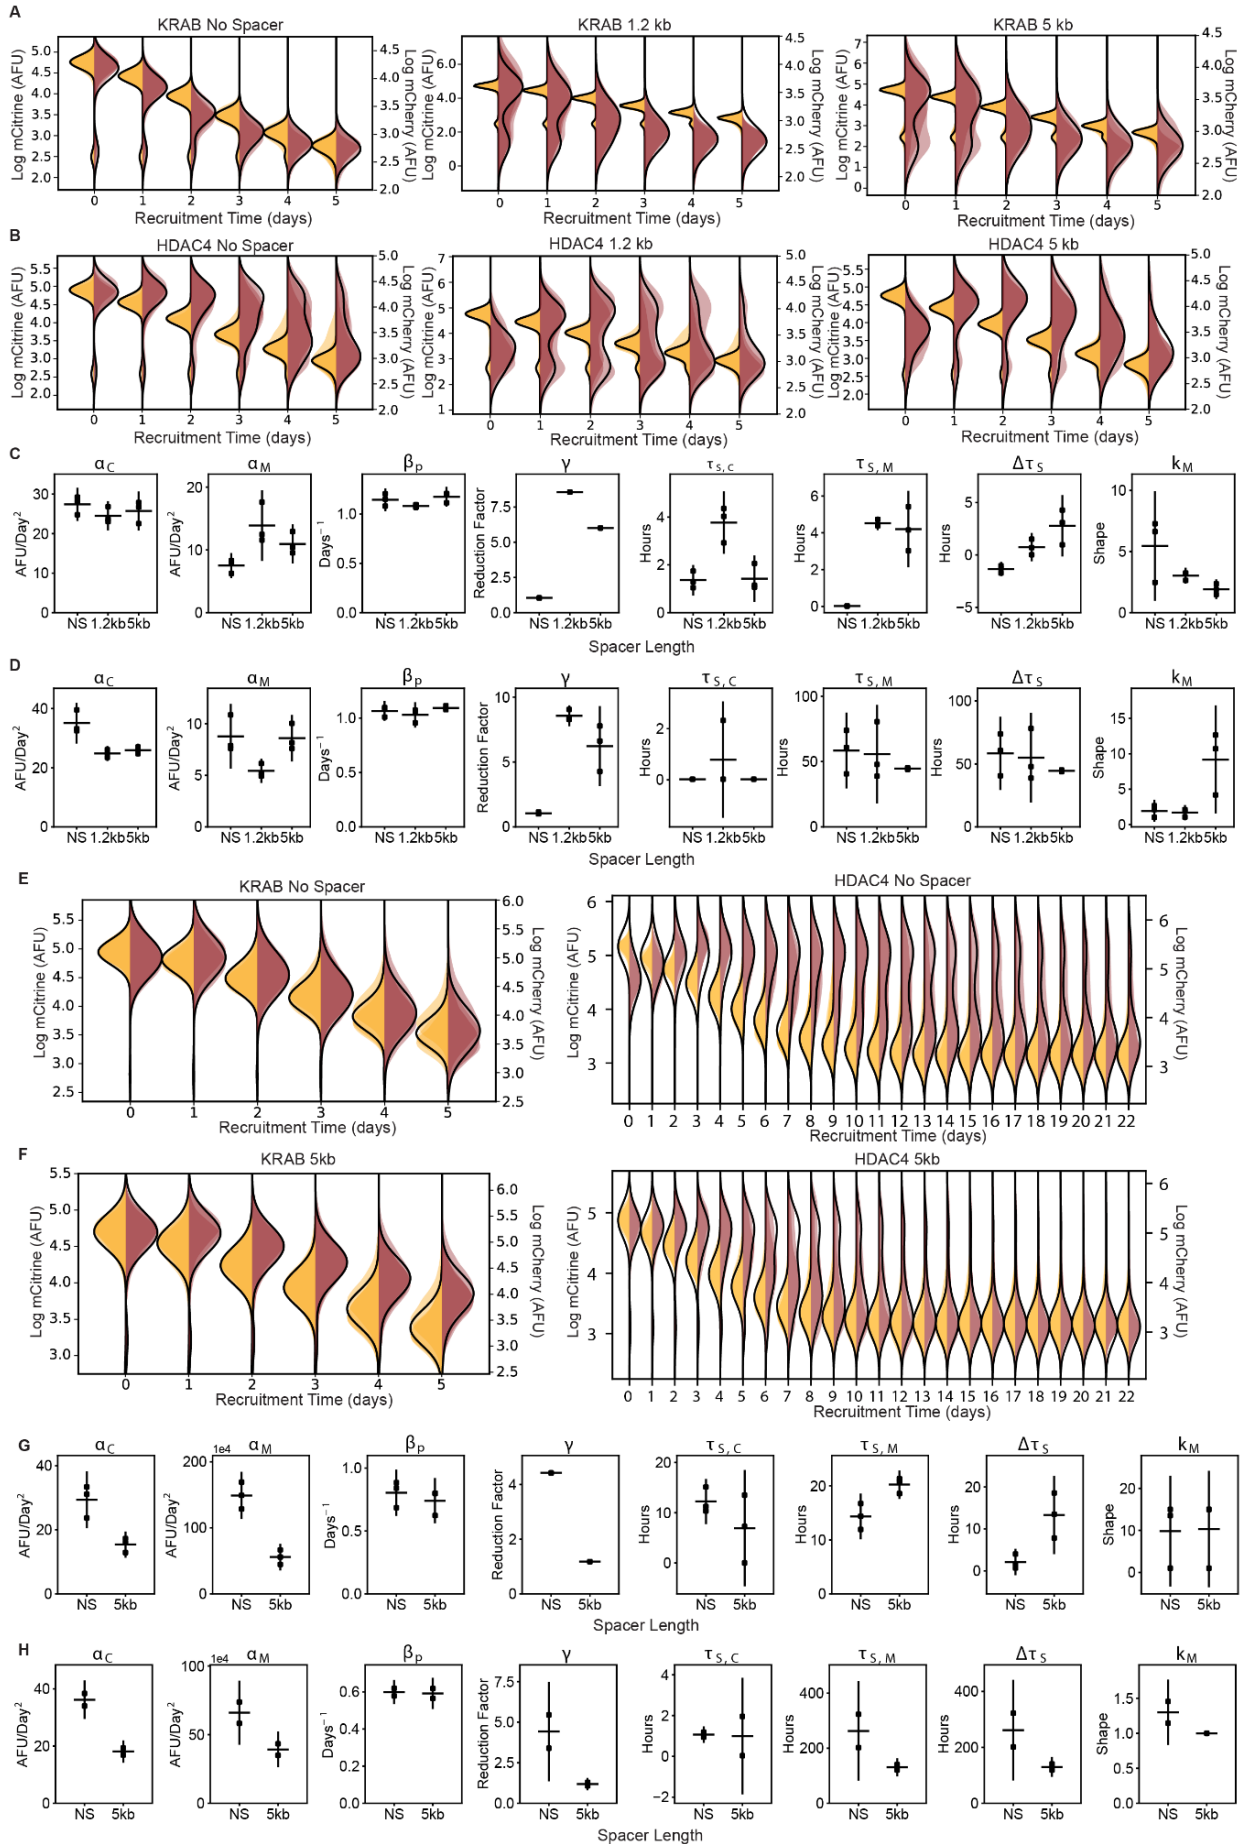

1464 **Figure 3 - figure supplement 2. Dynamics of silencing measured by flow cytometry and fit**  
1465 **by gene expression model.**

1466 **(A-B)** Overlaid daily distributions of mCitrine (transparent yellow) and mCherry (transparent  
1467 red) fluorescence from flow cytometry during recruitment of **(A)** KRAB and **(B)** HDAC4 in  
1468 CHO-K1 for each spreading reporter indicated in the titles with average fit to the model in Fig  
1469 2F (black line) (n=3 clones).

1470 **(C-D)** Parameters from probabilistic model fit (Figure 3F) of flow cytometry data after **(C)**  
1471 KRAB and **(D)** HDAC4 recruitment in CHO-K1. Each dot represents a clone of the given  
1472 reporter, horizontal bar is mean delay, vertical bar is 90% confidence interval estimated using the  
1473 t-distribution.

1474 **(E-F)** Overlaid replicates of daily distributions of mCitrine (transparent yellow) and mCherry  
1475 (transparent red) fluorescence from flow cytometry, with average model fit (black line), during  
1476 recruitment of KRAB (left, n=3) and HDAC4 (right, n=2) to **(E)** NS and **(F)** 5kb reporter in  
1477 K562.

1478 **(G-H)** Parameters from probabilistic model fit of flow cytometry data after **(G)** KRAB and **(H)**  
1479 HDAC4 recruitment in K562. Each dot represents a replicate of the given reporter line,  
1480 horizontal bar is mean delay, vertical bar is 90% confidence interval estimated using the t-  
1481 distribution.

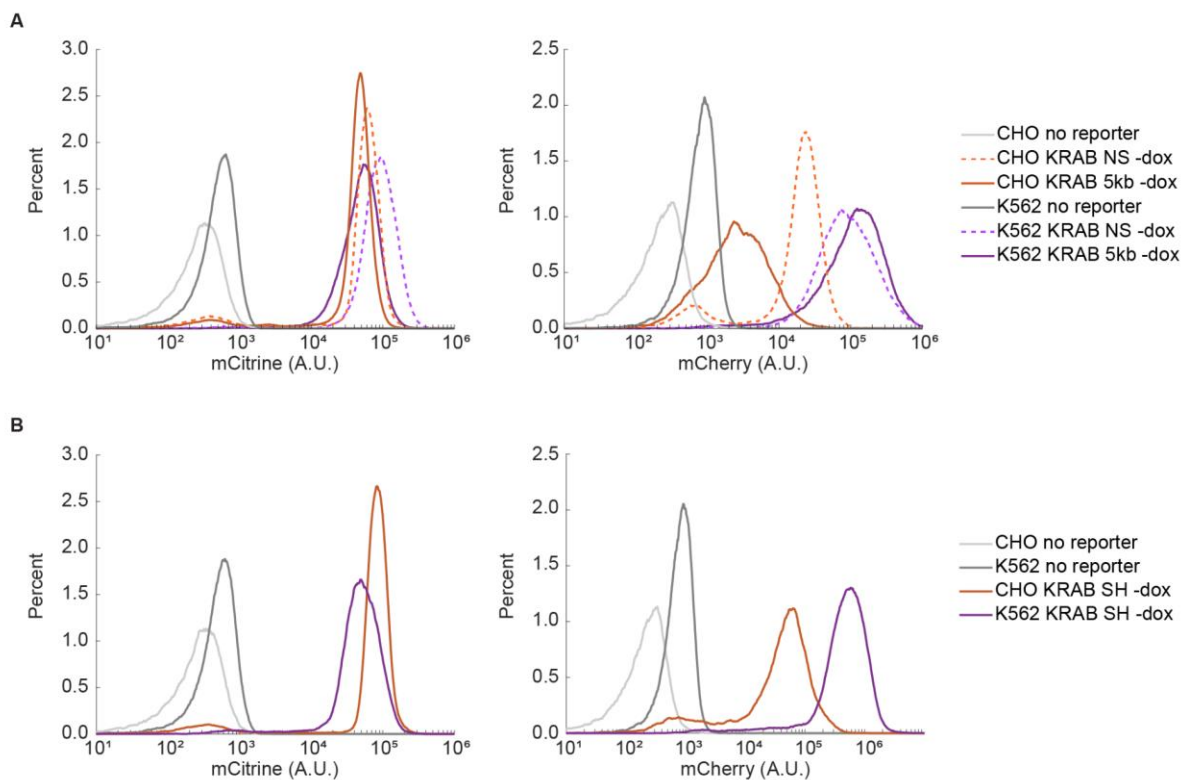

1482  
1483 **Figure 3 - figure supplement 3. Steady-state expression in the absence of dox in CHO-K1**  
1484 **versus K562 cells.**  
1485 Fluorescence distributions of pEF-mCitrine (left) and pRSV-mCherry (right) from flow  
1486 cytometry in the absence of dox-mediated recruitment in CHO-K1 (orange) versus K562 (purple)  
1487 in different reporter constructs: **(A)** NS and 5kb, and **(B)** SH insulator. Note that pRSV-mCherry  
1488 is always expressed at higher levels in K562 compared to CHO-K1.

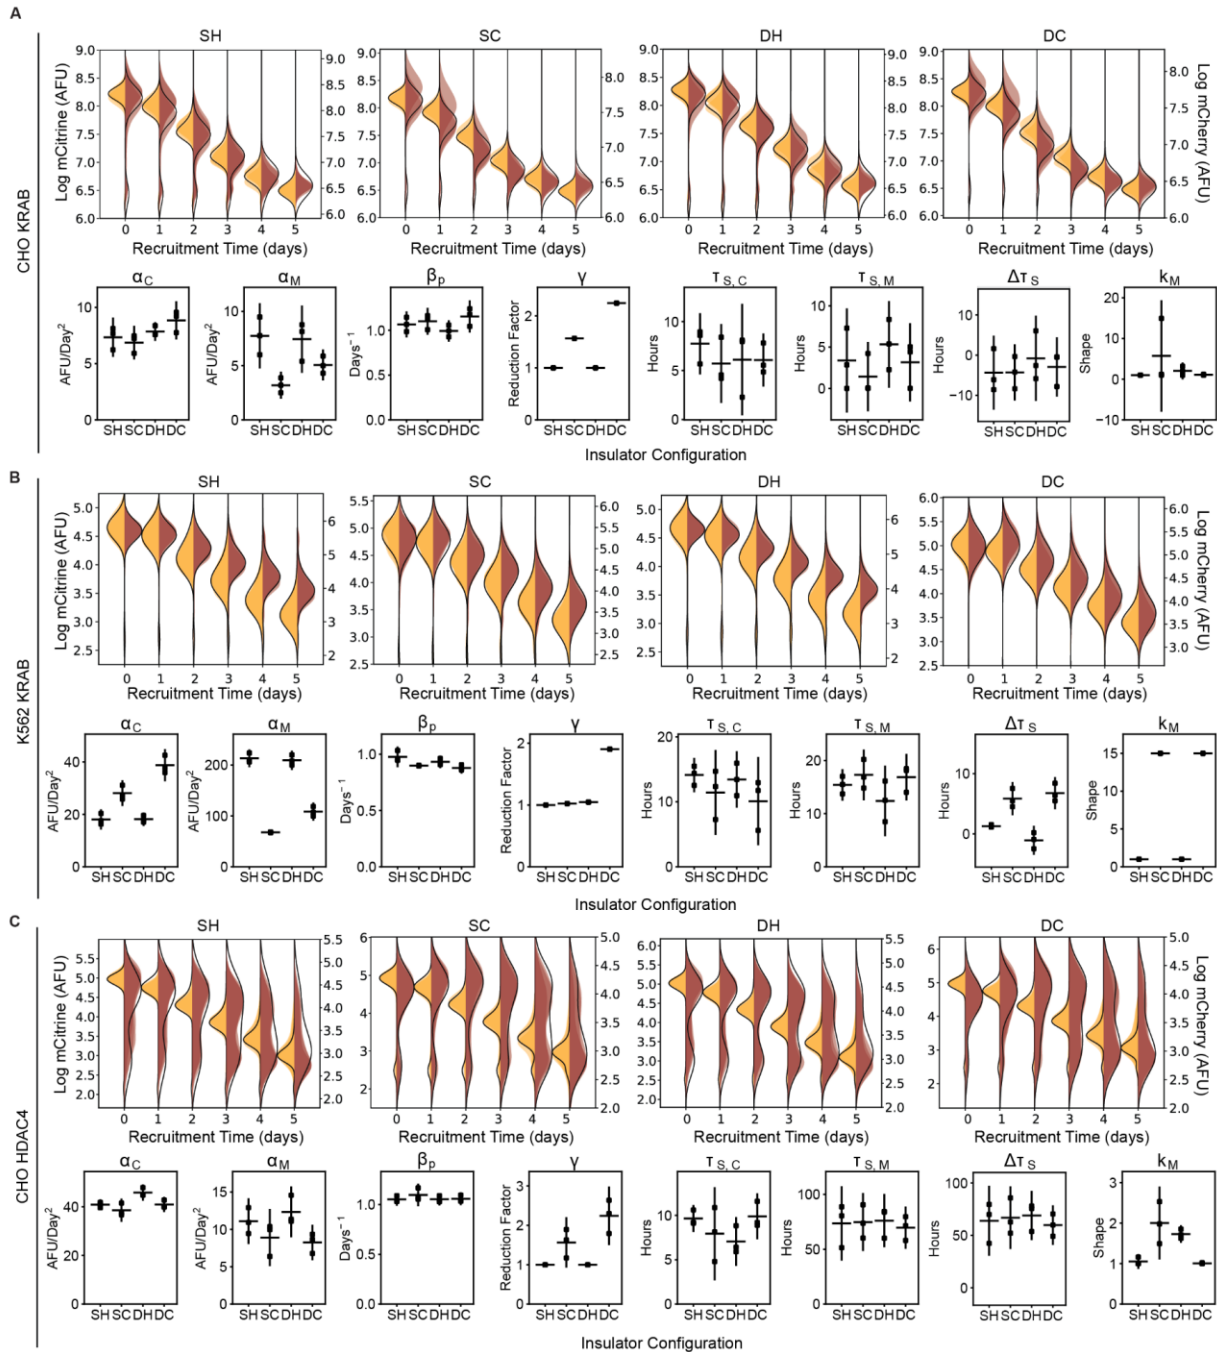

1489  
 1490 **Figure 4 - figure supplement 1. The effect of all insulator configurations on spreading**  
 1491 **dynamics of transcriptional silencing in CHO-K1 and K562.**  
 1492 (Top panels of A-C) Overlaid replicates of daily distributions of mCitrine (transparent yellow)  
 1493 and mCherry (transparent red) fluorescence from flow cytometry and average model fits (black  
 1494 lines) during recruitment of : (A) KRAB in CHO-K1, (B) K562 with KRAB, and (C) CHO-K1  
 1495 with HDAC4. (Bottom panels of A-C) Parameters from probabilistic model fit of flow cytometry  
 1496 data of insulator reporters with (A) KRAB recruitment in CHO-K1, (B) K562 with KRAB, and  
 1497 (C) CHO-K1 with HDAC4. Each dot represents a replicate of the given insulator reporter line,  
 1498 horizontal bar is mean delay, vertical bar is 90% confidence interval estimated using the t-  
 1499 distribution.

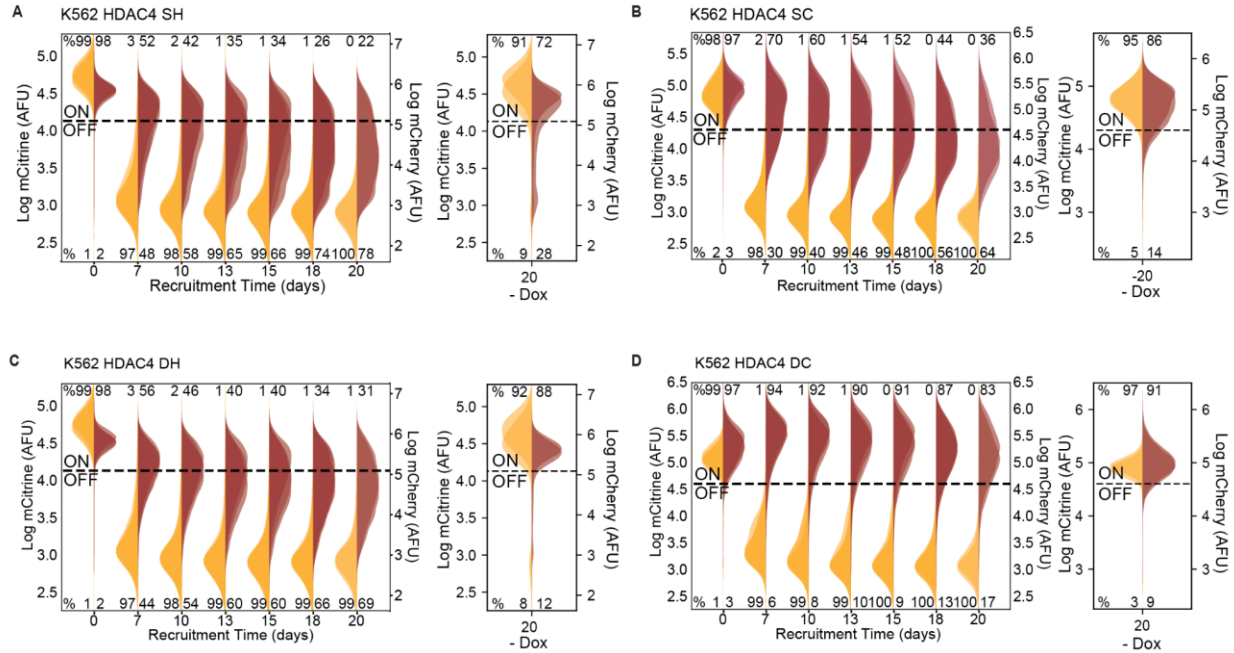

1500

1501

**Figure 4 - figure supplement 2. Insulators attenuate spreading of silencing via HDAC4 in K562.**

1502

1503

1504

1505

1506

Overlaid replicates of distributions of mCitrine (transparent yellow) and mCherry (transparent red) fluorescence from flow cytometry data during extended recruitment of HDAC4 (left, n=3) and 20 days without recruitment (right, n=2) in K562 with insulator geometries defined in Figure 4A and B: (A) SH, (B) SC, (C) DC, and (D) DH.



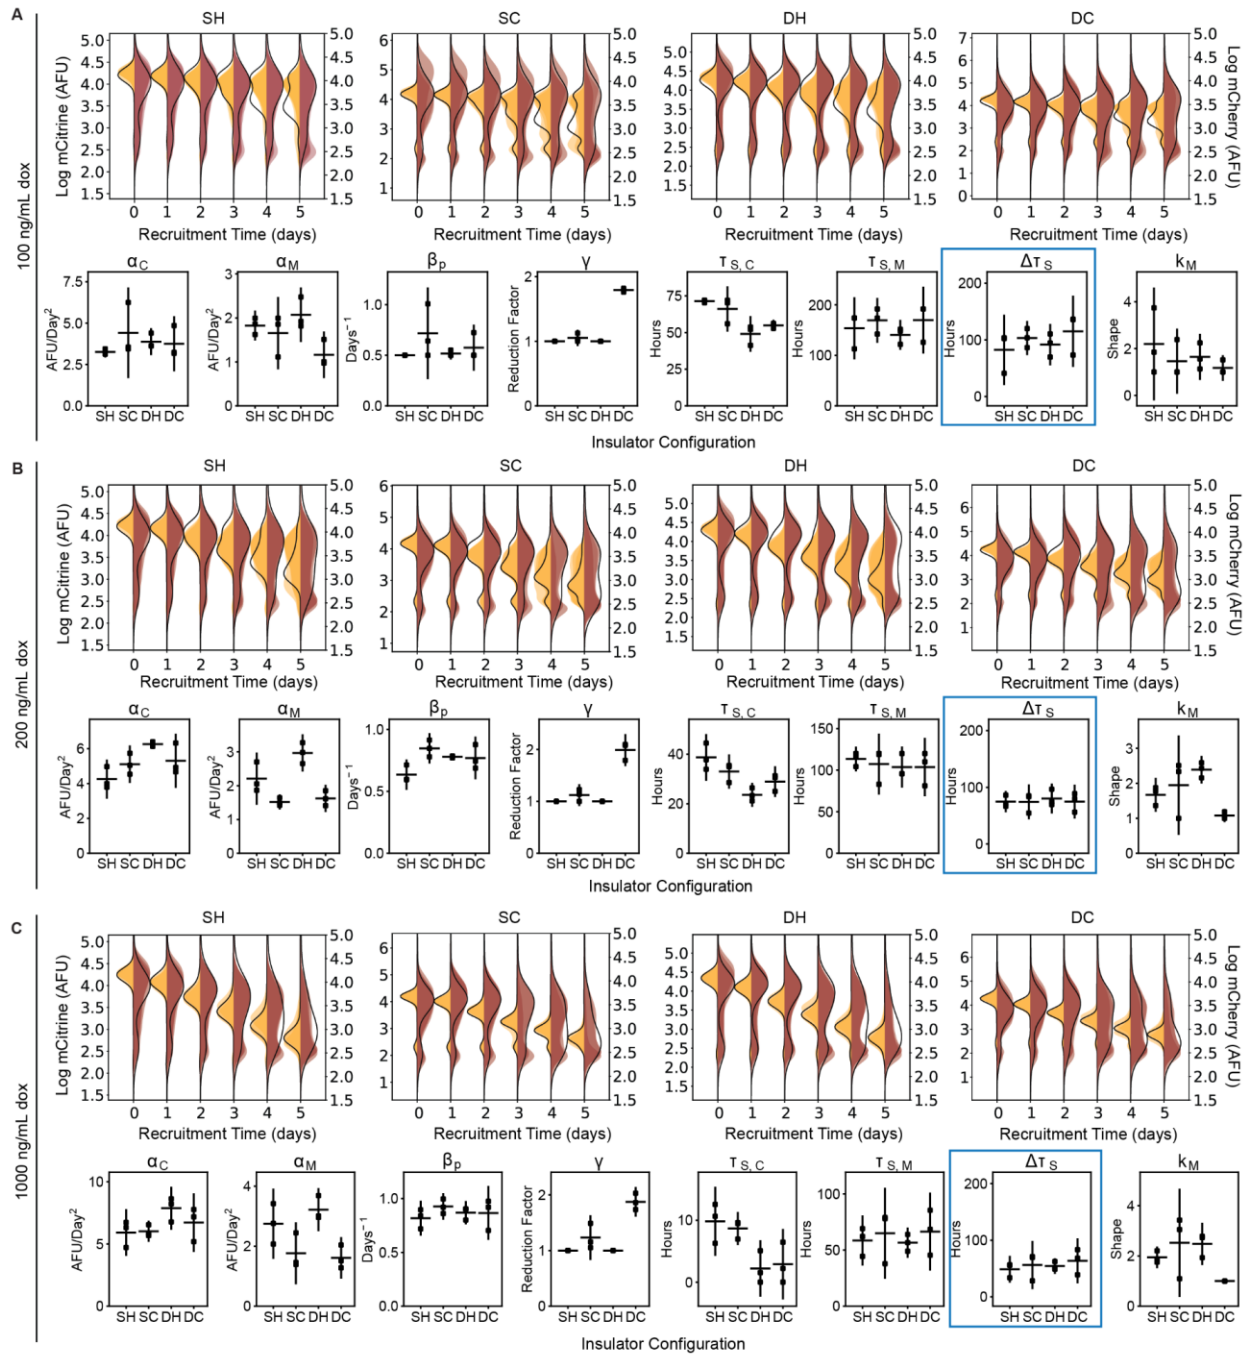

1507  
 1508 **Figure 4 - figure supplement 3. Dynamics of spreading upon weaker gene targeting**  
 1509 **insulator reporters with HDAC4 at lower dox concentrations in CHO-K1.**  
 1510 (Top panels of A-C) Overlaid replicates of daily distributions of mCitrine (transparent yellow)  
 1511 and mCherry (transparent red) fluorescence from flow cytometry and average model fits (black  
 1512 lines) during recruitment of HDAC4 in CHO-K1 at (A) 100 ng/mL, (B) 200 ng/mL, and (C)  
 1513 1000 ng/mL (saturating dox). (Bottom panels of A-C) Parameters from probabilistic model fit of  
 1514 flow cytometry data for insulator reporters with HDAC4 recruitment in CHO-K1 at: (A) 100  
 1515 ng/mL, (B) 200 ng/mL, and (C) and 1000 ng/mL. Each dot represents a replicate of the given  
 1516 insulator reporter line, horizontal bar is mean delay, vertical bar is 90% confidence interval  
 1517 estimated using the t-distribution (n=3). Silencing delay times ( $\Delta T_S$ ) highlighted in blue.



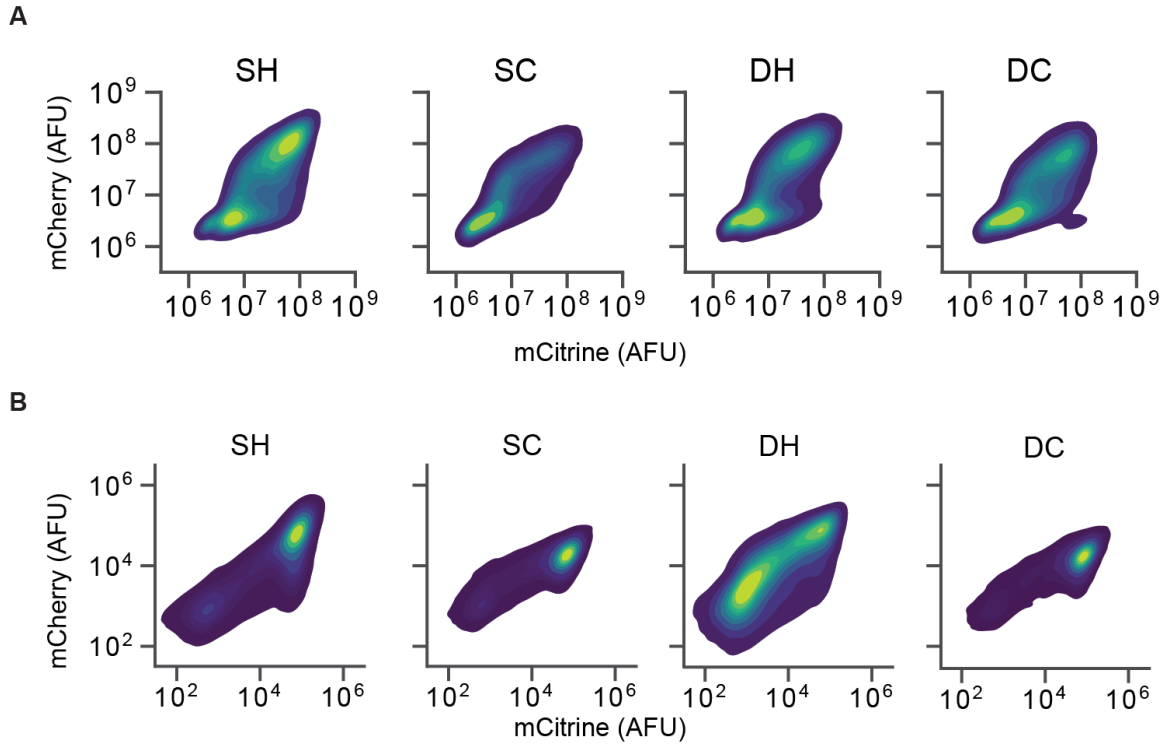

1518

1519

1520

1521

1522

1523

**Figure 4 - figure supplement 4. Insulators do not block spreading of silencing with weaker gene targeting at lower dox concentrations.**

2D density plots of mCitrine and mCherry fluorescence measured by flow cytometry in CHO-K1 cells with insulator constructs indicated in the title of each graph after 5 days of (A) 200 ng/mL dox recruitment of HDAC4, or (B) 4 ng/mL dox recruitment of KRAB.

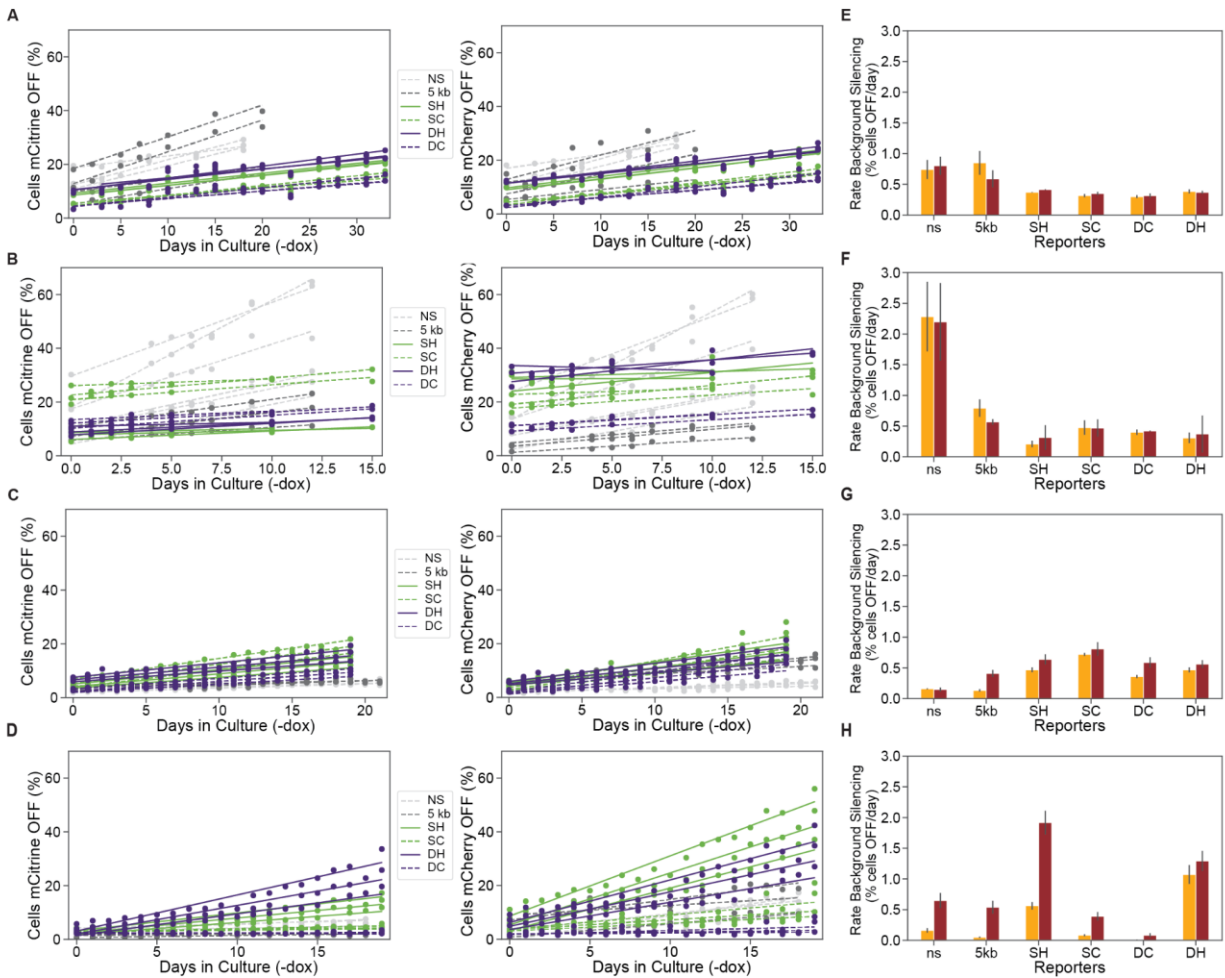

1524  
 1525 **Figure 4 - figure supplement 5. Insulators prevent background silencing of reporter genes.**  
 1526 (A-D) Background levels of mCitrine (left) and mCherry silencing (right) in reporters with  
 1527 lambda spacers or insulators in the absence of dox for: (A) CHO-K1 KRAB, (B) CHO-K1  
 1528 HDAC4, (C) K562 KRAB, and (D) K562 HDAC4 cell lines.  
 1529 (E-H) Rates of background silencing of mCitrine and mCherry in the absence of dox in: (E)  
 1530 CHO-K1 KRAB, (F) CHO-K1 HDAC4, (G) K562 KRAB, and (H) K562 HDAC4 cell lines.  
 1531 Error bars represent standard error of mean for 3 clones or replicates.

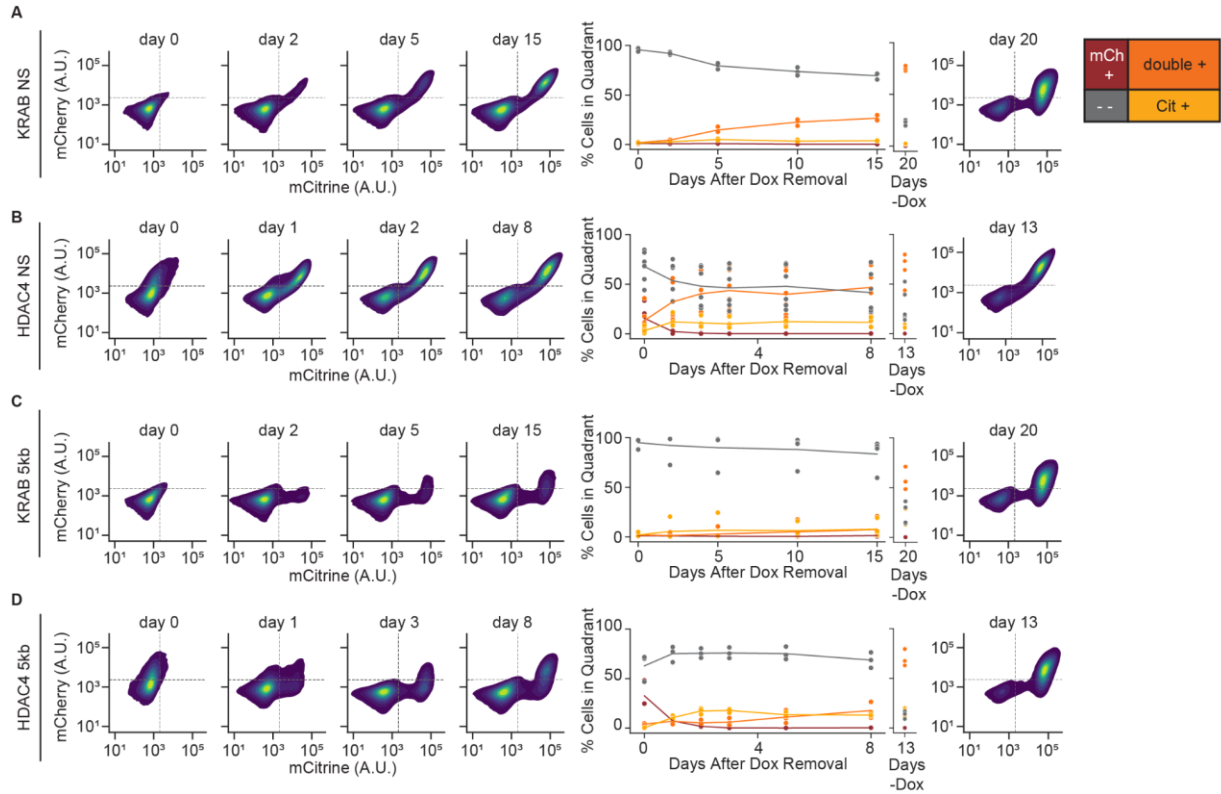

1532  
 1533  
 1534  
 1535  
 1536  
 1537  
 1538  
 1539  
 1540

**Figure 5 - figure supplement 1. Reactivation of gene expression in CHO-K1 NS and 5kb reporter lines.**

(Left) 2D density plots of mCitrine and mCherry fluorescence from flow cytometry at different timepoints of reactivation (day 0 represents the end of 5 days of CR recruitment), (middle) percentages of cells in each quadrant as a function of release time, and (right) 2D density plots for no dox controls in: (A) NS reporter with KRAB (n=3 clones), (B) NS reporter with HDAC4 (n=6 clones), (C) 5kb reporter with KRAB (n=4 clones), and (D) 5kb reporter with HDAC4 (n=3 clones).

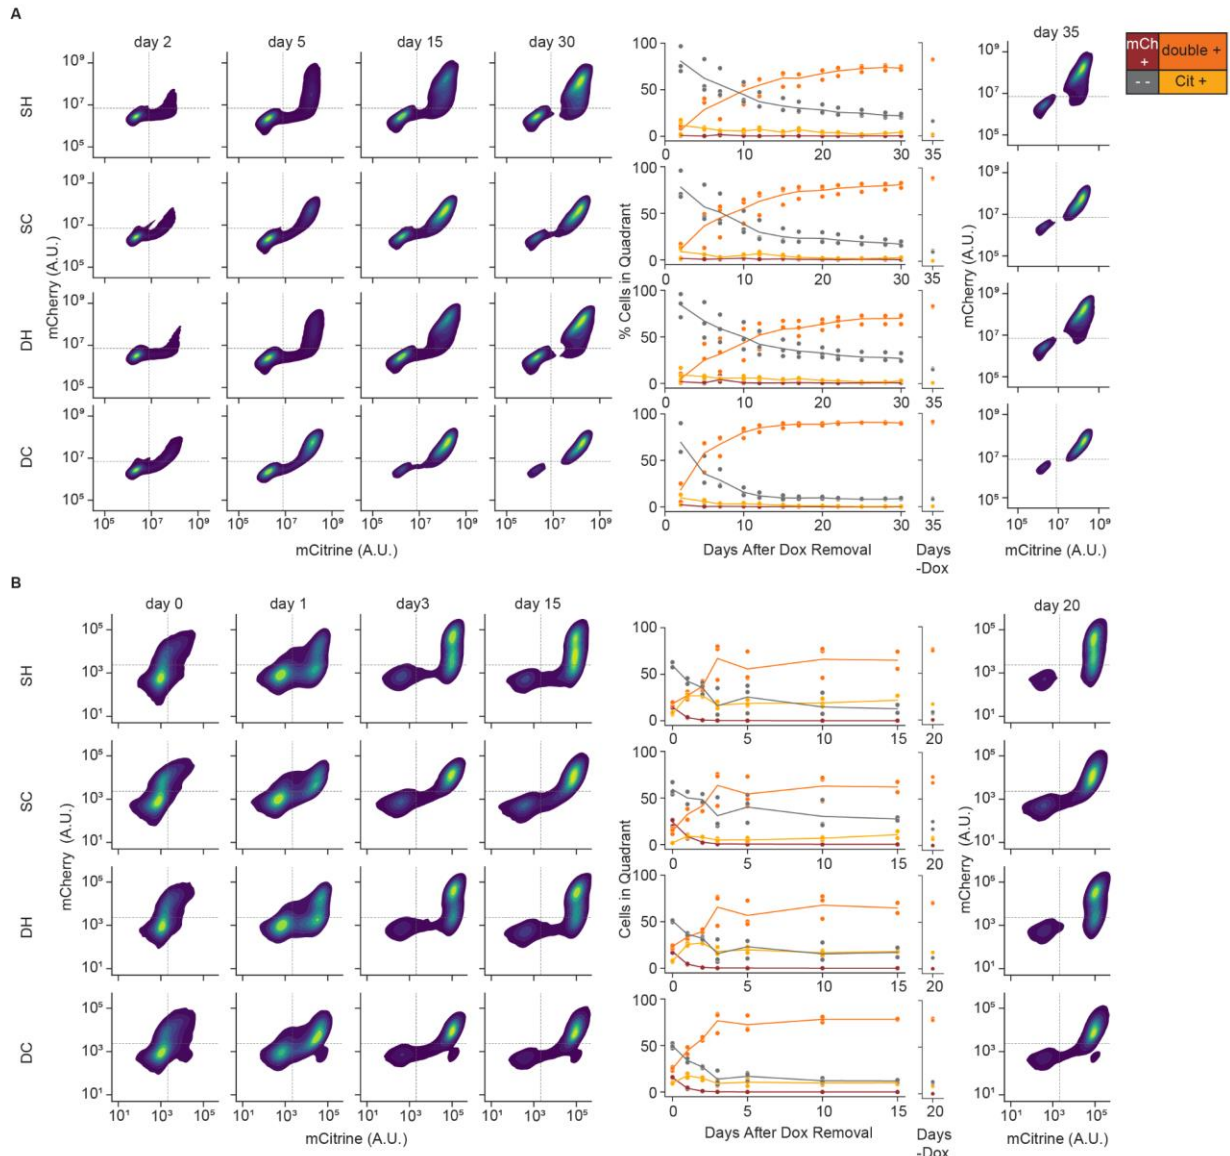

1541  
 1542 **Figure 5 - figure supplement 2. Reactivation of gene expression in CHO-K1 insulator**  
 1543 **reporter lines.**  
 1544 (Left) 2D density plots of mCitrine and mCherry fluorescence from flow cytometry at different  
 1545 timepoints of reactivation (day 0 represents the end of 5 days of CR recruitment), (middle)  
 1546 percentages of cells in each quadrant as a function of release time, and (right) 2D density plots  
 1547 for no dox controls in: **(A)** insulators with KRAB and **(B)** insulators with HDAC4. Replicates are  
 1548 from biological replicates of multiclonal populations (n=3).

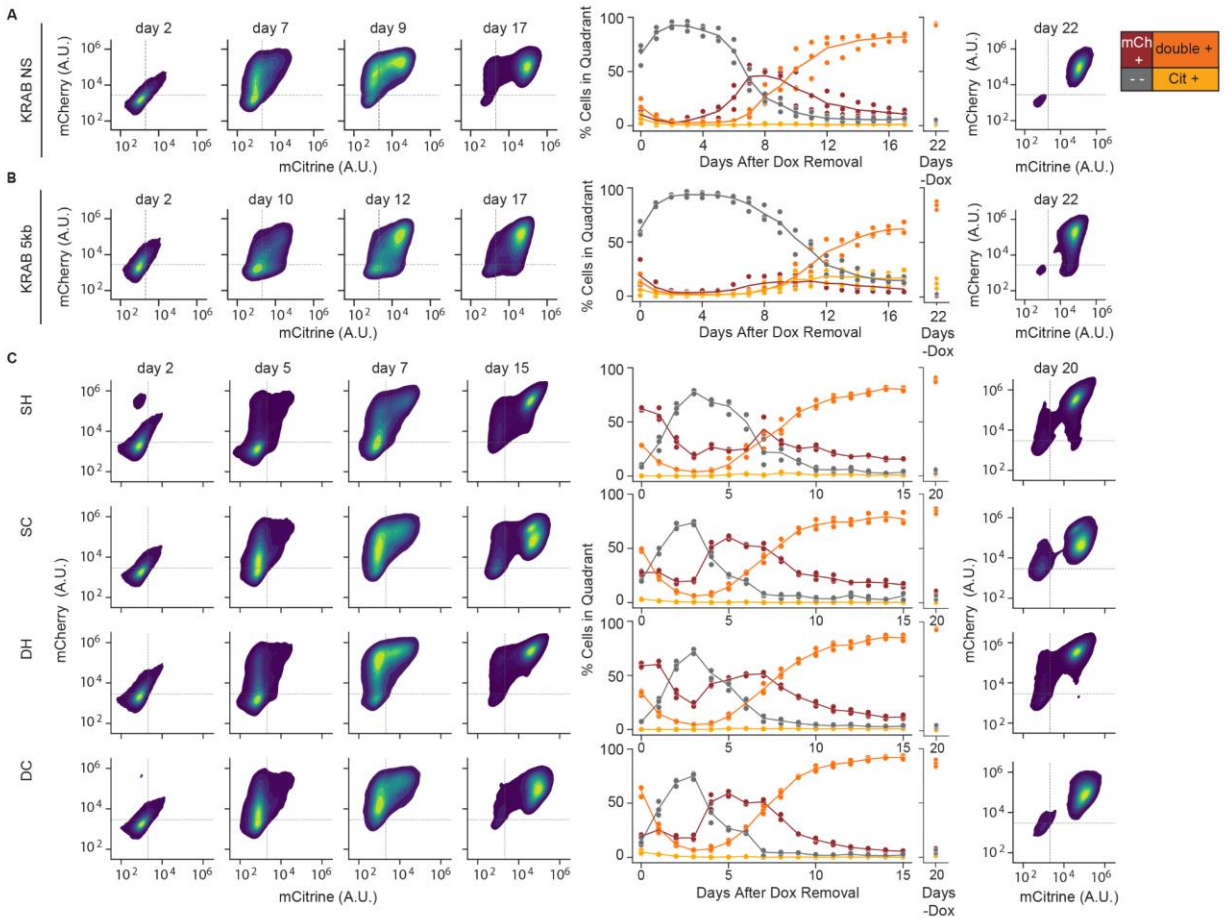

1549

1550

**Figure 5 - figure supplement 3. Reactivation of gene expression in K562 cell reporter lines.**

1551 (Left) 2D density plots of mCitrine and mCherry fluorescence from flow cytometry at different  
1552 timepoints of reactivation (day 0 represents the end of 5 days of CR recruitment), (middle)

1553 percentages of cells in each quadrant as a function of release time, and (right) 2D density plots  
1554 for no dox controls in: (A) NS, (B) 5kb, and (C) insulator reporters after release of KRAB.

1555 Replicates are from biological replicates of multiclonal populations (n=3).

1556 **Table S1. Primers used for investigating transcriptional interference.**

1557

| Assay | Locus                            | Name                  | Sequence (5'→3')                   |
|-------|----------------------------------|-----------------------|------------------------------------|
| PCR   | Beta-actin<br>(human<br>genome)  | ACTB-F1               | CATGTACGTTGCTATCCAGGC              |
| PCR   |                                  | ACTB-R1               | CTCCTTAATGTCACGCACGAT              |
| PCR   | mCitrine                         | citrine3prime_fwd     | GTAAGTGTACCCAATTCGCCCT<br>ATAGTGAG |
| PCR   | mCherry                          | mCherry5prime_reverse | TCCTCGCCCTTGCTCACCAT               |
| qPCR  | mCitrine                         | F_cit_Set2            | CGGCGACGTAAACGGCCACAA<br>GTTTCAG   |
| qPCR  |                                  | R_cit_Set2            | CTTGCCGGTGGTGCAGATGAA              |
| qPCR  | 5kb lambda                       | 5kb_lambda_Set1_F     | CCACCTGTTACTGGTCGATTTA             |
| qPCR  |                                  | 5kb_lambda_Set1_R     | GATATTCCCACCTCCGGTTAAG             |
| qPCR  | mCherry                          | mCherry_Set1_F        | AGGACGGCGAGTTCATCTA                |
| qPCR  |                                  | mCherry_Set1_R        | CCCATGGTCTTCTTCTGCATTA             |
| qPCR  | Beta-actin<br>(CHO-K1<br>genome) | bActin_F              | ACTGGGACGATATGGAGAAG               |
| qPCR  |                                  | bActin_R              | GGTCATCTTTTCACGGTTGG               |

1558



1559 **Table S2. Delay times between mCitrine and mCherry silencing from model fit to flow**  
 1560 **cytometry data.** The 90% confidence interval (CI) was estimated using the t-distribution.

|               |              | <b>Reporter</b> | $\Delta\tau_s$<br><b>(hour)</b> | <b>90%<br/>CI</b> |
|---------------|--------------|-----------------|---------------------------------|-------------------|
| <b>CHO-K1</b> | <b>KRAB</b>  | <b>NS</b>       | -1.34                           | ±0.59             |
|               |              | <b>1.2 kb</b>   | 0.75                            | ±1.26             |
|               |              | <b>5kb</b>      | 2.78                            | ±2.82             |
|               |              | <b>SH</b>       | -4.36                           | ±8.96             |
|               |              | <b>SC</b>       | -4.29                           | ±6.75             |
|               |              | <b>DH</b>       | -0.78                           | ±10.36            |
|               |              | <b>DC</b>       | -2.92                           | ±7.14             |
|               | <b>HDAC4</b> | <b>NS</b>       | 58.4                            | ±28.2             |
|               |              | <b>1.2 kb</b>   | 54.9                            | ±34.8             |
|               |              | <b>5kb</b>      | 44.5                            | ±1.1              |
|               |              | <b>SH</b>       | 64                              | ±32.5             |
|               |              | <b>SC</b>       | 67                              | ±28.9             |
|               |              | <b>DH</b>       | 69.1                            | ±22.6             |
|               |              | <b>DC</b>       | 59.9                            | ±17.9             |
| <b>K562</b>   | <b>KRAB</b>  | <b>NS</b>       | 2.1                             | ±2.91             |
|               |              | <b>5kb</b>      | 13.3                            | ±9.1              |
|               |              | <b>SH</b>       | 1.29                            | ±0.37             |
|               |              | <b>SC</b>       | 5.86                            | ±2.58             |
|               |              | <b>DH</b>       | -1.06                           | ±2.25             |
|               |              | <b>DC</b>       | 6.76                            | ±2.52             |
|               | <b>HDAC4</b> | <b>NS</b>       | 261                             | ±177              |
|               |              | <b>5kb</b>      | 130                             | ±32               |

1561

1562 **Movie S1. Spreading of silencing movie for KRAB NS.**

1563 **Movie S2. Spreading of silencing movie for KRAB 5kb.**

1564 **Movie S3. Spreading of silencing movie for HDAC4 NS.**

1565 **Movie S4. Spreading of silencing movie for HDAC4 5kb.**

1566 Movies S1-4 are zoomed-in views of spreading of silencing for KRAB and HDAC4 in the NS and  
1567 5kb reporters in CHO-K1. Each movie is digitally cropped to follow a subset of cells captured in  
1568 the full frame. mCitrine fluorescence is pseudo-colored as yellow, and mCherry fluorescence is  
1569 pseudo-colored in red. Timestamps are in HH:MM relative to dox addition at 0 hours.
